# Supplementary material for: A School Based Cluster Randomised Health Education Intervention Trial for Improving Knowledge and Attitudes Related to Taenia solium Cysticercosis and Taeniasis in Mbulu District, Northern Tanzania
Source: PLoS One. 2015 Feb 26;10(2):e0118541. doi: 10.1371/journal.pone.0118541 (PMC4342010; doi:10.1371/journal.pone.0118541)
Supplement: S1 File — (XLS) [file pone.0118541.s001.xls]

## Sheet: DATA_individual
	File.S1. Data. Used in the study to assess effectiveness of health education on school children's knowledge and attitude related to Taenia solium in Tanzania
Visit	Student_ID	Date_Interview	School_Category	School_Name	School_ID	Treatment	School_Participation	Student_Sex	Student_Age	Seen_Tapeworm	Howacquire_Tapeworm	Signs_Tapeworm	HowavoidTapeworm	Heard_Cysticercosis	Firstheard-Cysticercosis_parents	Firstheard-Cysticercosis_teacher	HowPigacquire_Cysticercosis	Howrecognize_Cysticercosis_Tongue/Eyelid_nodules	Howprevent_Cysticercosis_Prevhumanfaece	CanHumanget_Cysticercosis	HowHumanget_Cysticercosis	Cystslocation_InHuman	Heard_Epilepsy	Symptoms_Epilepsy	Causes_Epilepsy	DokeepPigs	Consumepork	Slaughteredpigs	Iffound_Cysticpork	Livepig_Cysticercosis	Parentsresponse	BestWayOfKeepingPigs
0	437	8/11/2010	0	Anslay	1	0	1	0	15	0				1	1	0	1	1	1	0		0	1	1	0	1	1	1	1	0	0	1
0	438	8/11/2010	0	Anslay	1	0	1	1	14	1	1	0	1	1	1	0	1	1	1	1	1	0	0			1	1	0	0	0	0	1
0	439	8/11/2010	0	Anslay	1	0	1	1	12	0				1	0	1	0	1	1	0		0	1	1	0	1	0	1	1	0	1	1
0	440	8/11/2010	0	Anslay	1	0	1	1	14	1	1	1	1	1	1	1	1	1	1	0		0	0			1	1	0	0	0	1	1
0	441	8/11/2010	0	Anslay	1	0	1	1	15	0				1	1	1	0	1	0	0		0	1	1	0	1	0	0	0	1	1	1
0	442	8/11/2010	0	Anslay	1	0	1	1	14	1	1	1	1	1	1	0	0	1	1	0		1	1	1	0	1	1	0	1	1	1	1
0	443	8/11/2010	0	Anslay	1	0	1	0	15	0				1	1	0	1	1	1	0		1	1	1	0	0	1	0	1	1	0	1
0	444	8/11/2010	0	Anslay	1	0	1	0	13	1	0	1	1	1	1	1	1	1	1	0		0	1	1	0	1	1	1	1	0	1	1
0	445	8/11/2010	0	Anslay	1	0	1	1	13	0				1	0	1	0	1	0	1	0	0	0			1	0	0	0	0	0	1
0	446	8/11/2010	0	Anslay	1	0	1	1	13	1	0	1	1	1	1	0	1	1	1	0		0	0			1	1	1	1	0	1	0
0	447	8/11/2010	0	Anslay	1	0	1	1	14	0				0									1	1	0	1	1	1	0	1	1	1
0	448	8/11/2010	0	Anslay	1	0	1	0	13	0				1	1	0	0	1	0	1	0	0	0			1	1	1	1	1	1	1
0	449	8/11/2010	0	Anslay	1	0	1	1	13	0				0									0			1	0	0	0	0	1	1
0	450	8/11/2010	0	Anslay	1	0	1	0	15	1	1	1	1	1	1	0	0	1	1	0		0	0			1	1	1	1	0	0	1
0	451	8/11/2010	0	Anslay	1	0	1	0	14	1	0	1	1	1	1	0	0	1	1	0		0	1	1	0	1	0	0	0	1	1	1
0	452	8/11/2010	0	Anslay	1	0	1	0	15	0				1	1	0	0	1	0	0		0	1	0	0	1	1	0	0	1	0	1
0	453	8/11/2010	0	Anslay	1	0	1	1	14	0				1	1	1	0	0	0	1	0	0	0			1	0	0	0	1	1	1
0	454	8/11/2010	0	Anslay	1	0	1	0	13	1	0	1	1	1	1	1	0	1	1	0		0	1	1	0	1	1	0	1	0	1	1
0	455	8/11/2010	0	Anslay	1	0	1	1	14	0				1	1	0	1	0	1	0		0				1	1	1	1	1	1	1
0	456	8/11/2010	0	Anslay	1	0	1	1	15	1	0	1	0	1	1	1	1	1	1	0		0	0			1	1	1	0	0	1	1
0	457	8/11/2010	0	Anslay	1	0	1	0	16	1	0	1	1	1	1	1	1	0	1	0		0	0			1	1	1	1	0	0	1
0	458	8/11/2010	0	Anslay	1	0	1	1	16	1	0	1	1	1	1	0	1	1	1	1	0	0	0			1	1	1	0	1	1	1
0	459	8/11/2010	0	Anslay	1	0	1	0	18	1	1	1	1	1	1	0	1	1	1	1	0	0	1	1	0	1	1	1	1	0	1	1
0	460	8/11/2010	0	Anslay	1	0	1	1	14	1	1	1	1	1	1	1	1	0	1	0		0	1	0	0	1	1	1	1	0	0	1
0	461	8/11/2010	0	Anslay	1	0	1	0	13	1	0	1	1	1	1	0	0	1	0	0		0	0			1	1	0	1	1	1	1
0	462	8/11/2010	0	Anslay	1	0	1	0	14	1	0	1	1	1	1	0	1	1	1	0		0	0			0	1	1	1	0	1	1
0	463	8/11/2010	0	Anslay	1	0	1	0	16	1	0	1	1	1	1	0	1	1	1	1	0	1	0			1	1	1	1	0	1	1
0	464	8/11/2010	0	Anslay	1	0	1	0	13	0				1	1	0	1	1	0	0		0	0			1	1	1	1	0	1	1
0	465	8/11/2010	0	Anslay	1	0	1	0	13	0				1	1	0	1	1	1	0		0	1	1	0	1	1	1	1	0	0	1
0	466	8/11/2010	0	Anslay	1	0	1	1	14	1	1	0	0	1	0	1	1	1	1	1	1	0	1	1	0	1	1	1	0	0	1	1
0	467	8/11/2010	0	Anslay	1	0	1	0	16	0				1	1	0	1	1	1	0	0	1	1	0	0	1	1	1	0	0	0	1
0	468	8/11/2010	0	Anslay	1	0	1	0	15	0				1	1	0	1	1	1	0		0	1	1	0	1	0	1	1	0	1	1
0	469	8/11/2010	0	Anslay	1	0	1	1	13	1	0	0	1	1	0	1	1	1	1	1	0	0	1	1	0	1	1	0	0	0	1	1
0	470	8/11/2010	0	Anslay	1	0	1	0	13	1	1	0	0	1	1	0	0	1	0	0		0	0			1	0	1	0	0	1	1
0	471	8/11/2010	0	Anslay	1	0	1	1	16	1	0	1	0	1	1	1	1	1	1	0		0	0			1	1	0	0	0	0	1
0	472	8/11/2010	0	Anslay	1	0	1	0	15	1	0	1	0	1	1	0	1	1	1	0		0	1	1	0	1	1	0	0	0	0	1
0	473	8/11/2010	0	Anslay	1	0	1	1	15	1	0	1	1	1	1	0	0	1	0	0		1	0			1	0	1	1	0	1	1
0	474	8/11/2010	0	Anslay	1	0	1	0	13	0				1	1	0	1	1	1	0		0	0			0	1	0	1	1	1	1
0	475	8/11/2010	0	Anslay	1	0	1	0	15	0				1	1	0	1	1	1	0		0	0			0	1	1	0	0	0	1
0	476	8/11/2010	0	Anslay	1	0	1	1	15	0				1	1	0	1	1	1	0		0	0			1	1	1	0	0	1	1
0	477	8/11/2010	0	Anslay	1	0	1	1	13	1	1	1	1	1	1	1	1	1	0	0		0	1	1	0	1	1	1	1	0	1	1
0	478	8/11/2010	0	Anslay	1	0	1	0	13	1	0	1	1	1	1	1	1	1	1	0		0	0			1	1	1	1	0	1	1
0	264	4/11/2010	0	Diyomat	2	1	1	1	14	0				1	1	0	1	1	1	0		0	1	1	0	0	1	1	1	0	1	0
0	265	4/11/2010	0	Diyomat	2	1	1	1	13	1	0	1	1	1	1	0	1	0	1	0		0	1	0	0	1	1	0	0	0	0	0
0	266	4/11/2010	0	Diyomat	2	1	1	0	14	0				1	1	0	1	1	1	1	1	0	0			1	1	1	1	0	1	1
0	267	4/11/2010	0	Diyomat	2	1	1	1	13	1	0	0	0	1	0	1	1	1	1	1	0	0	1	1	0	1	1	1	1	0	1	1
0	268	4/11/2010	0	Diyomat	2	1	1	0	13	1	0	0	1	1	1	0	0	0	0	1	0	0	0	0	0	1	1	1	0	0	1	0
0	269	4/11/2010	0	Diyomat	2	1	1	1	14	1	0	0	1	1	1	0	1	1	1	0		0	1		0	1	1	1	1	0	1	1
0	270	4/11/2010	0	Diyomat	2	1	1	1	14	1	0	0	0	1	1	0	1	0	1	1	0	0	1	1	0	0	1	1	1	1	1	1
0	271	4/11/2010	0	Diyomat	2	1	1	1	13	1	0	1	1	1	1	0	1	0	1	1	0	0	1	1	0	0	1	0	0	0	1	1
0	272	4/11/2010	0	Diyomat	2	1	1	0	13	1	1	0	1	1	1	0	0	1	1	0		0	1	0	0	0	1	0	1	0	0	1
0	273	4/11/2010	0	Diyomat	2	1	1	1	14	1	0	0	0	1	1	0	0	1	0	1	0	1	0			0	1	0	0	1	1	1
0	274	4/11/2010	0	Diyomat	2	1	1	0	13	1	1	1	1	1	1	0	1	0	1	1	0	0	1	0	0	0	1	0	0	1	1	1
0	275	4/11/2010	0	Diyomat	2	1	1	1	13	0				1	1	0	1	0	1	0		0	1	0	0	1	1	0	1	0	1	0
0	276	4/11/2010	0	Diyomat	2	1	1	1	14	1	1	0	0	1	0	1	0	1	1	0		0	1	0	0	1	1	1	0	0	0	1
0	277	4/11/2010	0	Diyomat	2	1	1	1	15	1	0	1	0	1	0	1	0	0	1	1	0	0	1	1	0	1	1	0	1	0	1	1
0	278	4/11/2010	0	Diyomat	2	1	1	1	13	1	0	0	0	1	0	1	1	1	1	0		0	1	1	0	1	1	0	0	0	0	0
0	279	4/11/2010	0	Diyomat	2	1	1	0	13	1	1	0	1	1	1	0	1	1	1	1	0	0	0			0	1	0	0	0	1	1
0	280	4/11/2010	0	Diyomat	2	1	1	1	13	0				1	1	0	1	1	0	1	0	0	1	1	0	1	1	0	1	0	1	1
0	281	4/11/2010	0	Diyomat	2	1	1	0	14	0				1	1	0	1	0	1	0		0	1	1	0	1	1	0	0	0	1	0
0	282	4/11/2010	0	Diyomat	2	1	1	0	13	1	1	0	0	1	0	1	1	1	1	1	0	0	1	1	0	1	1	1	1	0	1	1
0	283	4/11/2010	0	Diyomat	2	1	1	0	14	0				1	1	0	1	1	1	0		0	1	0	0	1	1	1	0	0	1	1
0	284	4/11/2010	0	Diyomat	2	1	1	0	14	1	0	0	1	1	0	0	1	1	1	0		1	1	0	0	1	1	1	0	0	0	1
0	285	4/11/2010	0	Diyomat	2	1	1	1	13	1	1	0	1	1	0	1	1	1	1	0		0	1	1	0	1	1	1	0	0	0	1
0	286	4/11/2010	0	Diyomat	2	1	1	0	14	1	1	0	1	1	1	0	1	1	1	1	0	0	1	1	0	1	1	1	1	0	0	1
0	287	4/11/2010	0	Diyomat	2	1	1	1	12	1	1	0	1	1	0	1	1	1	1	0		0	1	0	0	1	0	0	0	0	1	1
0	288	4/11/2010	0	Diyomat	2	1	1	1	13	1	1	0	1	1	0	1	0	1	1	1	0	0	1	0	0	0	1	0	0	1	1	0
0	289	4/11/2010	0	Diyomat	2	1	1	1	13	1	0	0	1	1	0	1	1	1	1	0		0	1	1	0	0	1	1	0	1	1	0
0	290	4/11/2010	0	Diyomat	2	1	1	0	13	0				1	1	0	1	1	1	0		0	1	1	0	1	0	1	0	0	1	1
0	291	4/11/2010	0	Diyomat	2	1	1	1	14	0				1	1	0	1	1	1	0		0	1	1	0	1	1	1	1	0	1	0
0	292	4/11/2010	0	Diyomat	2	1	1	0	13	1	0	1	1	1	1	0	1	1	1	0		1	1	0	0	0	0	0	1	1	1	1
0	293	4/11/2010	0	Diyomat	2	1	1	0	14	0				1	1	0	1	1	1	1	1	0	0			1	1	0	0	0	0	1
0	294	4/11/2010	0	Diyomat	2	1	1	0	13	1	0	0	1	1	0	1	1	0	1	0		0	1	0	0	1	1	1	0	0	0	1
0	295	4/11/2010	0	Diyomat	2	1	1	0	14	0				1	1	0	1	1	1	0		0	0			1	0	1	0	1	1	0
0	296	4/11/2010	0	Diyomat	2	1	1	1	13	0				1	1	0	1	0	1	0		0	1	0	0	1	1	0	1	0	1	0
0	297	4/11/2010	0	Diyomat	2	1	1	1	13	1	1	1	1	1	1	0	1	1	1	0		0	1	0	0	1	1	1	0	0	1	1
0	298	4/11/2010	0	Diyomat	2	1	1	1	13	1	0	1	1	1	1	0	1	1	1	0		0	1	1	0	0	0	0	0	1	1	0
0	299	4/11/2010	0	Diyomat	2	1	1	0	13	1	0	1	1	1	1	0	1	1	1	0		1	1	0	0	0	1	1	1	0	1	0
0	300	4/11/2010	0	Diyomat	2	1	1	0	14	0				1	1	0	1	1	1	0		0	0			0	1	1	1	0	1	0
0	301	4/11/2010	0	Diyomat	2	1	1	0	13	1	0	1	1	1	1	0	1	1	1	0		0	1	1	0	0	1	1	0	0	1	0
0	302	4/11/2010	0	Diyomat	2	1	1	1	13	1	0	1	1	1	1	0	1	0	1	0		0	1	0	0	1	1	0	0	0	1	0
0	303	4/11/2010	0	Diyomat	2	1	1	1	13	1	1	1	1	1	0	1	1	1	1	0		0	1	1	0	1	1	0	0	0	0	0
0	304	4/11/2010	0	Diyomat	2	1	1	1	13	0				1	0	1	1	1	1	0		0	1	1	0	1	1	1	0	0	0	1
0	305	4/11/2010	0	Diyomat	2	1	1	1	14	0				1	0	1	1	1	1	0		0	1	0	0	1	1	1	1	0	1	0
0	679	15/11/2010	0	Dongobesh	3	0	1	0	15	1	0	1	1	1	1	0	1	1	1	0		0	1	0	0	0	0	0	0	1	1	1
0	680	15/11/2010	0	Dongobesh	3	0	1	1	13	1	1	0	1	1	1	0	1	1	1	1	0	0	1	1	0	1	1	1	0	1	1	1
0	681	15/11/2010	0	Dongobesh	3	0	1	1	14	1	0	1	1	1	0	1	1	1	1	1	0	0	1	0	0	1	1	1	0	0	0	1
0	682	15/11/2010	0	Dongobesh	3	0	1	0	12	1	0	0	1	1	1	0	1	1	1	1	1	0	1	1	0	0	1	0	0	1	1	1
0	683	15/11/2010	0	Dongobesh	3	0	1	0	13	1	0	0	1	1	1	0	0	1	1	0		0	1	1	0	1	1	0	0	1	0	1
0	684	15/11/2010	0	Dongobesh	3	0	1	1	15	0				1	0	0	0	1	1	0		0	1	1	0	1	1	0	1	0	1	1
0	685	15/11/2010	0	Dongobesh	3	0	1	1	14	1	0	1	1	1	0	1	1	1	1	0		0	1	0	0	1	1	1	1	0	1	0
0	686	15/11/2010	0	Dongobesh	3	0	1	1	14	0				1	0	0	0	1	1	0		0	0			1	1	1	1	0	1	0
0	687	15/11/2010	0	Dongobesh	3	0	1	1	14	1	1	0	0	1	1	0	1	1	1	0		1	1	1	0	1	1	1	1	0	1	0
0	688	15/11/2010	0	Dongobesh	3	0	1	1	13	1	1	0	1	1	1	0	1	1	1	1	1	0	1	1	0	0	1	0	1	0	1	1
0	689	15/11/2010	0	Dongobesh	3	0	1	1	14	1	0	1	1	1	1	0	1	1	1	0		0	1	1	0	1	1	1	1	0	1	1
0	690	15/11/2010	0	Dongobesh	3	0	1	0	14	0				1	1	0	1	1	1	1	0	0	1	1	0	1	1	1	1	0	1	1
0	691	15/11/2010	0	Dongobesh	3	0	1	0	12	1	1	1	1	1	0	1	0	1	0	0		0	1	1	0	0	0	0	1	0	1	1
0	692	15/11/2010	0	Dongobesh	3	0	1	1	14	1	1	0	1	1	1	0	1	1	1	1	1	0	1	1	0	1	1	1	1	0	0	0
0	693	15/11/2010	0	Dongobesh	3	0	1	1	12	1	1	0	1	1	1	1	0	1	1	1	0	0	1	1	0	1	1	1	0	1	1	0
0	694	15/11/2010	0	Dongobesh	3	0	1	0	12	1	0	1	0	1	1	0	0	1	1	1	0	0	1	1	0	1	1	1	1	1	1	1
0	695	15/11/2010	0	Dongobesh	3	0	1	1	13	1	1	0	1	1	1	0	1	0	0	0		0	1	1	0	1	1	1	1	1	1	1
0	696	15/11/2010	0	Dongobesh	3	0	1	1	14	0				1	1	0	1	1	1	1	0	0	1	1	0	1	1	1	1	1	0	1
0	697	15/11/2010	0	Dongobesh	3	0	1	1	15	0				1	0	1	0	1	1	1	1	1	1	1	0	1	0	1	1	0	1	1
0	698	15/11/2010	0	Dongobesh	3	0	1	1	14	1	1	1	1	1	1	0	1	1	0	0		0	1	0	0	1	1	1	1	0	1	1
0	699	15/11/2010	0	Dongobesh	3	0	1	1	15	0				1	1	0	1	1	1	1	1	0	1	1	0	1	1	1	1	1	0	1
0	700	15/11/2010	0	Dongobesh	3	0	1	0	13	1	0	1	0	1	1	0	1	1	1	1	0	0	1	1	0	1	1	1	0	0	1	1
0	701	15/11/2010	0	Dongobesh	3	0	1	1	13	0				1	1	0	1	0	1	0		0	1	1	0	1	1	1	1	0	1	1
0	702	15/11/2010	0	Dongobesh	3	0	1	0	14	1	0	1	1	1	1	0	1	1	1	0		0	1	1	0	1	1	1	1	1	1	1
0	703	15/11/2010	0	Dongobesh	3	0	1	1	15	1	0	0	1	1	1	1	1	0	1	1	0	0	1	0	0	1	1	1	1	0	0	1
0	704	15/11/2010	0	Dongobesh	3	0	1	1	13	1	1	1	1	1	1	1	1	1	1	1	1	0	1	1	0	1	0	0	1	0	0	1
0	705	15/11/2010	0	Dongobesh	3	0	1	0	14	1	1	1	1	1	1	1	1	1	1	0		0	1	1	0	1	1	1	1	0	0	1
0	706	15/11/2010	0	Dongobesh	3	0	1	0	14	1	0	0	1	1	0	1	1	1	1	1	1	0	1	1	0	1	1	1	1	1	1	1
0	707	15/11/2010	0	Dongobesh	3	0	1	1	14	0				1	0	1	1	0	1	0		0	1	1	0	1	1	1	1	1	1	1
0	708	15/11/2010	0	Dongobesh	3	0	1	1	14	0				0									0			0	0	0	1	0	0	1
0	709	15/11/2010	0	Dongobesh	3	0	1	1	13	1	0	0	1	1	1	0	1	1	1	1	0	0	1	1	0	0	0	0	1	0	1	1
0	710	15/11/2010	0	Dongobesh	3	0	1	0	15	1	1	1	1	1	1	0	1	1	1	0		0	1	1	0	1	1	1	0	1	1	1
0	711	15/11/2010	0	Dongobesh	3	0	1	0	15	1	0	0	1	1	1	1	1	1	1	0		0	1	0	0	0	1	1	1	0	1	0
0	712	15/11/2010	0	Dongobesh	3	0	1	0	14	1	0	0	1	1	0	0	0	1	1	0		0	1	1	0	1	1	1	1	0	1	1
0	713	15/11/2010	0	Dongobesh	3	0	1	1	14	1	0	1	1	1	1	0	0	1	1	1	0	1	1	1	0	1	1	1	1	1	1	1
0	714	15/11/2010	0	Dongobesh	3	0	1	1	14	1	1	0	0	1	1	0	1	1	1	1	0	0	1	0	0	1	1	0	0	0	1	1
0	715	15/11/2010	0	Dongobesh	3	0	1	1	13	1	1	0	1	1	1	0	1	1	1	0		0	0			1	1	0	0	1	1	1
0	716	15/11/2010	0	Dongobesh	3	0	1	1	13	1	0	1	1	1	1	0	1	1	1	0		0	0			1	1	0	0	1	1	1
0	717	15/11/2010	0	Dongobesh	3	0	1	1	14	1	0	1	1	1	1	0	1	1	1	0		0	0			1	1	1	1	1	1	1
0	805	15/11/2010	0	Dongobeshi_Chini	4	0	1	0	12	1	0	1	1	1	1	0	1	1	1	0		0	0			0	0	0	1	1	1	1
0	806	15/11/2010	0	Dongobeshi_Chini	4	0	1	0	15	0				1	1	0	1	1	1	0		0	1	0	0	1	1	0	0	0	1	0
0	807	15/11/2010	0	Dongobeshi_Chini	4	0	1	0	12	0				1	1	0	1	1	1	0	0	0	0			1	1	0	1	0	1	0
0	808	15/11/2010	0	Dongobeshi_Chini	4	0	1	1	13	0				0									1	1	0	0	1	0	0	1	1	1
0	809	15/11/2010	0	Dongobeshi_Chini	4	0	1	1	13	0				1	1	0	1	0	1	1	0	0	1	1	0	1	1	1	1	0	1	1
0	810	15/11/2010	0	Dongobeshi_Chini	4	0	1	1	14	0				1	1	1	0	0	0	1	0	1	1	0	0	0	1	1	0	1	1	1
0	811	15/11/2010	0	Dongobeshi_Chini	4	0	1	0	13	0				1	1	0	1	1	1	0		0	1	1	0	0	1	0	1	0	1	1
0	812	15/11/2010	0	Dongobeshi_Chini	4	0	1	0	14	0				1	1	0	1	1	1	0		0	0			1	1	0	1	0	1	0
0	813	15/11/2010	0	Dongobeshi_Chini	4	0	1	1	12	0				0									1	1	0	1	0	0	0	0	1	0
0	814	15/11/2010	0	Dongobeshi_Chini	4	0	1	0	14	1	0	1	1	1	1	1	0	0	0	0		0	1	1	0	1	1	0	1	0	0	0
0	815	15/11/2010	0	Dongobeshi_Chini	4	0	1	0	15	0				1	0	1	1	1	1	0		0	0			0	1	0	1	0	1	0
0	816	15/11/2010	0	Dongobeshi_Chini	4	0	1	1	12	0				0									1	1	0	1	1	0	0	0	1	1
0	817	15/11/2010	0	Dongobeshi_Chini	4	0	1	1	13	0				0									1	1	0	0	0	0	0	0	1	1
0	818	15/11/2010	0	Dongobeshi_Chini	4	0	1	0	12	0				1	1	0	1	1	1	1	1	0	1	1	0	0	0	0	0	1	0	1
0	819	15/11/2010	0	Dongobeshi_Chini	4	0	1	1	13	1	0	0	1	1	1	1	1	0	1	0		0	1	1	0	1	1	0	1	1	1	0
0	820	15/11/2010	0	Dongobeshi_Chini	4	0	1	1	13	0				0									1	1	0	0	1	0	1	1	1	1
0	821	15/11/2010	0	Dongobeshi_Chini	4	0	1	1	14	0				0									1	1	0	0	0	0	1	1	1	1
0	822	15/11/2010	0	Dongobeshi_Chini	4	0	1	0	12	0				1	0	1	0	1	1	1	0	0	1	1	0	1	1	0	1	1	1	1
0	823	15/11/2010	0	Dongobeshi_Chini	4	0	1	1	13	0				1	1	0	1	1	1	0		0	1	1	0	1	1	0	1	0	1	1
0	824	15/11/2010	0	Dongobeshi_Chini	4	0	1	1	13	0				1	1	0	0	1	1	0		0	1	1	0	1	0	0	1	0	1	1
0	825	15/11/2010	0	Dongobeshi_Chini	4	0	1	1	14	1	0	0	1	1	1	1	0	0	0	1	0	0	1	0	0	1	1	0	1	0	1	1
0	826	15/11/2010	0	Dongobeshi_Chini	4	0	1	1	12	0				1	1	0	0	1	1	1	0	0	1	1	0	1	1	0	1	0	1	1
0	827	15/11/2010	0	Dongobeshi_Chini	4	0	1	1	14	0				1	1	0	0	0	0	1	0	0	0			0	1	0	1	0	1	1
0	828	15/11/2010	0	Dongobeshi_Chini	4	0	1	1	14	0				1	1	0	0	0	1	1	0	0	1	1	0	0	1	0	0	0	1	1
0	829	15/11/2010	0	Dongobeshi_Chini	4	0	1	1	12	0				1	1	1	1	1	1	0		0	1	0	0	0	0	0	0	0	1	1
0	830	15/11/2010	0	Dongobeshi_Chini	4	0	1	0	14	0				1	0	1	0	1	0	1	0	0	1	1	0	0	0	0	1	0	1	1
0	831	15/11/2010	0	Dongobeshi_Chini	4	0	1	0	12	0				1	1	0	1	1	0	1	1	0	1	1	0	0	0	0	0	1	0	1
0	832	15/11/2010	0	Dongobeshi_Chini	4	0	1	0	12	0				1	1	0	1	1	1	0		0	1	1	0	1	0	0	1	1	1	1
0	833	15/11/2010	0	Dongobeshi_Chini	4	0	1	1	14	0				1	1	0	0	1	1	0		0	1	1	0	0	1	0	1	0	1	1
0	834	15/11/2010	0	Dongobeshi_Chini	4	0	1	1	13	1	1	0	0	1	1	0	0	1	0	0		0	1	1	0	1	1	1	0	0	1	0
0	835	15/11/2010	0	Dongobeshi_Chini	4	0	1	1	12	0				1	1	0	0	1	0	0		0	1	1	0	1	1	0	1	0	1	1
0	836	15/11/2010	0	Dongobeshi_Chini	4	0	1	1	13	0				1	1	0	0	1	1	0		0	1	1	0	0	1	1	0	1	1	0
0	837	15/11/2010	0	Dongobeshi_Chini	4	0	1	1	12	1	0	1	1	1	1	0	1	0	1	0		0	1	0	0	1	1	0	1	1	1	0
0	838	15/11/2010	0	Dongobeshi_Chini	4	0	1	1	12	0				1	0	1	1	1	0	0		1	0			0	1	0	0	0	1	1
0	839	15/11/2010	0	Dongobeshi_Chini	4	0	1	1	13	1	0	0	1	1	1	0	0	1	1	1	0	0	1	1	0	0	1	0	0	1	1	1
0	840	15/11/2010	0	Dongobeshi_Chini	4	0	1	1	12	1	0	1	1	1	1	0	1	1	1	0		0	1	0	0	0	1	0	1	0	1	1
0	841	15/11/2010	0	Dongobeshi_Chini	4	0	1	1	15	1	0	0	1	1	1	0	1	1	1	1	0	0	1	1	0	0	1	1	1	1	1	1
0	842	15/11/2010	0	Dongobeshi_Chini	4	0	1	1	15	0				1	1	0	0	1	1	0		0	1	1	0	1	1	0	1	0	1	1
0	843	15/11/2010	0	Dongobeshi_Chini	4	0	1	1	13	0				1	1	0	1	0	0	0		0	0			1	1	0	1	0	0	0
0	844	15/11/2010	0	Dongobeshi_Chini	4	0	1	1	12	1	1	0	1	1	1	0	1	1	1	0		0	1	0	0	1	1	0	0	1	1	0
0	762	19/11/2010	0	Endamilay	5	1	1	0	16	0				1	1	0	1	1	1	1	0	0	1	1	0	1	1	0	0	1	0	0
0	763	19/11/2010	0	Endamilay	5	1	1	0	15	0				1	1	0	1	1	1	1	0	0	1	1	0	1	1	1	0	1	0	0
0	764	19/11/2010	0	Endamilay	5	1	1	0	15	0				1	1	0	1	1	1	0		0	1	0	0	1	1	1	0	1	0	1
0	765	19/11/2010	0	Endamilay	5	1	1	0	14	0				1	1	1	0	1	1	0		0	1	0	0	1	1	1	1	1	1	1
0	766	19/11/2010	0	Endamilay	5	1	1	1	13	0				1	1	1	1	1	1	0		0	1	0	0	1	1	1	0	0	1	1
0	767	19/11/2010	0	Endamilay	5	1	1	1	14	0				1	1	0	0	1	1	0		0	1	0	0	1	1	0	0	1	0	1
0	768	19/11/2010	0	Endamilay	5	1	1	1	14	0				1	1	1	0	1	0	0		0	1	0	0	0	1	1	0	1	1	0
0	769	19/11/2010	0	Endamilay	5	1	1	1	14	1	0	1	1	1	1	0	1	1	1	0		0	1	0	0	1	1	1	1	0	1	0
0	770	19/11/2010	0	Endamilay	5	1	1	1	14	1	0	0	0	1	1	0	1	0	1	1	0	0	0			1	1	1	1	0	1	0
0	771	19/11/2010	0	Endamilay	5	1	1	1	15	0				1	0	1	0	1	1	1	0	0	1	1	0	1	1	1	0	0	1	1
0	772	19/11/2010	0	Endamilay	5	1	1	1	14	1	1	1	1	1	0	1	1	1	1	1	0	0	1	1	0	1	1	1	1	1	1	1
0	773	19/11/2010	0	Endamilay	5	1	1	1	15	0				1	1	0	1	0	1	1	0	0	1	1	0	1	1	1	0	0	0	1
0	774	19/11/2010	0	Endamilay	5	1	1	1	14	1	0	0	1	1	0	1	1	1	1	0		1	1	1	0	1	1	1	0	1	1	0
0	775	19/11/2010	0	Endamilay	5	1	1	1	15	1	0	0	1	1	1	1	0	1	1	1	0	0	1	0	0	1	1	1	1	0	1	0
0	776	19/11/2010	0	Endamilay	5	1	1	1	15	1	0	0	1	1	0	1	1	1	1	1	0	0	1	0	0	1	1	1	1	0	0	1
0	777	19/11/2010	0	Endamilay	5	1	1	1	15	1	1	0	1	1	1	1	0	1	1	0		0	1	1	0	1	1	1	1	1	1	1
0	778	19/11/2010	0	Endamilay	5	1	1	1	15	1	0	1	1	1	1	0	0	1	0	1	0	0	1	1	0	1	1	1	1	0	1	0
0	779	19/11/2010	0	Endamilay	5	1	1	1	14	1	0	1	1	1	1	0	1	1	1	0		0	1	1	0	1	1	1	1	0	1	0
0	780	19/11/2010	0	Endamilay	5	1	1	1	14	1	0	0	1	1	0	1	1	1	1	0		0	1	0	0	1	1	1	0	0	1	0
0	781	19/11/2010	0	Endamilay	5	1	1	1	15	1	1	0	1	1	1	0	1	1	1	0		0	1	0	0	1	1	1	0	0	1	0
0	782	19/11/2010	0	Endamilay	5	1	1	1	14	1	0	0	1	1	1	0	1	1	1	1	0	0	1	0	0	1	1	1	0	0	1	1
0	783	19/11/2010	0	Endamilay	5	1	1	1	15	1	1	0	0	1	1	0	1	1	1	0	1	0	1	1	0	1	1	1	0	0	1	0
0	784	19/11/2010	0	Endamilay	5	1	1	0	15	0				1	1	0	1	1	1	0		0	1	1	0	0	1	0	1	1	1	1
0	785	19/11/2010	0	Endamilay	5	1	1	0	16	1	0	1	1	1	1	1	1	1	1	0		0	1	1	0	1	1	0	1	1	1	1
0	786	19/11/2010	0	Endamilay	5	1	1	0	15	1	0	1	1	1	0	1	1	1	1	1	0	0	1	1	0	1	1	1	0	0	1	1
0	787	19/11/2010	0	Endamilay	5	1	1	1	14	0				1	1	1	1	1	1	1	1	0	1	0	0	1	1	0	0	1	1	1
0	788	19/11/2010	0	Endamilay	5	1	1	1	14	0				1	1	0	1	1	1	1	1	0	1	1	0	1	1	1	0	0	1	1
0	789	19/11/2010	0	Endamilay	5	1	1	1	15	1	0	1	1	1	1	0	1	1	0	0		0	1	1	0	1	1	1	0	0	1	0
0	790	19/11/2010	0	Endamilay	5	1	1	0	15	1	0	0	0	1	1	0	0	1	1	1	0	0	1	1	0	1	1	1	1	0	1	1
0	791	19/11/2010	0	Endamilay	5	1	1	0	16	1	0	0	0	1	1	0	1	1	1	0		1	1	1	0	1	1	0	0	0	0	1
0	792	19/11/2010	0	Endamilay	5	1	1	0	15	1	0	0	0	1	1	0	0	1	1	0		0	1	1	0	1	1	1	0	0	0	1
0	793	19/11/2010	0	Endamilay	5	1	1	1	13	1	0	0	1	1	1	0	1	1	1	0		0	1	0	0	1	1	1	0	0	1	1
0	794	19/11/2010	0	Endamilay	5	1	1	1	15	1	0	0	1	1	1	0	1	1	1	1	0	0	1	0	0	1	1	0	0	0	1	1
0	795	19/11/2010	0	Endamilay	5	1	1	1	14	1	0	1	1	1	1	0	1	1	1	1	0	0	1	0	0	1	1	1	1	0	1	0
0	796	19/11/2010	0	Endamilay	5	1	1	1	14	1	0	0	1	1	1	0	0	1	1	0		0	1	0	0	1	1	1	1	0	1	1
0	797	19/11/2010	0	Endamilay	5	1	1	1	14	0				1	1	0	1	1	1	1	1	1	1	0	0	1	1	1	0	1	1	1
0	798	19/11/2010	0	Endamilay	5	1	1	1	14	0				1	1	1	1	1	0	0		1	1	0	0	1	1	1	1	0	1	1
0	799	19/11/2010	0	Endamilay	5	1	1	1	13	1	0	0	0	1	0	1	1	1	0	0		0	1	1	0	1	1	1	1	1	1	1
0	800	19/11/2010	0	Endamilay	5	1	1	1	15	0				1	1	0	1	1	1	1	1	0	1	0	0	1	1	1	1	1	1	1
0	801	19/11/2010	0	Endamilay	5	1	1	1	13	1	0	1	0	1	0	1	1	1	0	0		1	1	1	0	1	1	1	1	1	1	1
0	802	19/11/2010	0	Endamilay	5	1	1	0	16	0				1	1	0	0	1	0	1	0	0	1	0	0	1	1	0	0	1	1	1
0	803	19/11/2010	0	Endamilay	5	1	1	1	14	1	0	1	1	1	1	0	1	1	1	1	1	0	1	0	0	1	1	1	0	0	1	0
0	2422	4/11/2010	0	Garbabi	6	1	1	1	14	0				1	1	1	1	1	1	0		0	1	0	0	1	1	1	0	0	0	1
0	2423	4/11/2010	0	Garbabi	6	1	1	0	13	0				1	0	1	0	1	0	0		0	1	1	0	1	0		1	0	1	1
0	2424	4/11/2010	0	Garbabi	6	1	1	0	14	0				1	1	0	1	1	1	1	0	0	0			1	1	1	1	0	0	1
0	2425	4/11/2010	0	Garbabi	6	1	1	0	16	1	0	1	1	0				4					0			1	1	1	1	1	1	0
0	2426	4/11/2010	0	Garbabi	6	1	1	1	14	0				1	1	0	1	1	1	0		0	1	1	0	0	0	0	1	0	1	1
0	2427	4/11/2010	0	Garbabi	6	1	1	0	16	0				1	1	1	1	1	1	1	0	0	1	0	0	1	1	1	1	1	1	1
0	2428	4/11/2010	0	Garbabi	6	1	1	1	13	1	1	0	0	1	1	0	1	1	1	1	0	0	0			1	1	1	1	1	1	1
0	2429	4/11/2010	0	Garbabi	6	1	1	0	14	0				1	1	0	1	1	1	1	0	0	0			1	1	1	1	1	1	1
0	2430	4/11/2010	0	Garbabi	6	1	1	1	15	0				0				4					0			1	1	1	1	1	1	1
0	2431	4/11/2010	0	Garbabi	6	1	1	1	13	0				1	1	1	1	1	1	1	0	0	0			1	1	1	1	1	1	1
0	2432	4/11/2010	0	Garbabi	6	1	1	1	13	1	0	0	1	1	1	0	1	1	1	1	0	0	0			0	0	0	1	1	1	1
0	2433	4/11/2010	0	Garbabi	6	1	1	0	14	1	0	1	0	1	1	0	1	1	1	0		0	0			1	1	1	1	1	1	1
0	2434	4/11/2010	0	Garbabi	6	1	1	0	14	1	1	0	1	0									1	0	0	1	0	0	1	1	1	1
0	2435	4/11/2010	0	Garbabi	6	1	1	0	15	0				1	1	1	1	1	1	1	1	0	1	1	0	1	1	1	0	1	1	1
0	2436	4/11/2010	0	Garbabi	6	1	1	0	13	0				1	1	0	1	1	1	0		0	1	1	0	1	1	1	0	1	1	1
0	2437	4/11/2010	0	Garbabi	6	1	1	1	14	0				1	1	0	1	1	1	1	1	0	1	1	0	1	1	1	1	0	1	1
0	2438	4/11/2010	0	Garbabi	6	1	1	1	14	0				1	1	1	1	0	0	0		0	1	1	0	1	1	1	1	1	1	1
0	2439	4/11/2010	0	Garbabi	6	1	1	0	12	0				1	1	0	1	1	1	0		0	1	0	0	0	0	1	0	0	0	1
0	2440	4/11/2010	0	Garbabi	6	1	1	1	13	1	1	0	1	1	0	0	1	1	1	0		0	1	1	0	1	1	1	0	0	1	1
0	2441	4/11/2010	0	Garbabi	6	1	1	1	13	0				1	1	0	1	1	1	1	1	0	0			1	1	1	0	0	1	1
0	2442	4/11/2010	0	Garbabi	6	1	1	1	13	1	1	0	1	1	1	0	1	1	1	0		0	0			1	1	1	1	1	1	1
0	2443	4/11/2010	0	Garbabi	6	1	1	0	16	0				1	1	0	1	1	1	0		0	0			1	1	1	0	1	1	1
0	2444	4/11/2010	0	Garbabi	6	1	1	0	13	0				1	1	1	1	1	1	0		0	1	1	0	1	1	1	1	1	1	1
0	2445	4/11/2010	0	Garbabi	6	1	1	1	15	0				1	1	0	1	1	1	0		0	1	1	0	1	1	1	1	0	0	1
0	2446	4/11/2010	0	Garbabi	6	1	1	1	14	1	1	1	1	1	1	0	1	1	1	1	0	0	1	1	0	1	1	1	1	0	1	1
0	2447	4/11/2010	0	Garbabi	6	1	1	1	13	1	1	0	1	1	0	1	0	0	0	0		0	1	1	0	0	0		0	0	1	1
0	2448	4/11/2010	0	Garbabi	6	1	1	0	13	0				0									1	1	0	0	1	1	0	1	1	1
0	2449	4/11/2010	0	Garbabi	6	1	1	1	13	0				1	1	0	1	1	1	1	1	0	0			1	1	1	0	1	1	1
0	2450	4/11/2010	0	Garbabi	6	1	1	1	13	0				1	1	0	0	1	1	1	1	0	0			1	1	1	0	1	1	1
0	2451	4/11/2010	0	Garbabi	6	1	1	0	13	0				1	1	0	0	1	1	1	1	0	0			1	1	1	1	0	1	1
0	2452	4/11/2010	0	Garbabi	6	1	1	0	14	1	0	0	1	1	1	0	1	1	1	0		0	1	0	0	0	1	1	0	0	1	1
0	2453	4/11/2010	0	Garbabi	6	1	1	0	13	0				1	1	1	0	1	1	1	1	0	1	1	0	1	1	1	0	0	1	1
0	2454	4/11/2010	0	Garbabi	6	1	1	0	13	0				1	1	0	1	1	1	0		1	0			1	1	1	1	0	1	1
0	2455	4/11/2010	0	Garbabi	6	1	1	1	13	0				1	1	1	1	1	1	0		0	1	1	0	1	1	1	0	0	0	1
0	2456	4/11/2010	0	Garbabi	6	1	1	1	13	1	0	1	1	1	1	0	1	1	1	0		0	0			1	1	1	0	0	1	1
0	2457	4/11/2010	0	Garbabi	6	1	1	0	13	0				1	1	0	1	1	1	0		0	0			1	1	1	1	1	0	1
0	2458	4/11/2010	0	Garbabi	6	1	1	0	13	0				1	1	0	0	1	1	1	1	0	1	1	0	1	1	1	1	0	1	1
0	2459	4/11/2010	0	Garbabi	6	1	1	1	15	1	0	1	0	1	1	0	1	1	1	1	1	0	0	1	0	1	1	1	0	1	1	1
0	2460	4/11/2010	0	Garbabi	6	1	1	1	14	1	0	0	1	1	1	0	1	1	1	1	1	0	1	0	0	1	1	1	1	0	1	1
0	2461	4/11/2010	0	Garbabi	6	1	1	0	15	1	1	0	1	0				4					1	1	0	1	1	1	1	0	1	1
0	2462	4/11/2010	0	Garbabi	6	1	1	1	13	0				1	0	1	1	1	1	0		0	1	1	0	1	1	1	0	0	0	1
0	2463	4/11/2010	0	Garbabi	6	1	1	1	13	0				1	1	0	1	1	1	1	1	0	0			1	1	1	1	0	1	0
0	2464	4/11/2010	0	Garbabi	6	1	1	1	13	0				1	1	1	1	1	1	1	0	0	0			1	1	1	0	1	1	1
0	2465	4/11/2010	0	Garbabi	6	1	1	1	15	1	0	1	0	1	1	1	1	1	1	0		0	0			1	1	1	1	0	0	1
0	2466	4/11/2010	0	Garbabi	6	1	1	1	14	1	1	0	1	1	1	1	0	1	1	0		0	1	1	0	1	0		1	0	1	0
0	519	8/11/2010	0	Gehandu	7	1	1	1	13	0				1	1	0	0	1	0	0		0	0			0	1	0	0	1	0	1
0	520	8/11/2010	0	Gehandu	7	1	1	1	14	1	0	0	1	1	1	1	1	1	1	0		0	1	1	0	1	1	1	1	1	1	0
0	521	8/11/2010	0	Gehandu	7	1	1	1	15	1	1	1	1	1	1	1	1	1	1	0		0	1	1	0	1	1	1	1	0	0	1
0	522	8/11/2010	0	Gehandu	7	1	1	0	13	0				1	1	0	1	1	1	0		0	0			1	1	1	0	0	1	1
0	523	8/11/2010	0	Gehandu	7	1	1	1	13	1	1	0	1	1	1	0	1	0	1	0		1	1	1	0	1	1	1	1	0	1	1
0	524	8/11/2010	0	Gehandu	7	1	1	0	16	1	1	1	1	1	1	0	1	1	1	0		0	1	1	0	1	1	1	1	0	1	1
0	525	8/11/2010	0	Gehandu	7	1	1	1	14	1	1	0	1	1	1	0	0	1	1	0		0	0			1	1	1	1	0	1	1
0	526	8/11/2010	0	Gehandu	7	1	1	0	17	1	0	1	1	1	1	0	1	1	1	0		0	1	1	0	1	0	1	0	1	1	1
0	527	8/11/2010	0	Gehandu	7	1	1	1	13	1	0	1	1	1	1	0	0	1	1	0		0	1	1	0	1	1	0	0	0	1	1
0	528	8/11/2010	0	Gehandu	7	1	1	0	15	0				1	0	1	1	0	0	0		0	1	1	0	0	1	1	0	0	0	1
0	529	8/11/2010	0	Gehandu	7	1	1	1	13	1	1	0	1	1	1	0	1	1	1	0		0	1	1	0	1	1	1	0	0	1	0
0	530	8/11/2010	0	Gehandu	7	1	1	1	13	0				1	1	0	1	0	1	0		0	0	1	0	1	1	1	1	0	1	0
0	531	8/11/2010	0	Gehandu	7	1	1	0	14	1	1	1	1	1	1	1	1	1	1	0		1	1	0	0	1	0	0	1	0	1	1
0	532	8/11/2010	0	Gehandu	7	1	1	0	12	1	0	1	1	1	1	1	1	1	1	0		1	1	1	0	1	1	1	1	1	1	1
0	533	8/11/2010	0	Gehandu	7	1	1	0	13	1	1	0	1	1	1	0	0	1	1	1	1	0	1	1	0	1	1	1	0	0	0	1
0	534	8/11/2010	0	Gehandu	7	1	1	0	13	1	1	1	1	1	0	0	1	0	1	1	1	0	1	0	0	1	1	1	1	1	1	1
0	535	8/11/2010	0	Gehandu	7	1	1	1	15	1	0	1	1	1	1	1	1	1	1	1	0	0	1	1	0	1	1	0	0	1	1	1
0	536	8/11/2010	0	Gehandu	7	1	1	1	13	1	1	1	0	1	1	0	1	1	0	0		0	0			1	1	0	1	0	0	1
0	537	8/11/2010	0	Gehandu	7	1	1	1	13	0				1	1	0	0	1	1	0		0	1	1	0	1	1	1	0	0	0	0
0	538	8/11/2010	0	Gehandu	7	1	1	1	15	1	1	0	1	1	1	1	1	1	0	0		0	1	1	0	1	1	1	1	0	1	1
0	539	8/11/2010	0	Gehandu	7	1	1	1	14	1	1	0	1	1	1	0		1	1	0		0	1	1	0	1	1	1	0	0	1	1
0	540	8/11/2010	0	Gehandu	7	1	1	1	13	1	1	0	1	0									0			0	1	1	0	0	1	1
0	541	8/11/2010	0	Gehandu	7	1	1	0	16	1	0	1	0	1	1	0	1	1	1	0		0	1	1	0	1	1	1	1	1	1	1
0	542	8/11/2010	0	Gehandu	7	1	1	1	12	1	0	1	1	1	1	0	1	1	1	0		0	1	1	0	0	0	1	0	0	1	1
0	543	8/11/2010	0	Gehandu	7	1	1	0	15	1	1	0	1	0									1	1	0	1	1	0	0	0	1	0
0	544	8/11/2010	0	Gehandu	7	1	1	1	14	1	1	1	1	1	1	0	1	1	1	0		0	1	0	0	0	1	1	0	0	1	1
0	545	8/11/2010	0	Gehandu	7	1	1	0	12	0				1	1	0	0	1	0	0		0	1	1	0	0	1	0	0	0	1	1
0	546	8/11/2010	0	Gehandu	7	1	1	1	14	0				1	1	0	1	0	1	0		0	1	1	0	0	0	1	0	0	0	1
0	547	8/11/2010	0	Gehandu	7	1	1	1	13	1	1	1	1	1	0	1	0	1	1	1	1	0	0			1	1	1	0	0	1	0
0	548	8/11/2010	0	Gehandu	7	1	1	1	14	0				1	1	1	1	1	0	0		0	1	1	0	1	1	0	0	0	0	1
0	549	8/11/2010	0	Gehandu	7	1	1	1	12	1	1	0	1	1	1	0	1	1	1	1	1	0	1	1	0	0	1	1	0	0	1	1
0	550	8/11/2010	0	Gehandu	7	1	1	0	15	1	0	1	1	1	0	1	0	1	0	0		0	1	0	0	1	1	1	1	0	0	1
0	551	8/11/2010	0	Gehandu	7	1	1	0	13	1	0	1	1	1	1	0	1	1	1	1	1	0	1	1	0	1	1	1	1	0	0	1
0	162	16/11/2010	0	Gibdiyo	8	0	0	0	15	1	1	0	1	1	1	1	1	1	1	0			0			0	0	0	1	0	1	0
0	163	16/11/2010	0	Gibdiyo	8	0	0	1	13	0				1	0	1	1	1	1	0		0	0			1	1	0	0	0	0	1
0	164	16/11/2010	0	Gibdiyo	8	0	0	1	12	1	0	1	1	1	0	1	0	1	1	0		0	1	0	0	1	0	0	1	0	1	0
0	165	16/11/2010	0	Gibdiyo	8	0	0	1	15	1	1	0	0	1	1	0	1	1	1	0		0	1	1	0	1	1	1	1	0	1	0
0	166	16/11/2010	0	Gibdiyo	8	0	0	1	13	1	0	0	1	1	1	1	1	1	1	0		0	1	1	0	0	1	0	1	1	0	1
0	167	16/11/2010	0	Gibdiyo	8	0	0	0	13	1	0	0	1	1	1	0	1	1	1	0		0	0	0	0	1	0	1	0	1	0	1
0	168	16/11/2010	0	Gibdiyo	8	0	0	0	12	1	0	1	1	1	1	0	1	1	1	0		1	0			1	1	1	0	1	0	1
0	169	16/11/2010	0	Gibdiyo	8	0	0	0	13	1	0	1	0	1	1	0	1	1	1	0		0	1	1	0	1	1	1	0	0	1	0
0	170	16/11/2010	0	Gibdiyo	8	0	0	1	14	1	0	1	1	1	1	1	1	1	1	0		0	1	1	0	1	1	1	0	1	1	0
0	171	16/11/2010	0	Gibdiyo	8	0	0	1	13	1	0	1	1	1	0	1	1	1	0	0		0	1	0	0	1	0	1	0	0	1	1
0	172	16/11/2010	0	Gibdiyo	8	0	0	0	15	1	0	0	1	1	1	1	0	1	1	0		0	0			1	1	1	0	1	1	1
0	173	16/11/2010	0	Gibdiyo	8	0	0	1	13	1	0	0	1	1	1	0	1	1	1	0		1	1	1	0	1	1	1	1	1	1	1
0	174	16/11/2010	0	Gibdiyo	8	0	0	0	14	1	0	0	1	1	1	1	1	1	1	0		0	1	1	0	1	1	1	1	1	0	1
0	175	16/11/2010	0	Gibdiyo	8	0	0	1	13	1	0	1	1	1	1	0	0	1	0	0		0	1	1	0	0	0	0	1	0	1	0
0	176	16/11/2010	0	Gibdiyo	8	0	0	1	13	1	1	1	1	1	0	1	1	0	1	0		0	1	1	0	1	0	0	1	0	0	1
0	177	16/11/2010	0	Gibdiyo	8	0	0	1	14	1	0	1	1	1	1	0	1	0	1	0		0	0			0	1	1	1	1	1	1
0	178	16/11/2010	0	Gibdiyo	8	0	0	1	12	1	1	1	1	1	0	1	1	1	1	0		0	1	1	0	0	0	0	1	0	0	1
0	179	16/11/2010	0	Gibdiyo	8	0	0	0	18	1	0	1	1	1	1	0	1	1	1	0		0	0			1	1	0	1	0	0	1
0	180	16/11/2010	0	Gibdiyo	8	0	0	1	13	1	0	0	1	1	1	0	1	1	1	0		0	0			1	0	0	1	0	1	1
0	181	16/11/2010	0	Gibdiyo	8	0	0	0	15	1	0	1	1	1	1	1	1	1	1	0		0	1	1	0	1	1	1	1	0	1	1
0	182	16/11/2010	0	Gibdiyo	8	0	0	0	14	0				1	1	0	1	1	1	0		0	1	1	0	1	1	1	0	0	0	0
0	183	16/11/2010	0	Gibdiyo	8	0	0	1	13	1	1	0	1	1	1	1	1	1	0	0		0	1	0	0	1	1	1	1	0	1	1
0	184	16/11/2010	0	Gibdiyo	8	0	0	1	13	1	0	1	0	1	1	0	1	1	0	0		1	1	0	0	1	1	1	1	0	1	1
0	185	16/11/2010	0	Gibdiyo	8	0	0	0	13	1	0	1	0	1	1	0	0	1	0	0		1	0			1	1	1	1	0	1	1
0	186	16/11/2010	0	Gibdiyo	8	0	0	0	15	1	0	0	1	1	1	1	1	1	1	0		0	0			1	1	1	0	1	0	1
0	187	16/11/2010	0	Gibdiyo	8	0	0	0	15		1	1	1	1	0	1	1	1	1	0		0	1	0	0	1	1	1	0	1	1	1
0	188	16/11/2010	0	Gibdiyo	8	0	0	1	14	1	0	1	1	1	1	0	0	1	0	0		0	1	1	0	1	1	0	1	0	1	0
0	189	16/11/2010	0	Gibdiyo	8	0	0	0	14	1	1	0	1	1	0	1	1	1	1	1	0	0	1	0	0	1	1	0	1	1	1	0
0	190	16/11/2010	0	Gibdiyo	8	0	0	1	16	1	1	0	1	1	0	1	1	1	1	1	0	0	1	1	0	1	1	1	1	1	1	0
0	191	16/11/2010	0	Gibdiyo	8	0	0	0	14	0				1	1	0	1	1	0	1	1	0	1	1	0	1	1	1	1	0	0	1
0	192	16/11/2010	0	Gibdiyo	8	0	0	0	12	0				1	1	0	1	1	0	0		0	0			1	1	1	1	0	1	1
0	193	16/11/2010	0	Gibdiyo	8	0	0	1	15	0				1	1	0	0	1	0	0		0	1	0	0	1	1	1	1	1	1	1
0	194	16/11/2010	0	Gibdiyo	8	0	0	1	15	1	0	0	1	1	1	0	1	1	0	0		0	0			1	1	1	1	1	1	1
0	195	16/11/2010	0	Gibdiyo	8	0	0	1	13	1	0	1	1	1	1	0	1	1	1	0		0	0			0	1	0	1	1	1	1
0	196	16/11/2010	0	Gibdiyo	8	0	0	1	13	0				1	1	0	1	1	1	0		0	1	0	0	1	1	1	1	1	1	1
0	197	16/11/2010	0	Gibdiyo	8	0	0	1	14	1	0	1	1	1	1	0	1	1	0	0		0	1	1	0	1	1	1	1	1	1	1
0	198	16/11/2010	0	Gibdiyo	8	0	0	1	14	1	1	0	1	1	1	0	1	1	1	0		0	1	1	0	1	1	1	1	1	1	1
0	199	16/11/2010	0	Gibdiyo	8	0	0	1	13	1	1	0	0	1	1	0	0	1	0	1	0	0	1	1	0	1	1	0	1	1	1	1
0	200	16/11/2010	0	Gibdiyo	8	0	0	1	16	1	0	0	1	1	0	1	0	1	0	0		0	0			1	1	1	1	0	1	1
0	201	16/11/2010	0	Gibdiyo	8	0	0	1	16	1	0	0	1	1	0	1	0	1	0	0		0	0			1	0	1	1	0	1	0
0	202	16/11/2010	0	Gibdiyo	8	0	0	1	13	1	0	1	0	1	0	1	1	1	1	0		0	0			1	0	0	1	1	1	1
0	203	16/11/2010	0	Gibdiyo	8	0	0	0	13	0				1	1	0	1	1	0	0		0	1	1	0	1	0	1	1	0	1	1
0	204	16/11/2010	0	Gibdiyo	8	0	0	1	14	1	0	0	1	1	1	0	1	0	1	0		0	0			1	1	1	1	0	0	1
0	205	16/11/2010	0	Gibdiyo	8	0	0	0	13	1	0	1	1	1	1	1	1	1	1	0		0	0			1	0	1	1	0	1	1
0	718	15/11/2010	0	Gidhim	9	1	1	0	14	0				1	1	0	0	0	1	0		0	1	1	0	1	0	0	1	1	1	1
0	719	15/11/2010	0	Gidhim	9	1	1	1	12	0				1	1	0	1	1	1	0		0	0			0	1	0	1	1	0	1
0	720	15/11/2010	0	Gidhim	9	1	1	1	13	1	1	0	1	1	0	1	0	1	0	1	0	0	0			0	1	0	1	1	1	1
0	721	15/11/2010	0	Gidhim	9	1	1	1	15	0				1	1	1	1	1	1	1	1	0	1	1	0	1	1	1	1	1	1	1
0	722	15/11/2010	0	Gidhim	9	1	1	1	17	0				1	1	0	1	1	1	0		0	1	1	0	1	1	1	1	1	1	1
0	723	15/11/2010	0	Gidhim	9	1	1	1	13	0				1	1	1	1	1	1	0		0	0			0	0	0	1	1	1	1
0	724	15/11/2010	0	Gidhim	9	1	1	1	17	0				1	1	0	1	1	1	0		0	1	1	0	1	1	1	1	1	1	1
0	725	15/11/2010	0	Gidhim	9	1	1	1	14	0				1	1	1	1	1	1	0		0	1	1	0	1	1	0	1	0	1	0
0	726	15/11/2010	0	Gidhim	9	1	1	0	14	0				1	1	0	1	1	1	0		0	0			1	1	0	1	0	0	1
0	727	15/11/2010	0	Gidhim	9	1	1	0	14	0				1	1	0	1	1	1	1	0	0	1	0	0	1	1	1	1	0	1	1
0	728	15/11/2010	0	Gidhim	9	1	1	0	13	1	1	1	1	1	1	1	1	1	1	0		0	1	1	0	1	0	1	0	1	1	1
0	729	15/11/2010	0	Gidhim	9	1	1	1	13	0				1	1	0	1	1	0	0		0	0			1	1	1	0	0	1	0
0	730	15/11/2010	0	Gidhim	9	1	1	1	14	1	1	0	1	1	1	1	1	1	0	0		0	0			0	1	0	1	1	0	0
0	731	15/11/2010	0	Gidhim	9	1	1	0	14	1	0	1	1	1	1	0	1	1	0	0		0	1	0	0	1	1	1	0	1	0	1
0	732	15/11/2010	0	Gidhim	9	1	1	1	14	0				1	1	0	1	1	1	0		0	0			1	1	1	1	1	1	1
0	733	15/11/2010	0	Gidhim	9	1	1	1	13	0				1	1	0	1	1	1	0		0	0			1	1	1	1	0	1	1
0	734	15/11/2010	0	Gidhim	9	1	1	0	15	1	1	1	1	1	0	1	0	0	0	0		0	1	1	0	0	0	0	1	0	1	0
0	735	15/11/2010	0	Gidhim	9	1	1	0	13	0				1	1	1	1	1	0	0		0	1	1	0	1	1	1	0	0	0	1
0	736	15/11/2010	0	Gidhim	9	1	1	0	14	1	1	0	0	1	1	0	1	1	1	0		0	0			1	1	0	1	0	0	1
0	737	15/11/2010	0	Gidhim	9	1	1	0	13	0				1	1	0	1	1	1	0		1	0			1	1	0	1	0	0	1
0	738	15/11/2010	0	Gidhim	9	1	1	1	14	0				1	0	1	1	0	0	0		0	0			0	1	1	0	0	1	1
0	739	15/11/2010	0	Gidhim	9	1	1	1	13	0				1	1	0	1	1	1	0		0	0			1	1	0	1	1	1	1
0	740	15/11/2010	0	Gidhim	9	1	1	0	14	1	1	0	0	1	1	0	1	1	1	0		0	0			1	1	0	1	0	0	1
0	741	15/11/2010	0	Gidhim	9	1	1	1	13	0				1	0	1	0	1	1	1	0	0	0			0	1	0	1	0	0	1
0	742	15/11/2010	0	Gidhim	9	1	1	1	15	0				1	1	0	1	1	1	0		0	1	0	0	1	1	1	1	0	1	1
0	743	15/11/2010	0	Gidhim	9	1	1	1	13	0				1	0	1	0	0	0	0		0	1	0	0	0	0	0	0	1	1	1
0	744	15/11/2010	0	Gidhim	9	1	1	1	14	1	0	1	1	1	1	0	1	1	1	0		0	1	0	0	1	1	1	1	1	1	1
0	745	15/11/2010	0	Gidhim	9	1	1	1	12	0				1	1	1	0	1	1	1	1	1	1	1	0	1	1	1	0	1	1	1
0	746	15/11/2010	0	Gidhim	9	1	1	1	13	0				1	1	0	0	1	1	1	1	0	0			1	1	1	0	0	1	1
0	747	15/11/2010	0	Gidhim	9	1	1	1	14	1	0	0	1	1	1	0	1	1	0	1	1	0	0			1	1	1	1	0	1	1
0	748	15/11/2010	0	Gidhim	9	1	1	1	14	0				1	0	0	0	1	1	1	0	0	0			1	1	0	1	0	0	1
0	750	15/11/2010	0	Gidhim	9	1	1	1	18	0				1	1	0	1	1	1	0		0	1	1	0	1	1	1	0	1	1	1
0	751	15/11/2010	0	Gidhim	9	1	1	1	13	0				1	1	0	1	1	1	0		0	1	1	0	1	1	0	0	1	1	1
0	752	15/11/2010	0	Gidhim	9	1	1	1	13	1	0	1	0	1	1	0	1	1	1	0		0	0			1	0	0	1	1	1	1
0	753	15/11/2010	0	Gidhim	9	1	1	1	13	0				1	1	0	1	1	1	0		0	1	1	0	0	0	0	1	1	1	1
0	754	15/11/2010	0	Gidhim	9	1	1	1	13	0				1	1	0	1	1	1	0		0	0			1	0	0	1	0	1	1
0	755	15/11/2010	0	Gidhim	9	1	1	1	13	0				1	1	0	1	1	1	0		0	1	1	0	0	0	0	1	1	1	1
0	756	15/11/2010	0	Gidhim	9	1	1	1	13	1	1	1	1	1	1	0	1	1	1	0		0	0			1	1	1	1	1	1	1
0	757	15/11/2010	0	Gidhim	9	1	1	1	14	0				1	0	1	1	1	1	0		1	1	1	0	1	1	1	1	1	1	1
0	758	15/11/2010	0	Gidhim	9	1	1	1	12	0				1	1	0	1	0	1	0		0	0			0	1	1	1	1	1	1
0	759	15/11/2010	0	Gidhim	9	1	1	1	13	0				1	1	0	1	1	0	0		1	0			1	1	0	0	1	0	1
0	760	15/11/2010	0	Gidhim	9	1	1	0	15	1	0	0	1	1	1	0	0	1	1	1	1	0	1	0	0	1	1	1	1	0	0	1
0	761	15/11/2010	0	Gidhim	9	1	1	1	13	0				1	1	0	1	1	1	0		0	0			1	1	0	1	0	0	0
0	598	18/18/2010	0	Gidmadoy	10	0	0	1	15	1	0	1	1	1	0	1	1	1	0	1	0	0	0			0	1	1	1	0	1	1
0	599	18/18/2010	0	Gidmadoy	10	0	0	0	15	0				1	1	0	1	1	1	0		0	0			1	0	1	1	1	0	0
0	600	18/18/2010	0	Gidmadoy	10	0	0	0	16	0				1	1	0	0	1	1	1	0	0	1	1	0	1	1	1	1	1	1	1
0	601	18/18/2010	0	Gidmadoy	10	0	0	0	13	0				1	1	0	1	1	0	0		1	1	1	0	0	1	0	1	1	1	1
0	602	18/18/2010	0	Gidmadoy	10	0	0	0	16	1	0	1	1	1	1	1	1	1	1	0		0	1	0	0	1	1	1	1	0	1	1
0	603	18/18/2010	0	Gidmadoy	10	0	0	1	15	0				1	1	1	1	1	1	0		0	0			0	0	0	1	0	1	1
0	604	18/18/2010	0	Gidmadoy	10	0	0	0	15	1	0	1	1	1	1	1	1	1	1	0		0	1	1	0	1	1	1	1	1	1	1
0	605	18/18/2010	0	Gidmadoy	10	0	0	0	12	1	1	1	1	1	1	0	0	0	0	1	0	0	1	1	0	1	1	1	0	0	0	1
0	606	18/18/2010	0	Gidmadoy	10	0	0	1	13	0				1	1	0	0	0	1	0		0	0			0	0	0	1	0	0	0
0	607	18/18/2010	0	Gidmadoy	10	0	0	0	13	1	1	0	1	1	0	1	1	0	1	0		0	1	1	0	1	1	0	1	0	0	1
0	608	18/18/2010	0	Gidmadoy	10	0	0	1	15	1	0	1	1	1	1	0	1	1	1	1	0	1	1	0	0	1	1	1	1	1	1	0
0	609	18/18/2010	0	Gidmadoy	10	0	0	1	14	1	0	0	1	1	1	1	1	1	1	0		0	0			1	1	0	1	1	1	1
0	610	18/18/2010	0	Gidmadoy	10	0	0	1	15	0				1	1	1	1	0	1	0		0	1	1	0	1	1	0	1	1	1	0
0	611	18/18/2010	0	Gidmadoy	10	0	0	0	15	1	0	1	1	1	1	0	1	1	1	0		0	1	0	0	1	1	1	1	1	1	1
0	612	18/18/2010	0	Gidmadoy	10	0	0	0	12	1	1	0	0	1	0	1	0	0	0	1	0	0	1	1	0	1	1	1	0	0	1	1
0	613	18/18/2010	0	Gidmadoy	10	0	0	1	16	0				1	1	1	1	1	1	0		0	1	1	0	1	1	1	1	1	1	0
0	614	18/18/2010	0	Gidmadoy	10	0	0	0	13	0				1	1	1	1	1	0	0		0	1	1	0	1	1	1	0	1	1	1
0	615	18/18/2010	0	Gidmadoy	10	0	0	0	12	1	0	0	1	1	1	0	1	1	0	0		0	1	1	0	0	1	1	1	0	1	1
0	616	18/18/2010	0	Gidmadoy	10	0	0	1	14	1	0	0	0	1	0	1	0	1	0	0		0	0			0	1	0	0	1	1	1
0	617	18/18/2010	0	Gidmadoy	10	0	0	0	16	0				1	0	1	0	1	1	0		0	0			0	0	1	0	0	0	0
0	618	18/18/2010	0	Gidmadoy	10	0	0	0	12	1	0	0	0	1	1	0	1	0	1	0		0	0			1	1	1	0	0	1	1
0	619	18/18/2010	0	Gidmadoy	10	0	0	1	15	0				1	0	1	1	1	1	1		0	1	0	0	0	0	0	1	0	1	1
0	620	18/18/2010	0	Gidmadoy	10	0	0	1	14	1	0	0	1	1	1	0	0	1	0	1	1	0	1	1	0	1	1	1	0	0	0	1
0	621	18/18/2010	0	Gidmadoy	10	0	0	0	13	0				1	1	1	1	1	1	0		0	1	1	0	0	1	0	1	1	1	1
0	622	18/18/2010	0	Gidmadoy	10	0	0	1	14	1	0	0	0	1	0	1	0	1	0	0		0	0			0	1	1	0	1	1	1
0	623	18/18/2010	0	Gidmadoy	10	0	0	1	13	1	0	1	1	1	1	0	1	1	1	0		0	1	0	0	1	1	1	0	0	1	0
0	624	18/18/2010	0	Gidmadoy	10	0	0	1	15	0				1	1	0	0	1	1	0		0	0			1	1	0	0	0	0	0
0	625	18/18/2010	0	Gidmadoy	10	0	0	0	13	1	1	0	1	1	1	0	1	0	0	0		0	1	1	0	1	1	1	0	0	1	0
0	626	18/18/2010	0	Gidmadoy	10	0	0	0	13	1	1	0	0	1	1	0	0	0	0	1	1	0	0			1	1	1	0	0	1	1
0	407	8/11/2010	0	Gwandumehhi	11	1	1	0	17	1	0	0	0	1	1	1	1	1	1	1	1	0	1	1	0	1	1	1	1	1	1	1
0	408	8/11/2010	0	Gwandumehhi	11	1	1	0	16	1	0	0	0	1	1	0	1	1	1	0		0	1	0	0	1	1	1	0	1	1	1
0	409	8/11/2010	0	Gwandumehhi	11	1	1	0	17	1	0	1	0	1	1	0	1	1	1	0		0	1	0	0	1	1	1	1	0	1	1
0	410	8/11/2010	0	Gwandumehhi	11	1	1	1	16	1	0	1	1	1	1	0	1	1	1	0		0	1	1	0	0	1	0	1	0	1	0
0	411	8/11/2010	0	Gwandumehhi	11	1	1	1	12	1	1	1	1	1	0	1	1	1	0	0		0	1	0	0	0	1	1	0	0	1	1
0	412	8/11/2010	0	Gwandumehhi	11	1	1	1	12	1	0	1	1	1	1	0	1	1	1	0		0	1	1	0	1	1	1	1	1	1	1
0	413	8/11/2010	0	Gwandumehhi	11	1	1	1	16	1	0	1	0	1	1	0	1	1	1	0		0	1	0	0	1	0	1	1	0	1	1
0	414	8/11/2010	0	Gwandumehhi	11	1	1	0	13	1	0	1	1	1	1	0	1	1	1	1	1	0	1	0	0	1	1	1	0	0	1	1
0	415	8/11/2010	0	Gwandumehhi	11	1	1	0	13	0				1	1	0	1	1	1	0		0	1	1	0	1	0	0	0	0	0	1
0	416	8/11/2010	0	Gwandumehhi	11	1	1	0	18	1	1	0	1	1	0	1	1	1	1	1	0	0	1	1	0	1	1	1	0	1	1	1
0	417	8/11/2010	0	Gwandumehhi	11	1	1	0	13	1	0	0	1	1	1	0	1	1	0	0		0	1	0	0	1	1	1	0	0	1	1
0	418	8/11/2010	0	Gwandumehhi	11	1	1	1	15	1	1	1	1	1	1	0	1	1	1	0		0	1	0	0	0	0	0	1	0	1	1
0	419	8/11/2010	0	Gwandumehhi	11	1	1	1	13	1	0	0	1	1	1	0	1	1	1	0		0	0			1	1	0	0	0	0	0
0	420	8/11/2010	0	Gwandumehhi	11	1	1	1	15	1	0	0	1	1	1	0	1	1	1	1	0	0	1	1	0	0	1	1	0	0	0	1
0	421	8/11/2010	0	Gwandumehhi	11	1	1	1	15	1	1	1	1	0									1	0	0	1	0	0	0	0	1	1
0	422	8/11/2010	0	Gwandumehhi	11	1	1	1	13	1	1	0	1	1	0	1	1	1	1	0		0	1	0	0	0	1	0	0	0	0	0
0	423	8/11/2010	0	Gwandumehhi	11	1	1	1	13	1	1	0	1	1	1	0	1	0	1	0		0	1	0	0	1	1	0	0	0	1	0
0	424	8/11/2010	0	Gwandumehhi	11	1	1	1	14	1	1	0	1	0									0			1	1	1	0	0	0	1
0	425	8/11/2010	0	Gwandumehhi	11	1	1	1	16	1	1	0	1	1	1	0	0	1	1	1	0	0	1	1	0	1	1	1	1	0	1	1
0	2338	17/11/2010	0	Haydom_Pr	12	0	1	0	13	0				1	1	0	1	1	1	0		0	1	1	0	1	0	1	0	1	1	1
0	2339	17/11/2010	0	Haydom_Pr	12	0	1	1	13	1	0	0	1	1	0	1	1	1	1	0		0	1	1	0	0	1	1	0	1	1	0
0	2340	17/11/2010	0	Haydom_Pr	12	0	1	0	14	0				1	1	1	1	1	1	0		0	0			1	0	1	0	1	1	0
0	2341	17/11/2010	0	Haydom_Pr	12	0	1	0	13	1	0	0	1	1	0	1	1	0	1	0		0	1	0	0	1	1	1	0	0	0	1
0	2342	17/11/2010	0	Haydom_Pr	12	0	1	0	14	0				1	1	0	1	1	1	1	1	0	0			1	1	0	0	0	0	1
0	2343	17/11/2010	0	Haydom_Pr	12	0	1	0	13	1	0	1	1	1	1	0	1	1	1	0		1	1	0	0	0	0	0	1	0	1	1
0	2344	17/11/2010	0	Haydom_Pr	12	0	1	1	13	0				1	0	1	1	1	1	0		0	1	0	0	1	1	1	1	0	1	0
0	2345	17/11/2010	0	Haydom_Pr	12	0	1	1	13	0				1	0	1	1	1	1	0		0	1	1	0	1	1	1	0	0	0	1
0	2346	17/11/2010	0	Haydom_Pr	12	0	1	1	13	1	1	1	1	1	0	1	1	1	1	0		0	1	1	0	1	1	0	0	0	0	0
0	2347	17/11/2010	0	Haydom_Pr	12	0	1	1	13	1	0	1	1	1	1	0	1	0	1	0		0	1	0	0	1	1	0	0	0	1	0
0	2348	17/11/2010	0	Haydom_Pr	12	0	1	0	15	0				1	1	0	1	1	1	1	1	0	0			1	1	1	1	0	1	1
0	2349	17/11/2010	0	Haydom_Pr	12	0	1	1	13	1	0	1	1	1	1	0	1	0	1	0		0	1	1	0	1	1	1	0	0	0	1
0	2350	17/11/2010	0	Haydom_Pr	12	0	1	1	14	0				1	1	0	1	1	1	0		0	1	1	0	0	1	1	1	0	1	0
0	2351	17/11/2010	0	Haydom_Pr	12	0	1	1	13	1	0	1	1	1	1	0	1	0	1	1	0	0	1	1	0	0	1	0	0	0	1	1
0	2352	17/11/2010	0	Haydom_Pr	12	0	1	1	14	1	0	0	1	1	1	0	1	1	1	0		0	1	0	0	1	1	1	1	0	1	1
0	2353	17/11/2010	0	Haydom_Pr	12	0	1	1	14	1	0	0	0	1	1	0	1	0	1	1	0	0	1	1	0	0	1	1	1	0	1	1
0	2354	17/11/2010	0	Haydom_Pr	12	0	1	0	13	1	0	1	1	1	1	0	1	1	1	0		0	1	1	0	0	1	1	0	0	1	0
0	2355	17/11/2010	0	Haydom_Pr	12	0	1	0	13	0				1	1	0	1	1	1	0		0	0			0	1	1	1	0	1	1
0	2356	17/11/2010	0	Haydom_Pr	12	0	1	0	13	1	0	1	1	1	1	0	1	1	1	0		1	1	0	0	0	1	1	1	0	1	0
0	2357	17/11/2010	0	Haydom_Pr	12	0	1	0	14	0				1	1	0	1	0	1	0		0	1	1	0	1	1	0	0	0	1	0
0	2358	17/11/2010	0	Haydom_Pr	12	0	1	0	13	1	1	0	1	1	1	0	1	1	1	1	0	0	0			0	1	0	0	0	1	1
0	2359	17/11/2010	0	Haydom_Pr	12	0	1	1	13	0				1	1	0	1	1	0	1	0	0	1	1	0	1	1	0	1	0	1	0
0	2360	17/11/2010	0	Haydom_Pr	12	0	1	0	14	1	1	0	1	1	1	0	1	1	1	1	0	0	1	1	0	1	1	1	1	0	0	1
0	2361	17/11/2010	0	Haydom_Pr	12	0	1	1	13	1	1	0	1	1	0	1	1	1	1	0		0	1	1	0	1	1	1	0	0	0	1
0	2362	17/11/2010	0	Haydom_Pr	12	0	1	0	14	1	0	0	1	1	0	0	1	1	1	0		1	1	0	0	1	1	1	0	0	0	1
0	2363	17/11/2010	0	Haydom_Pr	12	0	1	0	14	0				1	1	0	1	1	1	0		0	1	0	0	1	1	1	1	0	1	1
0	2364	17/11/2010	0	Haydom_Pr	12	0	1	0	13	1	1	0	0	1	0	1	1	1	1	1	0	0	1	1	0	1	1	1	1	0	1	1
0	2365	17/11/2010	0	Haydom_Pr	12	0	1	1	13	1	1	0	1	1	0	1	0	1	1	1	0	0	1	0	0	0	1	0	0	0	1	0
0	2366	17/11/2010	0	Haydom_Pr	12	0	1	1	13	1	1	1	1	1	1	0	1	1	1	0		0	1	0	0	1	1	1	0	0	1	1
0	2367	17/11/2010	0	Haydom_Pr	12	0	1	1	13	0				1	1	0	1	0	1	0		0	1	0	0	1	1	0	1	0	1	0
0	2368	17/11/2010	0	Haydom_Pr	12	0	1	1	13	1	0	1	1	1	1	0	1	1	1	0		0	1	1	0	0	0	0	0	0	1	0
0	2369	17/11/2010	0	Haydom_Pr	12	0	1	0	13	1	0	0	1	1	1	0	0	0	0	1	0	0	0			1	1	1	0	0	1	0
0	2370	17/11/2010	0	Haydom_Pr	12	0	1	1	13	1	0	0	0	1	0	1	1	1	1	1	0	0	1	1	0	1	1	1	1	0	1	1
0	2371	17/11/2010	0	Haydom_Pr	12	0	1	0	13	1	1	1	1	1	1	0	1	0	1	1	0	0	1	0	0	0	1	0	0	0	1	1
0	2372	17/11/2010	0	Haydom_Pr	12	0	1	1	14	1	0	0	0	1	1	0	0	1	0	1	0	1	0			0	1	0	0	0	1	1
0	2373	17/11/2010	0	Haydom_Pr	12	0	1	0	13	1	1	0	1	1	1	0	0	1	1	0		0	1	0	0	0	1	0	1	1	1	1
0	2374	17/11/2010	0	Haydom_Pr	12	0	1	1	13	0				1	1	0	1	0	1	0		0	1	0	0	1	1	0	1	0	1	0
0	2375	17/11/2010	0	Haydom_Pr	12	0	1	1	13	1	0	0	0	1	0	1	1	1	1	0		0	1	1	0	1	1	0	0	0	0	0
0	2376	17/11/2010	0	Haydom_Pr	12	0	1	1	15	1	0	1	0	1	0	1	0	0	1	1	0	0	1	1	0	1	1	0	1	0	1	1
0	2377	17/11/2010	0	Haydom_Pr	12	0	1	1	14	1	1	0	0	1	0	1	0	1	1	0		0	1	0	0	1	1	1	0	0	0	1
0	2378	17/11/2010	0	Haydom_Pr	12	0	1	1	13	1	1	0	1	1	1	0	1	1	1	0		0	1	0	0	1	0	0	0	0	1	1
0	2379	17/11/2010	0	Haydom_Pr	12	0	1	1	14	0				1	1	0	1	1	1	0		0	1	1	0	1	1	1	1	0	1	0
0	1050	10/11/2010	0	Hayloto	13	1	1	1	13	0				1	1	1	1	1	1	0		0	1	1	0	1	1	1	0	1	0	1
0	1051	10/11/2010	0	Hayloto	13	1	1	1	14	0				1	1	0	0	1	0	0		1	0			1	1	0	0	1	1	0
0	1052	10/11/2010	0	Hayloto	13	1	1	1	13	0				1	0	1	0	1	0	0		1	1	1	0	1	1	1	1	0	1	1
0	1053	10/11/2010	0	Hayloto	13	1	1	0	15	1	1	0	1	1	1	1	0	1	1	0		0	0			1	1	0	0	0	1	1
0	1054	10/11/2010	0	Hayloto	13	1	1	1	16	0				1	1	0	1	1	1	0		0	1	1	0	1	1	0	1	0	1	0
0	1055	10/11/2010	0	Hayloto	13	1	1	1	13	1	0	1	1	1	1	0	1	1	1	0		0	0			1	1	0	1	1	1	1
0	1056	10/11/2010	0	Hayloto	13	1	1	1	14	0				1	1	0	0	1	0	0		0	1	1	0	0	0	0	1	1	1	1
0	1057	10/11/2010	0	Hayloto	13	1	1	1	14	1	1	1	1	1	1	0	1	1	1	1	0	0	1	1	0	1	1	0	1	0	0	1
0	1058	10/11/2010	0	Hayloto	13	1	1	0	13	0				1	1	0	1	1	0	0		0	1	0	0	1	1	1	1	1	1	1
0	1059	10/11/2010	0	Hayloto	13	1	1	0	15	0				1	1	1	1	1	1	0	0	1	1	1	0	1	1	1	0	1	1	1
0	1060	10/11/2010	0	Hayloto	13	1	1	1	13	0				1	1	1	0	1	0	0		0	0			0	1	0	1	0	0	0
0	1061	10/11/2010	0	Hayloto	13	1	1	0	14	0				1	1	0	1	1	1	1	0	0	0			1	0	0	1	0	0	0
0	1062	10/11/2010	0	Hayloto	13	1	1	1	13	0				1	1	0	1	1	1	1	0	0	1	1	0	1	1	1	1	1	1	1
0	1063	10/11/2010	0	Hayloto	13	1	1	1	16	0				1	1	0	0	1	0	0		0	1	1	0	0	1	1	1	0	1	0
0	1064	10/11/2010	0	Hayloto	13	1	1	1	17	0				1	1	0	1	1	1	0		0	1	1	0	1	1	1	1	1	1	0
0	1065	10/11/2010	0	Hayloto	13	1	1	0	12	0				1	1	0	1	0	1	0		1	1	1	0	1	1	1	1	0	1	1
0	1066	10/11/2010	0	Hayloto	13	1	1	1	14	1	1	0	1	1	1	0	0	1	0	1	0	0	0			1	1	1	0	0	1	1
0	1067	10/11/2010	0	Hayloto	13	1	1	1	13	0				1	1	0	1	1	1	0		0	1	1	0	1	1	1	1	1	0	1
0	1068	10/11/2010	0	Hayloto	13	1	1	1	14	0				1	1	1	1	1	1	0		0	1	1	0	1	1	0	1	0	1	1
0	1069	10/11/2010	0	Hayloto	13	1	1	0	16	1	1	0	1	1	1	0	1	1	1	0		0	0			1	1	0	0	0	1	0
0	1070	10/11/2010	0	Hayloto	13	1	1	0	15	0				1	1	1	0	1	1	0		0	1	1	0	1	1	1	0	0	1	0
0	1071	10/11/2010	0	Hayloto	13	1	1	0	14	0				1	0	1	0	0	1	1	0	0	1	1	0	1	1	1	1	0	1	0
0	1072	10/11/2010	0	Hayloto	13	1	1	0	16	1	1	1	1	1	1	1	1	1	1	0		0	1	1	0	1	1	1	1	0	0	1
0	1073	10/11/2010	0	Hayloto	13	1	1	1	13	1	1	1	1	1	1	0	1	1	1	0		0	0			1	1	0	0	0	1	0
0	1074	10/11/2010	0	Hayloto	13	1	1	1	15	0				1	1	0	0	1	1	0		0	1	1	0	1	1	1	1	1	1	0
0	1075	10/11/2010	0	Hayloto	13	1	1	0	12	1	0	1	1	1	1	0	1	1	0	0		0	1	1	0	1	1	0	1	1	1	0
0	1076	10/11/2010	0	Hayloto	13	1	1	1	12	1	1	0	1	1	1	0	0	1	1	0		0	0			1	1	0	1	0	1	1
0	1077	10/11/2010	0	Hayloto	13	1	1	0	15	1	0	1	1	1	0	1	1	1	1	0		0	1	1	0	1	1	1	1	0	1	1
0	1078	10/11/2010	0	Hayloto	13	1	1	1	13	1	0	1	1	1	1	1	0	1	1	0		0	1	1	0	1	1	1	1	1	1	0
0	1079	10/11/2010	0	Hayloto	13	1	1	0	15	1	1	1	1	1	1	0	0	1	1	0		0	1	1	0	1	1	1	0	0	1	1
0	1080	10/11/2010	0	Hayloto	13	1	1	0	15	0				1	1	1	1	1	1	0		0	1	1	0	1	1	0	1	1	1	1
0	1081	10/11/2010	0	Hayloto	13	1	1	0	14	0				1	0	1	1	1	0	1	0	0	1	1	0	1	1	0	1	1	1	1
0	1082	10/11/2010	0	Hayloto	13	1	1	1	13	0				1	1	0	0	1	0	0		0	1	1	0	1	1	1	1	1	1	1
0	1083	10/11/2010	0	Hayloto	13	1	1	1	13	0				1	1	0	0	1	1	0		0	1	1	0	1	1	0	0	0	1	1
0	1084	10/11/2010	0	Hayloto	13	1	1	1	14	0				1	1	0	1	1	1	0		0	1	1	0	1	1	1	1	0	1	1
0	1085	10/11/2010	0	Hayloto	13	1	1	0	13	1	1	1	0	1	1	1	0	1	1	0		0	0			1	1	1	1	0	1	0
0	1086	10/11/2010	0	Hayloto	13	1	1	1	13	1	0	0	1	1	1	1	0	1	1	0		0	1	1	0	1	1	1	1	0	1	0
0	1087	10/11/2010	0	Hayloto	13	1	1	0	14	0				1	0	1	0	1	1	1	1	0	0			1	1	1	1	0	1	1
0	1088	10/11/2010	0	Hayloto	13	1	1	1	15	1	0	0	0	1	0	1	0	1	0	0		0	0			1	1	1	0	0	0	0
0	1089	10/11/2010	0	Hayloto	13	1	1	0	13	0				1	1	1	1	1	1	1	0	0	0			1	1	1	1	1	1	0
0	1090	10/11/2010	0	Hayloto	13	1	1	0	15	1	0	1	1	1	1	1	1	1	0	1	0	0	1	1	0	1	1	1	1	1	1	1
0	2304	3/11/2010	0	Jaranjar	14	0	1	1	14	1	0	0	1	1	1	1	1	1	1	1	1	0	1	1	0	1	1	1	1	1	1	1
0	2305	3/11/2010	0	Jaranjar	14	0	1	0	14	0				1	1	0	1	1	1	0		0	1	1	0	1	1	1	0	0	1	1
0	2306	3/11/2010	0	Jaranjar	14	0	1	1	14	1	0	0	1	1	1	0	1	1	1	0		0	1	1	0	1	1	1	1	1	1	1
0	2307	3/11/2010	0	Jaranjar	14	0	1	0	14	1	0	1	1	1	1	1	1	1	1	0		0	1	1	0	1	1	1	0	1	1	1
0	2308	3/11/2010	0	Jaranjar	14	0	1	1	13	0				1	1	0	1	1	1	0		0	1	1	0	1	1	1	1	1	1	1
0	2309	3/11/2010	0	Jaranjar	14	0	1	1	13	0				1	1	0	1	1	1	0		0	1	1	0	1	1	1	1	0	1	1
0	2310	3/11/2010	0	Jaranjar	14	0	1	1	13	1	1	1	1	1	1	1	1	1	1	0		0	1	1	0	1	1	1	1	1	1	0
0	2311	3/11/2010	0	Jaranjar	14	0	1	0	13	0				1	1	0	1	1	1	0		0	1	1	0	1	1	1	0	1	1	1
0	2312	3/11/2010	0	Jaranjar	14	0	1	1	15	1	1	1	1	1	1	1	1	0	1	0		0	1	1	0	0	0	0	1	0	1	1
0	2313	3/11/2010	0	Jaranjar	14	0	1	0	16	0				1	1	0	1	1	1	0		0	1	1	0	1	1	1	1	1	1	1
0	2314	3/11/2010	0	Jaranjar	14	0	1	1	13	0				1	1	1	1	1	1	1	1	0	1	1	0	1	1	0	1	1	1	1
0	2315	3/11/2010	0	Jaranjar	14	0	1	0	13	1	1	0	1	1	1	0	1	1	0	0		0	1	1	0	0	1	1	0	0	1	1
0	2316	3/11/2010	0	Jaranjar	14	0	1	0	13	0				1	1	0	1	0	1	0		0	0			1	0	0	1	0	0	1
0	2317	3/11/2010	0	Jaranjar	14	0	1	0	13	1	1	1	1	1	0	1	0	1	0	0		0	1	0	0	1	1	1	0	0	1	0
0	2318	3/11/2010	0	Jaranjar	14	0	1	0	13	0				1	1	1	1	1	1	1	1	0	1	1	0	1	1	1	1	1	1	1
0	2319	3/11/2010	0	Jaranjar	14	0	1	1	14	0				1	1	0	1	1	1	0		0	1	1	0	1	1	0	1	1	0	1
0	2320	3/11/2010	0	Jaranjar	14	0	1	0	13	0				1	1	1	1	1	1	0		0	1	1	0	1	1	1	1	1	1	1
0	2321	3/11/2010	0	Jaranjar	14	0	1	0	14	0				1	1	0	0	1	1	1	1	0	1	0	0	0	1	1	0	1	1	1
0	2322	3/11/2010	0	Jaranjar	14	0	1	0	14	1	0	1	1	1	1	1	1	1	1	1	1	0	0			0	1	0	0	1	0	1
0	2323	3/11/2010	0	Jaranjar	14	0	1	0	14	0				1	1	1	1	1	1	1	1	0	0			0	0	0	1	1	0	1
0	2324	3/11/2010	0	Jaranjar	14	0	1	1	15	1	0	1	1	1	1	1	1	1	1	0		0	1	1	0	1	1	1	1	1	1	1
0	2325	3/11/2010	0	Jaranjar	14	0	1	1	13	0				1	1	0	1	1	1	0		0	1	1	0	1	1	1	0	0	1	1
0	2326	3/11/2010	0	Jaranjar	14	0	1	0	15	0				1	0	1	1	1	0	0		0	1	1	0	1	1	1	1	1	1	1
0	2327	3/11/2010	0	Jaranjar	14	0	1	1	14	0				1	1	1	1	1	1	0		0	1	1	0	1	1	1	1	1	1	1
0	2328	3/11/2010	0	Jaranjar	14	0	1	0	16	1	0	1	1	1	1	1	0	1	1	0		0	1	1	0	1	1	0	0	0	1	1
0	2329	3/11/2010	0	Jaranjar	14	0	1	0	14	0				1	1	1	1	1	1	1	0	0	1	1	0	0	0	0	0	1	1	1
0	2330	3/11/2010	0	Jaranjar	14	0	1	0	13	0				1	1	0	1	1	1	0		0	1	1	0	1	1	1	1	1	1	1
0	2331	3/11/2010	0	Jaranjar	14	0	1	1	14	0				1	1	0	1	1	1	0		0	1	0	0	1	1	1	1	1	1	1
0	2332	3/11/2010	0	Jaranjar	14	0	1	1	13	1	1	0	1	1	0	1	1	1	1	1	1	0	1	0	0	1	1	1	1	1	1	1
0	2333	3/11/2010	0	Jaranjar	14	0	1	0	13	1	0	1	1	0									1	0	0	1	1	1	0	0	1	1
0	2334	3/11/2010	0	Jaranjar	14	0	1	1	13	0				1	1	0	1	1	1	0		0	1	1	0	1	1	1	1	1	1	1
0	2335	3/11/2010	0	Jaranjar	14	0	1	0	15	0				1	1	1	1	1	1	0		0	1	0	0	1	0	1	0	0	1	1
0	2336	3/11/2010	0	Jaranjar	14	0	1	0	13	0				1	1	0	1	1	1	0		0	1	1	0	1	1	1	1	1	1	1
0	2337	3/11/2010	0	Jaranjar	14	0	1	1	13	0				1	1	0	1	1	1	0		0	1	1	0	1	1	1	1	1	1	1
0	890	11/11/2010	0	Laghangesh	15	1	1	1	13	0				1	1	0	1	1	1	0		0	1	0	0	1	1	1	0	1	1	0
0	891	11/11/2010	0	Laghangesh	15	1	1	0	13	0				1	1	0	1	0	1	0		0	0			1	0	0	1	0	0	1
0	892	11/11/2010	0	Laghangesh	15	1	1	0	13	1	1	0	1	1	1	0	1	1	0	0		0	1	1	0	0	1	1	0	0	1	1
0	893	11/11/2010	0	Laghangesh	15	1	1	0	13	0				1	1	0	1	1	1	0		0	1	1	0	1	1	1	0	0	1	1
0	894	11/11/2010	0	Laghangesh	15	1	1	1	13	1	1	0	1	1	0	1	1	1	1	1	1	0	1	0	0	1	1	1	1	1	1	1
0	895	11/11/2010	0	Laghangesh	15	1	1	0	13	0				1	1	0	1	1	1	1	1	0	1	0	0	1	0	1	0	0	1	1
0	896	11/11/2010	0	Laghangesh	15	1	1	1	15	0				1	1	1	1	0	1	0		0	1	1	0	0	0	0	1	0	1	1
0	897	11/11/2010	0	Laghangesh	15	1	1	0	14	0				1	1	0	1	1	1	1	1	0	1	1	0	0	0	0	0	1	1	1
0	898	11/11/2010	0	Laghangesh	15	1	1	0	16	0				1	1	0	1	1	0	0		0	1	1	0	0	1	1	0	0	1	1
0	899	11/11/2010	0	Laghangesh	15	1	1	0	15	0				1	1	0	1	1	1	0		0	1	0	0	0	1	0	1	1	1	1
0	900	11/11/2010	0	Laghangesh	15	1	1	0	14	0				1	0	1	1	1	1	0		0	1	0	0	0	1	1	1	1	1	1
0	901	11/11/2010	0	Laghangesh	15	1	1	1	17	0				1	1	0	1	1	1	0		0	0			1	1	1	0	0	1	0
0	902	11/11/2010	0	Laghangesh	15	1	1	1	12	0				1	1	0	1	1	0	0		0	0			1	1	1	1	1	1	1
0	903	11/11/2010	0	Laghangesh	15	1	1	0	13	1	0	0	0	1	1	0	1	1	1	0		0	1	1	0	1	0	1	1	0	0	0
0	904	11/11/2010	0	Laghangesh	15	1	1	0	13	0				1	1	0	1	1	1	0		0	1	0	0	1	1	1	1	0	1	1
0	905	11/11/2010	0	Laghangesh	15	1	1	1	14	0				1	1	0	1	1	1	0		0	0			1	0	1	1	0	1	1
0	906	11/11/2010	0	Laghangesh	15	1	1	0	12	1	1	0	0	1	0	1	1	0	1	1	1	0	0			1	1	1	1	1	1	1
0	907	11/11/2010	0	Laghangesh	15	1	1	1	13	0				1	1	1	1	1	1	0		1	1	0	0	1	1	1	1	1	0	0
0	908	11/11/2010	0	Laghangesh	15	1	1	1	12	0				1	1	0	1	0	1	1	0	0	0			0	0	0	1	0	0	1
0	909	11/11/2010	0	Laghangesh	15	1	1	1	13	0				1	1	0	0	0	0	0		0	1	1	0	0	1	0	1	0	1	0
0	910	11/11/2010	0	Laghangesh	15	1	1	1	13	0				1	0	1	1	1	1	0		0	1	0	0	1	0	1	1	1	0	1
0	911	11/11/2010	0	Laghangesh	15	1	1	1	15	0				1	1	0	1	1	1	0		0	1	0	0	0	1	1	1	1	1	1
0	912	11/11/2010	0	Laghangesh	15	1	1	1	14	0				1	1	1	1	1	1	0		0	1	0	0	1	1	1	1	0	1	1
0	913	11/11/2010	0	Laghangesh	15	1	1	1	14	0				1	1	0	1	1	0	0		0	1	0	0	1	1	1	1	1	1	0
0	914	11/11/2010	0	Laghangesh	15	1	1	1	13	1	1	0	1	1	1	1	1	1	1	1	1	0	1	0	0	1	1	1	1	0	1	0
0	915	11/11/2010	0	Laghangesh	15	1	1	1	12	0				1	0	1	0	1	1	0		0	0			0	0	0	1	0	1	1
0	916	11/11/2010	0	Laghangesh	15	1	1	1	13	0				1	1	0	1	1	0	0		0	1	1	0	0	1	1	1	1	1	1
0	917	11/11/2010	0	Laghangesh	15	1	1	1	12	0				1	1	0	0	1	0	0		0	0			1	1	1	1	0	1	1
0	918	11/11/2010	0	Laghangesh	15	1	1	1	13	0				1	1	0	0	1	0	1	0	0	0			1	1	1	1	1	0	1
0	919	11/11/2010	0	Laghangesh	15	1	1	1	14	0				1	1	0	0	0	1	0		0	1	0	0	0	1	0	1	0	1	1
0	920	11/11/2010	0	Laghangesh	15	1	1	1	14	0				1	1	0	1	1	1	0		0	0			0	1	0	1	0	1	1
0	921	11/11/2010	0	Laghangesh	15	1	1	1	12	1	0	0	1	1	1	1	0	1	0	0		0	1	1	0	1	0	1	1	0	1	0
0	922	11/11/2010	0	Laghangesh	15	1	1	1	13	0				1	1	0	0	1	1	0		0	0			0	0	0	1	1	1	1
0	923	11/11/2010	0	Laghangesh	15	1	1	1	14	0				1	1	0	1	1	1	0		0	1	0	0	1	1	1	1	0	1	1
0	924	11/11/2010	0	Laghangesh	15	1	1	1	14	0				1	1	0	1	0	1	0		0	1	0	0	0	1	0	1	1	1	1
0	925	11/11/2010	0	Laghangesh	15	1	1	0	15	0				1	0	1	0	1	1	1	0	0	1	0	0	1	1	0	1	1	0	1
0	926	11/11/2010	0	Laghangesh	15	1	1	0	15	1	0	1	1	1	1	0	1	1	1	0		0	1	0	0	1	1	0	1	0	1	1
0	9	16/11/2010	0	Maretadu_Juu	16	0	0	0	14	0				1	1	0	1	0	0	0		0	0			1	1	1	0	0	0	1
0	10	16/11/2010	0	Maretadu_Juu	16	0	0	0	14	0				1	1	0	1	1	1	0		0	1	1	0	1	1	1	0	0	1	0
0	11	16/11/2010	0	Maretadu_Juu	16	0	0	1	15	1	1	1	1	1	1	1	0	1	1	0		0	0			1	1	1	0	0	1	0
0	12	16/11/2010	0	Maretadu_Juu	16	0	0	0	15	1	1	0	1	1	1	0	0	0	0	0		0	1	0	0	1	1	1	0	1	0	0
0	13	16/11/2010	0	Maretadu_Juu	16	0	0	0	13	0				1	1	0	0	1	1	0		0	1	1	0	1	1	1	0	1	1	0
0	14	16/11/2010	0	Maretadu_Juu	16	0	0	0	14	0				1	1	0	0	1	1	0		1	0			1	1	1	0	1	1	0
0	15	16/11/2010	0	Maretadu_Juu	16	0	0	1	15	0				1	0	1	0	1	1	0		0	1	0	0	1	1	0	1	0	0	1
0	16	16/11/2010	0	Maretadu_Juu	16	0	0	1	16	1	1	0	0	1	1	0	0	0	0	0		0	1	1	0	1	1	1	1	1	1	0
0	17	16/11/2010	0	Maretadu_Juu	16	0	0	0	14	1	1	1	1	1	1	0	1	1	1	0		0	1	1	0	1	1	1	1	1	1	1
0	18	16/11/2010	0	Maretadu_Juu	16	0	0	1	13	0				1	1	0	1	0	1	0		0	0			0	0	0	1	1	1	1
0	19	16/11/2010	0	Maretadu_Juu	16	0	0	0	13	1	0	1	0	1	0	1	0	1	1	0		0	0			1	1	1	0	0	0	1
0	20	16/11/2010	0	Maretadu_Juu	16	0	0	0	14	0				1	1	0	1	1	1	1	1	0	1	1	0	1	1	0	1	1	1	1
0	21	16/11/2010	0	Maretadu_Juu	16	0	0	0	15	0				1	1	0	0	1	1	0		0	0			1	1	1	0	1	1	0
0	22	16/11/2010	0	Maretadu_Juu	16	0	0	1	14	1	0	0	0	1	1	0	0	1	1	0		1	0			0	1	0	0	0	1	0
0	23	16/11/2010	0	Maretadu_Juu	16	0	0	1	15	0				1	1	0	0	1	1	1	0	0	0			1	1	1	1	1	1	1
0	24	16/11/2010	0	Maretadu_Juu	16	0	0	0	14	0				1	1	0	1	1	1	0		1	1	0	0	1	1	1	0	0	1	0
0	25	16/11/2010	0	Maretadu_Juu	16	0	0	1	14	1	1	0	0	1	1	0	0	0	0	1	1	0	1	1	0	1	1	1	1	0	1	0
0	26	16/11/2010	0	Maretadu_Juu	16	0	0	0	13	0				1	1	0	0	1	1	0		0	0			1	1	1	1	1	1	0
0	27	16/11/2010	0	Maretadu_Juu	16	0	0	1	13	1	1	0	1	1	1	0	0	1	1	0		0	0			1	1	0	1	1	1	0
0	28	16/11/2010	0	Maretadu_Juu	16	0	0	0	15	1	1	1	1	1	1	0	1	1	1	0		0	0			1	1	1	0	0	1	1
0	29	16/11/2010	0	Maretadu_Juu	16	0	0	0	17	0				1	1	0	1	1	1	0		0	0			1	1	1	0	1	1	1
0	30	16/11/2010	0	Maretadu_Juu	16	0	0	0	13	0				1	1	0	1	1	1	0		0	1	1	0	1	1	1	0	1	1	1
0	31	16/11/2010	0	Maretadu_Juu	16	0	0	1	13	1	0	1	1	1	0	0	0	1	0	0		0	0			1	0	0	1	0	0	0
0	32	16/11/2010	0	Maretadu_Juu	16	0	0	1	14	0				1	1	0	0	1	1	1	0	0	0			0	1	1	1	1	1	1
0	33	16/11/2010	0	Maretadu_Juu	16	0	0	0	14	1	1	1	1	1	1	0	1	1	1	0		0	0			1	1	1	0	0	1	1
0	34	16/11/2010	0	Maretadu_Juu	16	0	0	0	14	0				1	1	0	0	0	0	0		0	0			1	1	1	1	1	1	0
0	35	16/11/2010	0	Maretadu_Juu	16	0	0	1	14	1	0	0	0	1	0	1	0	1	0	1	1	0	1	0	0	1	0	0	1	0	0	1
0	36	16/11/2010	0	Maretadu_Juu	16	0	0	1	13	1	0	1	1	1	1	0	1	1	0	0		0	1	1	0	0	1	0	1	1	1	0
0	37	16/11/2010	0	Maretadu_Juu	16	0	0	1	14	1	0	0	0	1	1	0	1	1	1	0		0	0			1	1	0	1	0	1	0
0	38	16/11/2010	0	Maretadu_Juu	16	0	0	0	15	1	0	0	1	1	0	0	0	1	0	1	0	0	1	0	0	1	0	0	0	0	0	1
0	39	16/11/2010	0	Maretadu_Juu	16	0	0	1	14	1	0	1	1	1	1	0	1	1	1	0		0	0			1	0	0	0	0	1	1
0	40	16/11/2010	0	Maretadu_Juu	16	0	0	1	14	0				1	1	0	1	0	0	0		0	1	1	0	1	1	1	1	0	0	1
0	41	16/11/2010	0	Maretadu_Juu	16	0	0	1	13	1	1	1	1	1	1	1	1	0	1	1	0	0	1	1	0	1	1	1	0	0	1	1
0	42	16/11/2010	0	Maretadu_Juu	16	0	0	1	14	0				1	1	0	1	1	1	0		0	1	0	0	1	1	0	0	0	1	0
0	43	16/11/2010	0	Maretadu_Juu	16	0	0	0	14	0				1	1	0	0	1	1	0		0	0			1	1	1	1	1	0	0
0	44	16/11/2010	0	Maretadu_Juu	16	0	0	0	15	1	0	1	1	1	0	0	1	1	1	0		0	1	1	0	1	0	0	1	0	0	1
0	45	16/11/2010	0	Maretadu_Juu	16	0	0	0	14	1	0	0	1	1	1	0	1	1	1	0		0	0			1	0	0	0	0	1	1
0	46	16/11/2010	0	Maretadu_Juu	16	0	0	1	13	1	0	1	1	1	1	0	1	1	1	1	0	0	1	0	0	1	1	0	1	0	1	0
0	47	16/11/2010	0	Maretadu_Juu	16	0	0	1	15	1	1	0	1	1	1	0	1	1	1	1	1	0	0			1	1	1	0	0	0	0
0	48	16/11/2010	0	Maretadu_Juu	16	0	0	1	13	0				1	1	0	1	0	1	0		0	1	0	0	1	1	1	1	0	1	1
0	49	16/11/2010	0	Maretadu_Juu	16	0	0	0	13	0				1	1	0	0	0	0	0		0	0			1	0	1	0	1	1	1
0	847	17/11/2010	0	Mewadani	17	1	1	0	13	1	1	0	1	1	1	0	1	1	1	0		0	0			1	0	0	1	0	1	0
0	848	17/11/2010	0	Mewadani	17	1	1	0	14	0				1	0	1	0	1	1	1	1	0	0			1	1	0	1	0	1	1
0	849	17/11/2010	0	Mewadani	17	1	1	0	14	0				1	0	1	1	1	1	1	1	0	0			1	1	0	1	0	1	1
0	850	17/11/2010	0	Mewadani	17	1	1	1	13	1	0	1	1	1	1	0	1	1	0	0		0	0			1	1	1	1	0	1	1
0	851	17/11/2010	0	Mewadani	17	1	1	0	14	0				1	1	0	1	1	1	0		0	1	1	0	0	1	1	0	1	1	0
0	852	17/11/2010	0	Mewadani	17	1	1	0	14	0				1	1	0	1	1	1	1	0	0	0			0	1	0	1	0	0	1
0	853	17/11/2010	0	Mewadani	17	1	1	1	15	0				1	1	0	1	1	1	0		0	1	1	0	0	1	1	1	0	1	1
0	854	17/11/2010	0	Mewadani	17	1	1	1	16	1	0	1	1	1	0	1	1	1	0	0		0	1	0	0	0	0	0	1	0	1	1
0	855	17/11/2010	0	Mewadani	17	1	1	0	13	0				1	1	0	1	1	1	0		0	1	1	0	0	1	1	1	0	1	1
0	856	17/11/2010	0	Mewadani	17	1	1	0	14	0				1	1	0	1	1	1	0		0	1	1	0	1	1	1	1	1	1	1
0	857	17/11/2010	0	Mewadani	17	1	1	1	15	1	0	1	1	1	0	1	1	1	1	0		0	1	0	0	1	1	1	1	0	1	1
0	858	17/11/2010	0	Mewadani	17	1	1	1	15	0				1	1	0	0	1	1	0		0	1	0	0	0	0	0	1	0	1	0
0	859	17/11/2010	0	Mewadani	17	1	1	1	14	0				0									0			0	1	0	1	0	1	1
0	860	17/11/2010	0	Mewadani	17	1	1	1	13	0				1	1	0	1	0	1	0		0	0			0	1	0	0	0	0	1
0	861	17/11/2010	0	Mewadani	17	1	1	0	15	0				1	1	0	0	1	0	0		0	0			0	0	0	0	0	0	0
0	862	17/11/2010	0	Mewadani	17	1	1	0	14	0				1	1	1	1	1	1	0		0	0			0	1	0	1	0	1	0
0	863	17/11/2010	0	Mewadani	17	1	1	1	14	0				1	1	0	1	1	1	0		0	1	1	0	1	1	0	1	0	1	0
0	864	17/11/2010	0	Mewadani	17	1	1	0	15	0				1	1	1	0	1	1	0		0	1	1	0	0	1	0	1	1	1	1
0	865	17/11/2010	0	Mewadani	17	1	1	1	14	1	0	1	0	1	1	0	1	1	1	0		0	1	0	0	0	1	1	1	0	1	1
0	866	17/11/2010	0	Mewadani	17	1	1	0	14	1	1	0	1	1	0	1	1	1	1	0		0	0			1	0	0	1	0	0	1
0	867	17/11/2010	0	Mewadani	17	1	1	1	13	0				1	1	1	0	1	0	0		0	1	1	0	0	0	0	0	0	1	1
0	868	17/11/2010	0	Mewadani	17	1	1	0	13	1	0	1	1	1	1	0	1	1	1	0		0	1	0	0	1	1	0	1	0	0	1
0	869	17/11/2010	0	Mewadani	17	1	1	0	13	0				1	1	0	1	0	0	0		0	1	1	0	0	0	0	0	1	0	1
0	870	17/11/2010	0	Mewadani	17	1	1	1	15	0				1	1	0	1	1	1	1		0	1	1	0	1	1	1	0	0	1	0
0	871	17/11/2010	0	Mewadani	17	1	1	1	14	0				1	1	0	1	1	1	0		0	0			0	1	0	1	1	1	1
0	872	17/11/2010	0	Mewadani	17	1	1	0	14	0				1	1	0	1	1	1	0		0	1	1	0	1	1	1	1	0	1	1
0	873	17/11/2010	0	Mewadani	17	1	1	1	13	0				1	1	0	0	0	1	1	1	0	1		0	0	1	1	1	0	1	1
0	874	17/11/2010	0	Mewadani	17	1	1	1	15	0				1	1	1	1	1	1	0		0	1	1	0	1	1	0	1	0	0	1
0	875	17/11/2010	0	Mewadani	17	1	1	0	14	0				1	1	0	0	1	1	0		0	1	0	0	0	1	1	1	1	1	1
0	876	17/11/2010	0	Mewadani	17	1	1	1	15	0				1	1	1	1	0	1	0		0	1	1	0	0	1	1	0	0	1	1
0	877	17/11/2010	0	Mewadani	17	1	1	1	14	0				1	0	1	1	1	1	0		0	1	1	0	1	1	1	1	0	0	1
0	878	17/11/2010	0	Mewadani	17	1	1	1	13	0				1	1	1	0	1	1	0		0	1	1	0	1	1	1	1	0	1	1
0	879	17/11/2010	0	Mewadani	17	1	1	1	13	0				1	1	0	1	1	1	1	1	0	0			1	1	1	1	0	1	1
0	880	17/11/2010	0	Mewadani	17	1	1	1	15	0				1	0	1	1	1	1	0		0	1	0	0	0	1	0	1	1	0	1
0	881	17/11/2010	0	Mewadani	17	1	1	1	14	0				1	1	0	0	1	1	0		0	1	1	0	0	1	1	1	0	1	1
0	883	17/11/2010	0	Mewadani	17	1	1	1	14	1	0	1	1	1	1	1	1	1	0	0		0	1	0	0	1	1	1	1	1	1	1
0	884	17/11/2010	0	Mewadani	17	1	1	0	15	0				1	1	0	0	1	1	0		0	1	1	0	0	1	1	1	0	1	1
0	885	17/11/2010	0	Mewadani	17	1	1	0	13	0				1	1	0	1	1	1	0		0	0			1	1	0	1	0	0	1
0	886	17/11/2010	0	Mewadani	17	1	1	0	15	0				1	1	0	1	1	1	1	1	0	0			1	1	1	1	1	0	1
0	887	17/11/2010	0	Mewadani	17	1	1	1	14	0				1	1	0	1	1	1	0		0	1	1	0	1	1	0	1	0	0	1
0	888	17/11/2010	0	Mewadani	17	1	1	1	13	1	0	1	1	1	1	0	1	1	1	0		0	0			0	1	0	0	0	0	1
0	889	17/11/2010	0	Mewadani	17	1	1	0	16	0				1	1	0	1	0	0	1	1	0	1	1	0	0	1	1	1	0	0	1
0	930	12/11/2010	0	Mongahay	18	0	1	0	12	0				1	1	1	1	1	1	0		0	1	0	0	1	1	1	0	1	1	1
0	931	12/11/2010	0	Mongahay	18	0	1	1	13	0				1	1	0	1	1	1	0		0	1	0	0	1	1	1	1	1	1	1
0	932	12/11/2010	0	Mongahay	18	0	1	1	13	0				1	1	0	1	1	1	0		0	1	1	0	1	1	1	1	1	1	1
0	933	12/11/2010	0	Mongahay	18	0	1	1	13	0				1	1	1	1	1	1	0		0	1	1	0	1	1	1	1	0	1	1
0	934	12/11/2010	0	Mongahay	18	0	1	0	13	0				1	1	0	1	1	1	1	0	0	1	0	0	1	1	1	0	1	0	1
0	935	12/11/2010	0	Mongahay	18	0	1	0	16	0				1	1	0	1	1	0	1	0	0	1	0	0	1	1	1	1	1	1	1
0	936	12/11/2010	0	Mongahay	18	0	1	1	15	1	0	1	1	1	0	1	1	1	1	0		0	1	0	0	0	1	0	1	0	1	0
0	937	12/11/2010	0	Mongahay	18	0	1	0	14	0				1	1	0	1	1	0	1	0	0	1	0	0	1	1	1	0	1	1	1
0	938	12/11/2010	0	Mongahay	18	0	1	1	13	1	0	1	1	1	1	1	0	1	0	0		0	1	0	0	1	1	1	1	0	1	0
0	939	12/11/2010	0	Mongahay	18	0	1	0	13	0				1	1	0	1	1	1	1	0	0	1	0	0	1	1	1	0	1	1	1
0	940	12/11/2010	0	Mongahay	18	0	1	1	15	0	0	0	1	1	1	0	0	1	1	0		1	1	0	0	1	1	1	0	0	1	1
0	941	12/11/2010	0	Mongahay	18	0	1	1	13	1	1	1	1	1	1	1	1	1	1	0		0	1	0	0	1	1	0	1	1	1	1
0	942	12/11/2010	0	Mongahay	18	0	1	1	15	1	1	1	1	1	1	0	1	1	1	0		0	0			1	1	1	1	0	1	1
0	943	12/11/2010	0	Mongahay	18	0	1	0	14	1	0	0	1	1	1	0	0	1	0	0		1	0			1	1	1	1	0	0	1
0	944	12/11/2010	0	Mongahay	18	0	1	0	14	0				1	1	0	1	1	0	1	0	0	1	0	0	1	1	1	0	1	1	1
0	945	12/11/2010	0	Mongahay	18	0	1	1	12	0				1	1	0	0	0	0	0		0	0			1	1	1	1	0	0	1
0	946	12/11/2010	0	Mongahay	18	0	1	1	13	1	1	1	0	1	1	0	1	0	0	0		0	0			1	1	1	1	0	0	0
0	947	12/11/2010	0	Mongahay	18	0	1	1	14	1	1	0	1	1	1	0	1	1	0	1	1	0	1	0	0	1	1	1	0	0	0	1
0	948	12/11/2010	0	Mongahay	18	0	1	1	13	1	0	1	1	1	1	0	1	1	1	1	0	0	1	0	0	1	1	1	1	0	1	0
0	949	12/11/2010	0	Mongahay	18	0	1	0	12	0				1	1	0	1	1	0	1	0	0	1	0	0	1	1	1	0	1	1	1
0	950	12/11/2010	0	Mongahay	18	0	1	1	13	0				1	1	0	1	1	1	0		0	1	1	0	1	1	1	1	0	1	1
0	951	12/11/2010	0	Mongahay	18	0	1	0	13	1	0	0	1	1	1	0	0	1	0	0		1	0			1	1	1	1	0	1	0
0	952	12/11/2010	0	Mongahay	18	0	1	1	13	1	0	1	1	1	1	0	1	1	1	0		0	1	1	0	1	1	1	1	0	1	1
0	953	12/11/2010	0	Mongahay	18	0	1	0	13	1	1	0	1	1	1	0	0	1	1	0		0	1	1	0	1	1	1	1	0	0	1
0	954	12/11/2010	0	Mongahay	18	0	1	0	14	0				1	1	0	0	1	1	0		0	0			1	1	1	1	0	1	1
0	955	12/11/2010	0	Mongahay	18	0	1	1	13	1	1	1	1	1	1	1	0	1	1	0		1	0			1	1	1	1	0	1	1
0	956	12/11/2010	0	Mongahay	18	0	1	0	12	0				1	1	0	1	1	1	0		0	0			1	1	1	0	0	1	0
0	957	12/11/2010	0	Mongahay	18	0	1	1	12	1	0	0	0	1	1	1	0	1	0	0		1	0			1	1	1	0	1	1	1
0	958	12/11/2010	0	Mongahay	18	0	1	0	12	0				1	1	0	0	1	1	0		0	0			1	1	1	1	0	1	0
0	959	12/11/2010	0	Mongahay	18	0	1	0	15	1	0	1	1	1	1	0	1	1	1	0		0	0			1	1	0	1	0	1	0
0	960	12/11/2010	0	Mongahay	18	0	1	0	12	0				1	1	1	1	1	1	1	1	0	1	0	0	1	1	1	1	0	1	1
0	961	12/11/2010	0	Mongahay	18	0	1	1	14	0				1	1	0	1	0	0	0		0	1	1	0	1	1	1	1	0	1	1
0	962	12/11/2010	0	Mongahay	18	0	1	0	13	0				1	1	0	1	1	1	0		0	1	0	0	1	1	1	0	1	1	1
0	963	12/11/2010	0	Mongahay	18	0	1	0	17	1	1	1	1	1	1	0	1	1	1	1	1	0	1	0	0	1	1	1	1	1	1	1
0	964	12/11/2010	0	Mongahay	18	0	1	0	13	0				1	1	0	1	1	1	0		0	1	0	0	1	1	1	0	1	0	1
0	2380	19/11/2010	0	Murkuchida	19	0	1	1	14	1	1	1	0	1	1	0	1	1	1	0		0	1	0	0	1	1	1	1	0	1	1
0	2381	19/11/2010	0	Murkuchida	19	0	1	1	14	1	1	0	1	1	0	1	1	1	1	0		0	0			1	0	1	1	0	0	1
0	2382	19/11/2010	0	Murkuchida	19	0	1	1	13	0					1	1	0	1	0	0		0	1	1	0	0	0	0	0	1	1	1
0	2383	19/11/2010	0	Murkuchida	19	0	1	0	13	1	0	1	1	1	1	0	1	1	1	0		0	1	0	0	1	1	0	1	0	0	1
0	2384	19/11/2010	0	Murkuchida	19	0	1	0	16	0				1	1	0	1	0	0	0		0	1	1	0	0	0	0	0	1	0	1
0	2385	19/11/2010	0	Murkuchida	19	0	1	1	14	0				1	1	0	1	1	1	1	0	0	1	1	0	1	1	1	1	0	1	0
0	2386	19/11/2010	0	Murkuchida	19	0	1	1	14	0				1	1	0	1	1	1	0		0	0			0	1	0	1	1	1	1
0	2387	19/11/2010	0	Murkuchida	19	0	1	1	15	1	0	0	1	1	1	0	1	1	1	0		0	1	0	0	0	1	0	1	1	0	1
0	2388	19/11/2010	0	Murkuchida	19	0	1	1	14	0				1	1	0	0	1	1	0		0	1	1	0	0	1	1	1	0	1	1
0	2389	19/11/2010	0	Murkuchida	19	0	1	0	13	1	1	0	1	1	1	0	1	1	1	0		0	0			1	0	0	1	0	1	0
0	2390	19/11/2010	0	Murkuchida	19	0	1	0	14	0				1	0	1	0	1	1	1	1	0	0			1	1	0	1	0	1	1
0	2391	19/11/2010	0	Murkuchida	19	0	1	0	14	0				1	0	1	1	1	1	1	1	0	0			1	1	0	1	0	1	1
0	2392	19/11/2010	0	Murkuchida	19	0	1	1	13	1	0	1	1	1	1	0	1	1	0	0		0	0			1	1	1	1	0	1	1
0	2393	19/11/2010	0	Murkuchida	19	0	1	1	15	0				1	1	0	1	1	1	0		0	1	1	0	0	1	1	0	1	1	0
0	2394	19/11/2010	0	Murkuchida	19	0	1	1	14	0				1	1	0	1	1	1	0		0	0			0	1	0	1	1	0	1
0	2395	19/11/2010	0	Murkuchida	19	0	1	1	15	0				1	1	1	1	1	1	0		0	1	1	0	1	1	1	0	0	1	1
0	2396	19/11/2010	0	Murkuchida	19	0	1	1	14	0				1	1	1	1	1	1	0		0	1	1	0	1	1	1	1	0	0	1
0	2397	19/11/2010	0	Murkuchida	19	0	1	1	16	0				1	1	1	0	1	1	0		0	1	1	0	1	1	1	1	0	1	1
0	2398	19/11/2010	0	Murkuchida	19	0	1	1	13	0				1	1	1	1	1	1	1	0	0	0			1	1	1	1	0	1	1
0	2399	19/11/2010	0	Murkuchida	19	0	1	1	14	0				1	1	1	1	1	1	0		0	1	1	0	1	1	1	1	0	1	1
0	2400	19/11/2010	0	Murkuchida	19	0	1	1	12	0				1	1	0	1	1	1	0		0	0			1	0	0	1	1	1	1
0	2401	19/11/2010	0	Murkuchida	19	0	1	1	14	0				1	1	0	0	1	1	0		0	1	1	0	0	1	0	1	1	0	1
0	2402	19/11/2010	0	Murkuchida	19	0	1	0	15	1	0	1	1	1	1	0	1	1	1	1	0	0	0			0	1	0	1	0	0	1
0	2403	19/11/2010	0	Murkuchida	19	0	1	0	15	0				1	1	0	1	1	1	0		0	1	1	0	0	1	1	1	0	1	1
0	2404	19/11/2010	0	Murkuchida	19	0	1	0	16	1	1	1	1	1	0	1	0	1	0	0		0	1	0	0	0	0	0	1	0	1	0
0	2405	19/11/2010	0	Murkuchida	19	0	1	0	13	0				1	1	0	1	1	1	0		0	1	1	0	0	1	1	1	0	1	1
0	2406	19/11/2010	0	Murkuchida	19	0	1	0	14	0				1	1	0	1	1	1	0		0	1	1	0	1	1	1	1	1	1	1
0	2407	19/11/2010	0	Murkuchida	19	0	1	1	15	1	0	1	1	1	0	1	1	1	1	0		0	1	0	0	1	1	1	1	0	1	1
0	2408	19/11/2010	0	Murkuchida	19	0	1	1	13	0				1	1	0	0	1	0	0		0	1	0	0	0	0	0	1	0	1	0
0	2409	19/11/2010	0	Murkuchida	19	0	1	1	14	0				0									0			0	1	0	1	0	1	1
0	2410	19/11/2010	0	Murkuchida	19	0	1	1	13	0				1	1	0	1	0	1	0		0	0			0	1	0	1	0	0	1
0	2411	19/11/2010	0	Murkuchida	19	0	1	1	15	1	0	1	1	1	1	0	1	1	0	0		0	1	0	0	1	1	1	1	1	1	1
0	2412	19/11/2010	0	Murkuchida	19	0	1	1	15	0				1	1	0	0	1	1	0		0	1	1	0	0	1	1	1	0	1	1
0	2413	19/11/2010	0	Murkuchida	19	0	1	1	13	0				1	1	0	1	1	1	0		0	0			1	1	0	1	0	0	1
0	2414	19/11/2010	0	Murkuchida	19	0	1	1	15	0				1	1	0	1	1	1	1	1	0	0			1	1	1	1	1	0	1
0	2415	19/11/2010	0	Murkuchida	19	0	1	1	15	0				1	1	0	1	1	1	0		0	1	1	0	1	1	0	1	0	0	1
0	2416	19/11/2010	0	Murkuchida	19	0	1	1	15	1	0	1	1	1	1	0	1	1	1	0		0	0			0	1	0	1	0	0	1
0	2417	19/11/2010	0	Murkuchida	19	0	1	1	15	0				1	1	0	1	0	1	1	1	0	1	0	0	1	1	1	1	0	0	1
0	2418	19/11/2010	0	Murkuchida	19	0	1	1	15	0				1	1	0	0	1	0	0		0	0			0	0	0	0	0	0	0
0	2419	19/11/2010	0	Murkuchida	19	0	1	1	15	0				1	1	1	1	1	1	0		0	0			0	1	0	1	0	1	0
0	2420	19/11/2010	0	Murkuchida	19	0	1	1	14	0				1	1	0	1	1	1	0		0	1	1	0	1	1	0	1	0	1	0
0	2421	19/11/2010	0	Murkuchida	19	0	1	1	15	1	1	1	1	1	1	1	0	1	1	0		0	0			0	1	0	1	1	1	1
0	1006	4/11/2010	0	Muslur	20	1	1	1	15	1	0	0	1	1	1	0	0	1	1	0		0	1	0	0	1	1	1	1	0	1	0
0	1007	4/11/2010	0	Muslur	20	1	1	0	15	1	1	1	1	1	0	1	1	0	0	1	0	0	0			1	1	1	0	0	0	1
0	1008	4/11/2010	0	Muslur	20	1	1	1	13	1	1	0	0	1	1	0	1	1	1	0		1	1	1	0	1	1	1	0	0	1	1
0	1009	4/11/2010	0	Muslur	20	1	1	1	13	0				1	1	0	1	1	0	0		0	0			1	1	1	0	0	0	0
0	1010	4/11/2010	0	Muslur	20	1	1	1	14	0				1	1	0	1	1	1	0		0	1	0	0	1	1	1	0	0	1	0
0	1011	4/11/2010	0	Muslur	20	1	1	0	15	1	1	1	1	1	1	1	1	1	1	0		0	1	1	0	1	1	1	1	0	1	1
0	1012	4/11/2010	0	Muslur	20	1	1	0	15	1	0	1	1	1	1	1	0	1	1	1	0	0	1	0	0	1	1	1	0	0	1	1
0	1013	4/11/2010	0	Muslur	20	1	1	1	14	1	0	1	0	1	1	0	0	1	1	0		0	1	1	0	1	1	1	1	1	1	1
0	1014	4/11/2010	0	Muslur	20	1	1	1	13	0				1	0	1	1	1	1	0		0	1	1	0	1	1	0	0	0	1	1
0	1015	4/11/2010	0	Muslur	20	1	1	1	14	1	1	1	1	1	1	0	1	1	1	0		0	0			1	1	1	0	0	0	1
0	1016	4/11/2010	0	Muslur	20	1	1	1	15	0				1	1	0	1	0	1	0		1	1	0	0	1	1	1	0	0	1	0
0	1017	4/11/2010	0	Muslur	20	1	1	0	16	1	1	0	1	1	1	0	1	1	1	0		0	1	1	0	1	1	1	1	0	0	1
0	1018	4/11/2010	0	Muslur	20	1	1	1	15	1	0	1	1	1	1	1	1	1	1	0		0	1	0	0	1	1	1	1	0	1	1
0	1019	4/11/2010	0	Muslur	20	1	1	1	15	1	0	1	0	1	1	0	0	1	0	0		0	1	1	0	1	1	1	1	0	1	1
0	1020	4/11/2010	0	Muslur	20	1	1	1	14	1	1	1	1	1	1	0	1	1	1	0		0	1	0	0	1	1	0	1	0	1	1
0	1021	4/11/2010	0	Muslur	20	1	1	1	14	1	0	1	1	1	1	0	0	1	0	0		0	1	1	0	1	1	1	0	0	1	1
0	1022	4/11/2010	0	Muslur	20	1	1	1	14	1	1	1	1	1	1	0	1	1	1	0		0	1	1	0	1	1	1	1	0	1	1
0	1023	4/11/2010	0	Muslur	20	1	1	0	15	0				0									1	0	0	1	1	1	0	1	0	0
0	1024	4/11/2010	0	Muslur	20	1	1	0	15	1	1	1	0	1	1	0	0	1	1	0		1	1	0	0	0	1	1	0	0	1	1
0	1025	4/11/2010	0	Muslur	20	1	1	1	13	1	0	0	1	1	1	0	1	1	1	0		0	1	1	0	1	1	1	0	1	0	1
0	1026	4/11/2010	0	Muslur	20	1	1	0	14	1	1	0	1	1	1	0	1	1	1	0		0	0	1	0	1	1	1	0	0	1	1
0	1027	4/11/2010	0	Muslur	20	1	1	1	14	1	0	1	1	1	1	0	0	1	1	0		0	1	1	0	1	1	1	1	0	1	1
0	1028	4/11/2010	0	Muslur	20	1	1	1	13	0				1	0	1	1	1	1	0		0	1	1	0	1	1	1	1	0	0	1
0	1029	4/11/2010	0	Muslur	20	1	1	1	12	1	0	1	1	1	1	0	0	1	1	0		0	1	1	0	0	1	0	1	0	1	1
0	1030	4/11/2010	0	Muslur	20	1	1	1	14	1	0	0	1	1	1	0	1	1	1	0		0	1	0	0	1	1	1	1	0	1	1
0	1031	4/11/2010	0	Muslur	20	1	1	0	13	1	1	1	0	1	1	0	1	1	1	1	1	0	1	0	0	1	1	1	0	1	1	1
0	1032	4/11/2010	0	Muslur	20	1	1	1	14	1	0	0	1	1	1	0	1	1	1	0		0	1	0	0	1	0	0	0	1	1	1
0	1033	4/11/2010	0	Muslur	20	1	1	1	14	1	0	1	1	1	0	1	0	1	1	0		0	1	1	0	1	1	0	1	0	1	0
0	1034	4/11/2010	0	Muslur	20	1	1	1	15	1	1	1	1	1	1	0	1	1	0	0		0	1	1	0	1	1	1	0	0	0	1
0	1035	4/11/2010	0	Muslur	20	1	1	0	15	1	1	1	1	1	1	0	1	1	1	0		0	0			1	1	1	1	1	1	1
0	1036	4/11/2010	0	Muslur	20	1	1	0	14	1	0	1	1	1	1	0	1	1	1	0		0	1	0	0	1	1	1	1	1	1	1
0	1037	4/11/2010	0	Muslur	20	1	1	1	13	1	0	1	1	1	1	0	1	1	1	0		0	0			1	0	1	0	0	1	0
0	1038	4/11/2010	0	Muslur	20	1	1	1	15	0				1	1	0	1	0	1	0		0	1	1	0	1	0	0	0	0	0	1
0	1039	4/11/2010	0	Muslur	20	1	1	1	15	0				1	1	0	0	1	0	0		0	0			1	1	1	0	0	1	1
0	1040	4/11/2010	0	Muslur	20	1	1	1	13	1	0	1	1	1	1	0	1	1	0	0		1	1	1	0	1	1	1	1	0	1	1
0	1041	4/11/2010	0	Muslur	20	1	1	1	15	1	0	0	1	1	1	0	1	1	0	0		0	0			1	1	1	0	0	0	1
0	1042	4/11/2010	0	Muslur	20	1	1	0	15	1	1	0	1	1	1	0	0	0	1	0		1	1	1	0	1	1	1	0	0	0	0
0	1043	4/11/2010	0	Muslur	20	1	1	1	13	1	0	1	1	1	1	0	0	1	0	1	0	0	1	1	0	1	1	0	1	0	1	1
0	1044	4/11/2010	0	Muslur	20	1	1	0	14	1	0	0	0	0									1	0	0	1	1	0	0	0	1	1
0	1045	4/11/2010	0	Muslur	20	1	1	0	13	1	1	1	1	1	1	1	1	1	1	1	0	0	1	1	0	1	1	1	0	1	1	1
0	1046	4/11/2010	0	Muslur	20	1	1	0	15	1	0	0	1	1	1	0	0	1	1	0		0	0			0	1	1	1	0	0	0
0	1047	4/11/2010	0	Muslur	20	1	1	0	14	1	0	1	1	1	1	0	1	1	1	0		0	1	1	0	1	1	1	1	0	1	1
0	1048	4/11/2010	0	Muslur	20	1	1	1	13	1	0	1	1	1	1	0	1	1	1	0		0	1	1	0	1	1	0	1	0	0	1
0	1049	4/11/2010	0	Muslur	20	1	1	0	15	1	1	1	1	1	1	0	1	1	1	0		0	1	1	0	1	0	1	1	0	1	1
0	50	9/11/2010	0	Nahasey	21	1	1	0	13	1	0	1	1	1	1	0	0	1	1	1	1	0	1	1	0	1	1	1	0	1	1	1
0	51	9/11/2010	0	Nahasey	21	1	1	1	12	1	0	0	1	1	0	1	1	1	1	0		0	0			1	1	0	0	1	1	1
0	52	9/11/2010	0	Nahasey	21	1	1	1	15	1	0	1	1	1	1	1	1	0	0	0		0	0			1	1	1	0	0	0	1
0	53	9/11/2010	0	Nahasey	21	1	1	1	13	1	1	0	1	1	1	0	0	0	0	0		0	0			1	1	1	0	1	0	1
0	54	9/11/2010	0	Nahasey	21	1	1	1	13	1	1	1	1	1	0	1	1	0	1	0		0	0			1	1	1	0	1	1	1
0	55	9/11/2010	0	Nahasey	21	1	1	0	13	0				1	0	0	0	0	0	1	0	0	0			1	1	1	1	1	1	0
0	56	9/11/2010	0	Nahasey	21	1	1	1	14	1	0	0	1	1	1	0	1	0	1	0		0	0			1	1	1	0	1	1	1
0	57	9/11/2010	0	Nahasey	21	1	1	0	14	0				1	1	0	1	1	0	0		0	0			1	1	1	1	1	1	0
0	58	9/11/2010	0	Nahasey	21	1	1	1	13	0				1	1	0	1	0	0	1	1	0	1	1	0	1	1	1	0	0	0	0
0	59	9/11/2010	0	Nahasey	21	1	1	0	13	1	1	1	1	0									0			1	0	0	0	1	1	1
0	60	9/11/2010	0	Nahasey	21	1	1	1	14	0				1	1	0	1	1	0	1	0	1	0			1	1	1	0	0	1	0
0	61	9/11/2010	0	Nahasey	21	1	1	1	13	0				1	1	0	1	1	1	0		0	0			1	1	1	1	0	0	1
0	62	9/11/2010	0	Nahasey	21	1	1	1	15	0				1	1	0	1	1	0	0		0	0			1	1	1	0	0	1	0
0	63	9/11/2010	0	Nahasey	21	1	1	1	12	0				1	1	0	1	1	0	1	1	0	0			1	1	0	1	1	1	0
0	64	9/11/2010	0	Nahasey	21	1	1	1	13	0				1	1	0	1	1	1	0		0	0			1	1	1	1	1	1	0
0	65	9/11/2010	0	Nahasey	21	1	1	1	13	0				1	1	0	0	1	1	1	0	0	1	0	0	1	1	1	1	1	1	1
0	66	9/11/2010	0	Nahasey	21	1	1	1	14	1	0	0	1	1	1	0	1	1	0	1	0	0	0			1	1	0	1	1	1	1
0	67	9/11/2010	0	Nahasey	21	1	1	1	13	0				1	1	0	0	1	1	1	0	0	1	1	0	1	1	1	1	1	1	0
0	68	9/11/2010	0	Nahasey	21	1	1	1	13	0				1	1	0	0	1	1	1	1	0	1	1	0	1	1	1	0	1	0	1
0	69	9/11/2010	0	Nahasey	21	1	1	0	16	0				1	1	0	1	1	1	0		0	0			1	1	1	1	1	1	0
0	70	9/11/2010	0	Nahasey	21	1	1	0	13	0				1	1	0	1	0	1	0		0	0			1	1	1	0	1	1	0
0	71	9/11/2010	0	Nahasey	21	1	1	1	14	0				1	1	0	0	1	1	1	1	1	1	0	0	1	1	1	1	0	1	1
0	72	9/11/2010	0	Nahasey	21	1	1	1	12	0				1	1	0	1	1	1	0		0	0			1	1	0	1	1	1	1
0	73	9/11/2010	0	Nahasey	21	1	1	1	14	0				1	1	0	0	1	0	0		0	1	1	0	1	0	1	1	0	1	0
0	74	9/11/2010	0	Nahasey	21	1	1	1	13	0				1	1	0	1	1	0	0		0	0			1	1	0	1	0	1	0
0	75	9/11/2010	0	Nahasey	21	1	1	1	12	0				1	1	0	1	1	1	0		0	0			1	1	0	0	0	0	1
0	76	9/11/2010	0	Nahasey	21	1	1	1	14	0				1	0	1	0	0	1	0		0	1	1	0	1	1	1	1	1	1	1
0	77	9/11/2010	0	Nahasey	21	1	1	1	12	1	0	0	1	1	1	0	0	1	0	1	0	1	0			0	1	0	0	1	1	1
0	78	9/11/2010	0	Nahasey	21	1	1	0	14	1	0	1	1	1	1	0	1	1	1	1	0	0	0			1	1	0	1	1	0	1
0	79	9/11/2010	0	Nahasey	21	1	1	0	14	0				1	0	0	0	1	1	0		0	1	1	0	0	1	0	0	1	1	1
0	80	9/11/2010	0	Nahasey	21	1	1	1	13	0				1	1	0	0	1	1	0		0	1	0	0	1	1	1	0	0	1	1
0	81	9/11/2010	0	Nahasey	21	1	1	0	14	0				1	1	0	1	1	1	0		0	0			1	1	1	1	1	1	0
0	82	9/11/2010	0	Nahasey	21	1	1	1	13	0				1	1	0	1	1	1	0		0	0			1	1	0	0	0	0	1
0	83	9/11/2010	0	Nahasey	21	1	1	1	15	0				1	1	0	0	1	1	0		0	1	1	0	1	1	1	1	1	1	1
0	84	9/11/2010	0	Nahasey	21	1	1	1	13	0				1	1	0	1	0	1	0		0	0			1	1	1	1	1	0	0
0	85	9/11/2010	0	Nahasey	21	1	1	1	13	0				1	1	0	0	1	1	0		0	0			0	1	0	0	1	0	1
0	86	9/11/2010	0	Nahasey	21	1	1	1	13	0				1	1	0	1	0	1	0		0	0			1	1	0	0	0	0	1
0	87	9/11/2010	0	Nahasey	21	1	1	1	14	0				1	1	0	1	0	1	0		0	0			1	1	0	0	0	0	0
0	88	9/11/2010	0	Nahasey	21	1	1	1	12	0				1	1	1	0	1	0	1	0	0	1	1	0	1	1	0	1	1	1	0
0	89	9/11/2010	0	Nahasey	21	1	1	1	13	0				1	1	0	1	0	1	1	1	0	0			1	1	1	0	0	0	0
0	90	9/11/2010	0	Nahasey	21	1	1	1	15	0				1	1	0	1	1	1	0		1	0			1	1	1	0	0	1	0
0	91	9/11/2010	0	Nahasey	21	1	1	1	12	0				1	1	0	0	0	1	0		0	0			1	1	0	1	0	0	0
0	92	9/11/2010	0	Nahasey	21	1	1	1	14	0				1	1	0	0	0	1	1	0	0	1	0	0	1	1	1	1	0	1	0
0	227	5/11/2010	0	Qaliyeda	22	1	1	0	14	1	1	0	1	1	1	1	1	1	1	0		1	1	0	0	1	1	1	1	0	1	1
0	228	5/11/2010	0	Qaliyeda	22	1	1	1	13	1	1	1	1	1	1	0	1	1	1	1	1	0	1		0	1	1	1	0	0	0	0
0	229	5/11/2010	0	Qaliyeda	22	1	1	1	13	1	1	1	1	1	1	0	1	0	0	0			1	0	0	1	1	0	0	0	0	1
0	230	5/11/2010	0	Qaliyeda	22	1	1	1	13	0				1	1	0	0	0	1	0		1	1	0	0	1	1	0	0		0	1
0	231	5/11/2010	0	Qaliyeda	22	1	1	1	13	1	0	0	1	1	1	0	0	1	0	0		0	0			0	1	1	0	0	1	0
0	232	5/11/2010	0	Qaliyeda	22	1	1	0	14	1	0	1	1	1	1	0	0	1	0	0		0	1	0	0	1	1	1	0	0	0	1
0	233	5/11/2010	0	Qaliyeda	22	1	1	1	15	1	0	0	1	1	1	0	1	1	1	0		0	1	1	0	1	1	0	0	0	1	1
0	234	5/11/2010	0	Qaliyeda	22	1	1	0	16	1	0	0	1	0									0			0	0	0				1
0	235	5/11/2010	0	Qaliyeda	22	1	1	1	13	1	0	1	0	0									0			1	1	1	0	0		0
0	236	5/11/2010	0	Qaliyeda	22	1	1	1	13	1	0		0	0									0				0	0	0	0	0
0	237	5/11/2010	0	Qaliyeda	22	1	1	1	15	1	1	1	1	1	1	0	0	1	0	0		0	1	1	0	1	1	1	0	0	1	1
0	238	5/11/2010	0	Qaliyeda	22	1	1	0	15	0				0									0			1	1	1	0	1		0
0	239	5/11/2010	0	Qaliyeda	22	1	1	0	14	1	0	1	0	1	1	0	0	1	1	1	0	0	1	1	0	1	1	1	0	1	1	1
0	240	5/11/2010	0	Qaliyeda	22	1	1	0	15	0				1			1	1	1	0		1	1	0	0	1	1	0	0	1	1	1
0	241	5/11/2010	0	Qaliyeda	22	1	1	1	14	1	0	0	0	1	1	0	0	1	1	1	0	1	1	1	0	1	1	1	0	0	0	1
0	242	5/11/2010	0	Qaliyeda	22	1	1	1	12	1	0	1	0	1	1	0	0	1	1	0		0	1	1	0	1	1	0	0	0	0	0
0	243	5/11/2010	0	Qaliyeda	22	1	1	1	14	0				1	1	0	1	1	1	0		0	0			1	1	1	0	0	0	0
0	244	5/11/2010	0	Qaliyeda	22	1	1	1	14	1	1	1	1	1	1	0	1	1	0	1	0	0	0			1	1	1	0	0	1	1
0	245	5/11/2010	0	Qaliyeda	22	1	1	1	13	1	1	1	1	1	1	0	1	1	1	1	0	0	0			1	1	1	1	0	1	1
0	246	5/11/2010	0	Qaliyeda	22	1	1	0	14	1	1	1	1	1	1	1	1	1	1	1	0	0	1	0	0	1	1	0	1	0	0	1
0	247	5/11/2010	0	Qaliyeda	22	1	1	1	13	1	1	1	0	1	1	0	1	1	1	0		0	0			1	1	1				1
0	96	16/11/2010	0	Qambasirong	23	1	1	1	16	1	1	0	1	1	1	1	1	0	1	1	1	0	1	1	0	0	1	0	0	1	1	1
0	97	16/11/2010	0	Qambasirong	23	1	1	0	12	0				1	1	0	0	1	1	0		0	1	1	0	0	1	0	1	1	1	0
0	98	16/11/2010	0	Qambasirong	23	1	1	1	16	1	1	0	1	1	1	1	1	1	1	1	0	0	1	1	0	0	0	0	1	1	1	1
0	99	16/11/2010	0	Qambasirong	23	1	1	0	13	0				1	1	0	1	1	1	0		0	1	1	0	0	0	0	1	0	1	0
0	100	16/11/2010	0	Qambasirong	23	1	1	0	19	1	0	0	1	1	1	1	1	1	1	1	0	0	1	0	0	1	1	1	1	1	1	1
0	101	16/11/2010	0	Qambasirong	23	1	1	0	14	0				1	0	1	1	1	0	1	1	1	1	1	0	1	1	1	1	1	0	1
0	102	16/11/2010	0	Qambasirong	23	1	1	0	16	0				1	1	0	1	1	1	0		0	1	1	0	1	1	1	1	1	0	1
0	103	16/11/2010	0	Qambasirong	23	1	1	1	14	0				1	1	0	1	1	1	0		0	1	1	0	1	1	1	1	1	0	1
0	104	16/11/2010	0	Qambasirong	23	1	1	1	15	1	0	1	1	1	1	1	1	1	1	0		0	1	1	0	1	1	1	1	0	1	1
0	105	16/11/2010	0	Qambasirong	23	1	1	1	16	0				1	1	0	1	1	1	1	0	0	1	1	0	1	1	1	1	1	0	1
0	106	16/11/2010	0	Qambasirong	23	1	1	1	17	0				1	1	0	1	1	1	1	1	0	1	1	0	1	1	1	1	1	0	1
0	107	16/11/2010	0	Qambasirong	23	1	1	1	16	0				1	1	0	0	1	0	0		0	1	1	0	1	1	0	1	1	1	1
0	108	16/11/2010	0	Qambasirong	23	1	1	0	13	1	1	1	1	1	1	1	1	1	1	0		0	1	1	0	1	1	1	1	1	1	1
0	109	16/11/2010	0	Qambasirong	23	1	1	1	15	1	0	1	1	1	1	1	1	1	1	0		0	1	1	0	1	1	1	1	0	1	1
0	110	16/11/2010	0	Qambasirong	23	1	1	0	13	0				1	1	0	0	0	1	1	0	0	1	0	0	0	0	0	1	1	1	1
0	111	16/11/2010	0	Qambasirong	23	1	1	0	15	1	1	1	1	1	1	1	1	1	1	0		0	1	1	0	1	1	0	1	1	1	1
0	112	16/11/2010	0	Qambasirong	23	1	1	1	13	0				1	1	0	1	0	1	0		0	1	0	0	0	1	0	0	0	0	1
0	113	16/11/2010	0	Qambasirong	23	1	1	1	12	1	0	0	1	1	1	0	1	1	1	0		0	1	0	0	1	1	1	1	1	1	1
0	114	16/11/2010	0	Qambasirong	23	1	1	1	14	0				1	1	0	1	1	1	0		0	1	0	0	1	1	1	0	0	0	1
0	115	16/11/2010	0	Qambasirong	23	1	1	1	13	1	1	1	1	1	1	0	1	1	1	0		0	1	1	0	0	0	0	1	1	1	1
0	116	16/11/2010	0	Qambasirong	23	1	1	1	12	1	1	1	1	1	1	0	0	1	1	0		0	1	0	0	1	1	0	1	0	1	1
0	117	16/11/2010	0	Qambasirong	23	1	1	1	16	0				1	1	1	1	1	1	0		0	1	1	0	1	1	1	1	0	1	1
0	118	16/11/2010	0	Qambasirong	23	1	1	1	13	0				1	1	1	0	0	0	0		0	1	1	0	1	1	1	0	0	1	1
0	119	16/11/2010	0	Qambasirong	23	1	1	1	12	1	0	1	1	1	1	1	1	0	1	0		0	1	1	0	1	1	1	1	1	1	1
0	120	16/11/2010	0	Qambasirong	23	1	1	0	14	1	0	1	1	1	1	0	1	1	1	0		0	1	1	0	1	1	1	1	0	1	1
0	121	16/11/2010	0	Qambasirong	23	1	1	0	16	1	0	1	1	1	1	1	1	1	0	0		1	1	1	0	1	1	1	1	1	1	1
0	122	16/11/2010	0	Qambasirong	23	1	1	0	15	1	1	1	1	1	1	1	0	0	1	1	0	0	1	1	0	1	1	1	0	1	1	0
0	123	16/11/2010	0	Qambasirong	23	1	1	0	16	1	1	0	1	1	1	0	0	1	0	1	0	0	1	0	0	1	1	0	0	0	0	1
0	124	16/11/2010	0	Qambasirong	23	1	1	0	13	1	0	0	0	1	0	1	0	0	1	0		0	1	0	0	1	0	0	0	0	0	1
0	125	16/11/2010	0	Qambasirong	23	1	1	1	14	1	0	1	1	1	0	1	1	1	1	0		0	1	0	0	1	1	1	0	0	1	0
0	126	16/11/2010	0	Qambasirong	23	1	1	1	14	0				1	1	0	1	1	1	0		0	1	1	0	1	1	1	1	0	1	1
0	127	16/11/2010	0	Qambasirong	23	1	1	0	16	1	1	0	1	1	1	0	1	1	0	0		0	1	1	0	1	1	0	0	0	1	1
0	128	16/11/2010	0	Qambasirong	23	1	1	0	14	1	1	0	1	1	1	0	1	1	0	0		0	0			1	1	1	1	0	0	1
0	129	16/11/2010	0	Qambasirong	23	1	1	0	17	1	0	1	1	1	1	1	1	1	1	0		0	1	1	0	1	1	1	1	1	1	1
0	130	16/11/2010	0	Qambasirong	23	1	1	1	14	1	0	0	1	1	1	0	1	1	1	0		0	1	1	0	1	1	1	1	1	1	0
0	131	16/11/2010	0	Qambasirong	23	1	1	1	14	1	0	0	1	1	1	1	1	1	1	0		0	1	1	0	1	1	1	1	1	1	1
0	132	16/11/2010	0	Qambasirong	23	1	1	1	15	0				1	1	0	1	1	1	0		0	1	1	0	1	1	1	1	1	1	0
0	133	16/11/2010	0	Qambasirong	23	1	1	1	16	0				1	0	1	1	1	1	0		0	1	1	0	1	1	1	1	1	1	1
0	134	16/11/2010	0	Qambasirong	23	1	1	0	16	0				1	0	1	1	1	1	0		0	1	1	0	1	1	1	1	1	1	1
0	135	16/11/2010	0	Qambasirong	23	1	1	0	18	0				1	0	1	0	1	0	0		0	1	1	0	1	1	1	1	0	0	1
0	136	16/11/2010	0	Qambasirong	23	1	1	1	13	1	0	1	0	1	1	0	1	1	0	0		0	1	0	0	1	1	0	0	0	0	1
0	137	16/11/2010	0	Qambasirong	23	1	1	1	13	1	0	1	1	1	1	1	1	0	1	0		0	1	1	0	1	1	1	0	1	1	1
0	138	16/11/2010	0	Qambasirong	23	1	1	1	14	1	0	1	1	1	1	1	1	0	1	0		0	1	0	0	1	1	1	0	0	1	1
0	139	16/11/2010	0	Qambasirong	23	1	1	1	13	1	0	1	1	1	0	1	0	1	0	1	0	0	1	1	0	1	1	1	0	0	1	1
0	206	10/11/2010	0	Qwam	24	1	1	0	13	1	1	0	1	1	1	0	1	1	1	0		0	1	1	0	1	1	1	0	0	1	1
0	207	10/11/2010	0	Qwam	24	1	1	1	14	1	0	1	1	1	1	0	1	1	1	0		0	1	1	0	1	1	0	1	1	1	1
0	208	10/11/2010	0	Qwam	24	1	1	1	13	0				1	1	0	1	1	1	0		0	0			1	1	0	1	0	1	0
0	209	10/11/2010	0	Qwam	24	1	1	1	15	0				1	1	0	1	1	0	0		0	0			1	1	0	0	1	1	1
0	210	10/11/2010	0	Qwam	24	1	1	1	13	0				1	1	0	1	1	1	0		0	1	1	0	1	1	1	1	0	1	0
0	211	10/11/2010	0	Qwam	24	1	1	0	14	0				1	0	1		1	1	0		0	0			1	1	1	1	1	1	1
0	212	10/11/2010	0	Qwam	24	1	1	1	13	0				1	1	0	1	1	1	0		0	1	1	0	1	1	1	0	0	0	0
0	213	10/11/2010	0	Qwam	24	1	1	0	16	1	0	0	1	1	1	0	0	1	1	1	0	0	1	1	0	1	1	1	1	0	0	1
0	214	10/11/2010	0	Qwam	24	1	1	1	12	0				1	1	0	1	1	1	0		0	0			1	1	1	1	0	0	1
0	215	10/11/2010	0	Qwam	24	1	1	1	13	0				1	1	0	0	1	1	0		0	0			1	1	0	1	1	0	0
0	216	10/11/2010	0	Qwam	24	1	1	1	12	0				1	1	0	1	1	1	0		0	0			0	1	1	1	1	1	1
0	217	10/11/2010	0	Qwam	24	1	1	0	15	0				0									1	1	0	1	1	1	0	0	1	1
0	218	10/11/2010	0	Qwam	24	1	1	0	19	0				1	1	0	1	1	1	0		0	1	1	0	1	1	1	1	1	1	0
0	219	10/11/2010	0	Qwam	24	1	1	0	14	0				1	1	0	1	1	1	0		0	1	1	0	1	1	1	1	1	1	1
0	220	10/11/2010	0	Qwam	24	1	1	1	14	0				1	1	0	1	1	1	0		0	0			1	0	0	1	0	1	1
0	221	10/11/2010	0	Qwam	24	1	1	1	14	0				1	1	0	1	1	1	0		0	0			1	1	1	1	0	1	1
0	222	10/11/2010	0	Qwam	24	1	1	0	15	0				1	1	0	1	0	1	0		0	0			1	1	1	1	1	1	1
0	223	10/11/2010	0	Qwam	24	1	1	1	13	0				1	1	0	1	1	1	0		0	1	1	0	1	1	1	1	1	1	0
0	224	10/11/2010	0	Qwam	24	1	1	1	15	0				1	1	0	1	1	0	0		0	0			1	1	1	1	0	1	1
0	225	10/11/2010	0	Qwam	24	1	1	1	14	0				1	1	0	1	0	1	1	1	0	1	1	0	1	0	1	1	0	1	1
0	565	15/11/2010	0	Sagha	25	0	1	0	13	0				1	1	0	1	0	1	1	1	0	0			0	1	0	1	0	0	1
0	566	15/11/2010	0	Sagha	25	0	1	0	14	1	1	0	1	1	1	0	1	0	1	0		0	1	0	0	1	0	0	0	0	1	0
0	567	15/11/2010	0	Sagha	25	0	1	0	14	1	1	1	1	1	0	1	1	0	1	1	0	0	1	0	0	1	0	0	0	0	0	0
0	568	15/11/2010	0	Sagha	25	0	1	1	14	0				1	0	1	0	0	1	0		0	1	1	0	1	1	1	1	1	1	1
0	569	15/11/2010	0	Sagha	25	0	1	0	15	1	1	0	1	1	0	1	1	1	1	0		0	1	1	0	0	0	0	1	1	1	1
0	570	15/11/2010	0	Sagha	25	0	1	1	14	0				1	0	1	0	1	1	1	1	0	1	1	0	1	1	0	1	0	1	1
0	571	15/11/2010	0	Sagha	25	0	1	0	13	1	1	0	1	1	0	1	0	0	0	0		0	1	0	0	1	0	0	1	0	0	1
0	572	15/11/2010	0	Sagha	25	0	1	1	12	0				1	0	1	0	0	1	0		0	1	1	0	0	1	0	1	0	1	1
0	573	15/11/2010	0	Sagha	25	0	1	0	13	0				1	1	0	1	1	1	0		1	1	1	0	0	1	0	1	0	1	0
0	574	15/11/2010	0	Sagha	25	0	1	1	13	1	0	1	1	1	1	0	1	1	1	0		0	1	1	0	1	0	0	1	0	1	1
0	575	15/11/2010	0	Sagha	25	0	1	1	16	1	0	0	1	1	1	1	1	1	1	0		1	1	1	0	1	1	0	1	0	1	1
0	576	15/11/2010	0	Sagha	25	0	1	1	14	1	1	1	1	1	0	1	1	0	0	0		0	1	0	0	1	0	0	1	0	0	1
0	577	15/11/2010	0	Sagha	25	0	1	1	14	1	1	1	1	1	1	1	1	0	0	0		0	1	0	0	1	1	1	1	0	0	0
0	578	15/11/2010	0	Sagha	25	0	1	1	14	0				1	0	1	1	1	1	0		1	1	1	0	1	0	0	1	1	1	1
0	579	15/11/2010	0	Sagha	25	0	1	1	12	0				1	1	0	0	1	0	0		0	0			0	1	0	1	0	0	1
0	580	15/11/2010	0	Sagha	25	0	1	1	14	0				1	0	1	1	1	1	0		1	1	1	0	0	0	1	0	0	0	1
0	581	15/11/2010	0	Sagha	25	0	1	1	13	0				1	1	0	0	0	1	0		0	0			0	1	0	1	0	0	0
0	582	15/11/2010	0	Sagha	25	0	1	1	16	1	0	1	1	1	0	1	1	0	0	0		0	1	1	0	0	0	0	1	0	1	1
0	583	15/11/2010	0	Sagha	25	0	1	1	13	0				1	1	0	1	0	0	1	0	0	0			1	1	1	1	0	0	0
0	584	15/11/2010	0	Sagha	25	0	1	1	12	1	1	1	1	1	1	0	1	0	0	0		0	0			1	1	1	1	0	0	1
0	585	15/11/2010	0	Sagha	25	0	1	1	13	0				1	1	0	1	0	0	0		0	0			0	0	0	1	0	0	1
0	587	15/11/2010	0	Sagha	25	0	1	1	13	1	1	0	1	1	0	1	1	0	1	0		0	1	0	0	0	0	0	1	0	1	1
0	588	15/11/2010	0	Sagha	25	0	1	1	12	1	0	0	1	1	0	1	1	1	1	0		0	1	1	0	0	0	0	1	1	1	1
0	589	15/11/2010	0	Sagha	25	0	1	1	13	0				1	1	0	0	1	1	0		0	1	1	0	0	0	0	0	1	1	1
0	590	15/11/2010	0	Sagha	25	0	1	1	13	0				1	0	1	1	1	1	0		0	1	1	0	0	1	0	1	0	1	1
0	591	15/11/2010	0	Sagha	25	0	1	1	14	1	1	1	1	1	0	1	1	0	0	0		0	1	0	0	1	1	0	1	0	0	1
0	592	15/11/2010	0	Sagha	25	0	1	1	15	0				1	1	0	1	1	1	0		0	1	1	0	0	0	0	0	1	1	1
0	627	18/11/2010	0	Semonyandi	26	1	1	1	13	1	0	1	1	0	1	1	0	1	0	0		0	1	1	0	0	1	0	1	0	1	1
0	628	18/11/2010	0	Semonyandi	26	1	1	1	14	0				1	1	0	1	1	0	0		0	1	0	0	1	1	1	1	0	1	0
0	629	18/11/2010	0	Semonyandi	26	1	1	1	14	1	1	0	1	1	1	1	1	1	0	0		0	1	1	0	0	0	0	1	0	1	1
0	630	18/11/2010	0	Semonyandi	26	1	1	1	15	0				1	1	1	1	1	1	0		0	1	1	0	1	1	1	1	1	1	0
0	631	18/11/2010	0	Semonyandi	26	1	1	0	15	1	0	1	1	1	1	1	1	0	1	1	0	0	1	1	0	1	1	1	1	0	0	1
0	632	18/11/2010	0	Semonyandi	26	1	1	1	14	0				1	1	0	1	1	1	0		0	0			1	0	1	1	1	1	1
0	639	18/11/2010	0	Semonyandi	26	1	1	1	14	1	0	1	1	1	1	1	1	1	1	0		0	1	1	0	1	0	0	1	1	1	1
0	640	18/11/2010	0	Semonyandi	26	1	1	0	16	1	0	0	1	1	0	1	0	1	1	1	0	0	1	1	0	1	1	1	1	1	1	1
0	641	18/11/2010	0	Semonyandi	26	1	1	0	14	1	0	0	1	1	1	1	0	1	1	0		0	1	1	0	0	1	1	1	1	1	1
0	642	18/11/2010	0	Semonyandi	26	1	1	0	13	1	0	0	0	1	0	1	1	0	1	0		0	0			0	0	0	1	1	1	1
0	643	18/11/2010	0	Semonyandi	26	1	1	0	14	1	0	1	1	1	0	1	1	1	1	0		0	1	0	0	1	1	1	0	1	0	1
0	644	18/11/2010	0	Semonyandi	26	1	1	1	13	1	0	1	1	1	0	0	1	0	1	0		0	1	1	0	0	1	1	1	1	1	0
0	645	18/11/2010	0	Semonyandi	26	1	1	1	15	0				1	0	1	1	0	1	0		0	1	1	0	0	1	1	1	1	1	0
0	646	18/11/2010	0	Semonyandi	26	1	1	0	16	1	0	1	1	1	0	0	0	1	1	0		0	1	1	0	1	1	0	1	1	1	1
0	647	18/11/2010	0	Semonyandi	26	1	1	0	13	1	1	1	1	1	0	1	1	1	1	0		0	1	1	0	1	0	1	1	1	1	0
0	648	18/11/2010	0	Semonyandi	26	1	1	1	13	1	0	1	1	1	1	1	1	0	0	1	1	0	1	0	0	0	1	0	1	1	1	0
0	649	18/11/2010	0	Semonyandi	26	1	1	0	16	1	0	1	1	1	1	0	0	1	1	0		0	1	1	0	1	1	1	1	0	1	1
0	650	18/11/2010	0	Semonyandi	26	1	1	1	13	0				1	1	0	1	0	1	0		0	1	1	0	0	0	1	1	0	1	0
0	651	18/11/2010	0	Semonyandi	26	1	1	0	14	1	1	0	1	1	1	0	1	1	1	0		0	1	1	0	0	1	0	1	1	1	1
0	652	18/11/2010	0	Semonyandi	26	1	1	1	13	1	0	0	1	1	1	1	1	0	1	0		0	1	1	0	0	1	0	1	0	1	1
0	653	18/11/2010	0	Semonyandi	26	1	1	1	14	1	0	1	1	1	1	1	1	1	1	0		0	1	1	0	1	1	1	1	0	1	0
0	654	18/11/2010	0	Semonyandi	26	1	1	1	14	0				1	1	1	0	1	1	0		0	1	1	0	0	0	0	1	1	1	1
0	655	18/11/2010	0	Semonyandi	26	1	1	1	16	1	0	1	1	1	1	0	1	1	1	0		0	1	1	0	1	1	1	1	1	0	1
0	656	18/11/2010	0	Semonyandi	26	1	1	1	14	1	1	0	1	1	1	1	1	1	1	0		0	0			1	0	0	1	0	1	0
0	657	18/11/2010	0	Semonyandi	26	1	1	0	14	0				1	1	0	0	1	0	0		0	1	1	0	1	1	0	1	0	1	0
0	658	18/11/2010	0	Semonyandi	26	1	1	0	13	1	0	0	1	1	1	1	0	1	1	1	1	0	0			0	1	1	1	0	1	1
0	659	18/11/2010	0	Semonyandi	26	1	1	1	12	0				1	1	0	0	1	0	0		0	1	1	0	0	1	0	1	1	1	1
0	660	18/11/2010	0	Semonyandi	26	1	1	1	13	1	0	0	1	1	1	0	0	1	0	0		0	1	1	0	1	1	1	1	0	1	1
0	661	18/11/2010	0	Semonyandi	26	1	1	0	14	1	0	1	1	1	1	0	1	1	1	0		0	1	1	0	1	1	1	0	0	1	1
0	662	18/11/2010	0	Semonyandi	26	1	1	1	12	1	0	1	1	1	1	1	1	1	1	1	0	0	0			1	1	1	1	0	1	0
0	663	18/11/2010	0	Semonyandi	26	1	1	1	14	1	0	1	1	1	1	0	1	1	1	0		0	0			1	1	1	1	0	0	1
0	664	18/11/2010	0	Semonyandi	26	1	1	1	13	1	0	0	1	1	0	1	0	1	1	1	0	0	1	1	0	0	1	0	1	0	1	1
0	665	18/11/2010	0	Semonyandi	26	1	1	1	14	1	0	0	1	1	0	1	1	1	1	1	0	0	1	1	0	0	1	0	0	0	1	1
0	666	18/11/2010	0	Semonyandi	26	1	1	0	17	1	1	0	1	1	1	0	1	1	1	1	0	0	1	0	0	1	1	0	1	1	1	1
0	667	18/11/2010	0	Semonyandi	26	1	1	1	13	1	0	1	1	1	1	0	1	1	1	0		0	1	1	0	0	1	1	1	1	1	0
0	668	18/11/2010	0	Semonyandi	26	1	1	0	16	1	0	1	1	1	1	1	0	1	1	1	0	1	1	1	0	1	1	1	1	0	1	1
0	669	18/11/2010	0	Semonyandi	26	1	1	1	17	1	0	0	1	1	1	0	0	1	1	1	0	0	1	0	0	1	1	0	1	0	1	1
0	670	18/11/2010	0	Semonyandi	26	1	1	0	15	1	0	1	1	1	1	1	1	1	1	1	0	0	1	1	0	1	1	1	1	0	0	1
0	671	18/11/2010	0	Semonyandi	26	1	1	1	13	1	0	1	1	1	1	0	0	1	0	0		0	1	1	0	0	1	0	1	0	1	1
0	672	18/11/2010	0	Semonyandi	26	1	1	1	15	1	0	1	1	1	1	0	0	1	1	0		0	1	1	0	0	1	0	1	1	1	1
0	673	18/11/2010	0	Semonyandi	26	1	1	0	16	1	0	1	1	1	1	1	0	1	1	1	1	0	0			0	1	0	1	1	1	1
0	674	18/11/2010	0	Semonyandi	26	1	1	1	13	1	0	1	1	0									0			1	1	1	1	0	0	1
0	675	18/11/2010	0	Semonyandi	26	1	1	1	14	0				1	1	0	1	1	1	0		0	1	1	0	1	0	1	1	1	1	1
0	676	18/11/2010	0	Semonyandi	26	1	1	0	14	0				1	1	0	1	0	0	0		0	1	1	0	1	1	1	1	1	1	0
0	677	18/11/2010	0	Semonyandi	26	1	1	1	13	1	0	1	1	1	1	0	1	1	1	0		0	1	1	0	0	0	1	0	1	1	1
0	678	18/11/2010	0	Semonyandi	26	1	1	1	15	1	0	1	1	1	1	0	1	1	1	0		0	1	1	0	0	1	0	1	1	1	1
0	354	4/11/2010	0	Silaloda	27	0	1	1	14	1	1	1	1	1	1	0	0	1	1	0		0	1	1	0	1	1	1	1	1	1	0
0	355	4/11/2010	0	Silaloda	27	0	1	1	12	1	1	0	0	1	0	1	0	0	0	0		0	1	1	0	1	1	0	0	1	0	1
0	356	4/11/2010	0	Silaloda	27	0	1	1	13	1	0	1	1	1	0	0	0	1	1	0		0	1	1	0	0	1	0	0	0	0	0
0	357	4/11/2010	0	Silaloda	27	0	1	1	13	1	1	0	1	1	0	1	1	1	0	1	0	0	1	1	0	1	0	0	1	1	1	1
0	358	4/11/2010	0	Silaloda	27	0	1	1	16	1	1	0	0	1	1	0	1	1	1	1	0	0	0			1	1	1	1	1	0	1
0	359	4/11/2010	0	Silaloda	27	0	1	0	15	1	1	0	0	0									1	1	0	0	0	0	0	1	1	1
0	360	4/11/2010	0	Silaloda	27	0	1	1	15	1	1	1	1	1	1	0	1	1	1	1	0	0	1	1	0	0	1	0	1	1	1	1
0	361	4/11/2010	0	Silaloda	27	0	1	1	13	1	1	1	1	1	1	0	1	1	1	1	0	0	1	1	0	0	1	0	0	1	1	1
0	362	4/11/2010	0	Silaloda	27	0	1	1	15	1	0	0	1	0									0			1	1	1	1	1	1	1
0	363	4/11/2010	0	Silaloda	27	0	1	1	14	1	0	0	0	1	1	0	1	1	1	0		0	1	0	0	1	1	1	0	1	0	1
0	365	4/11/2010	0	Silaloda	27	0	1	1	13	1	1	1	1	1	0	1	1	1	1	1	0	0	1	1	0	0	0	0	0	1	1	1
0	366	4/11/2010	0	Silaloda	27	0	1	1	16	1	1	1	1	1	1	0	1	1	1	1	1	0	1	1	0	0	1	1	1	1	0	1
0	367	4/11/2010	0	Silaloda	27	0	1	1	16	1	0	0	0	1	0	1	1	1	1	0		0	1	0	0	1	1	0	0	1	1	1
0	368	4/11/2010	0	Silaloda	27	0	1	0	13	1	1	1	0	1	0	1	0	1	1	1	1	0	0			0	0	0	0	1	1	0
0	369	4/11/2010	0	Silaloda	27	0	1	1	14	1	0	0	1	1	1	0	0	1	1	1	1	0	1	1	0	1	1	1	0	0	1	1
0	370	4/11/2010	0	Silaloda	27	0	1	1	16	1	1	1	1	1	1	0	1	1	1	1	1	0	1	1	0	1	1	0	0	1	1	1
0	371	4/11/2010	0	Silaloda	27	0	1	0	13	1	1	1	0	1	0	1	0	1	1	1	1	0	1	0	0	0	0	0	0	0	1	0
0	372	4/11/2010	0	Silaloda	27	0	1	0	15	1	1	1	1	1	1	0	1	0	1	1	0	0	0			0	1	0	0	1	0	0
0	373	4/11/2010	0	Silaloda	27	0	1	1	17	1	1	0	1	1	1	0	0	1	0	0		0	0			0	1	0	0	1	0	0
0	374	4/11/2010	0	Silaloda	27	0	1	1	13	1	0	1	1	1	0	1	1	1	1	0		0	1	1	0	1	1	1	1	0	1	0
0	375	4/11/2010	0	Silaloda	27	0	1	0	14	1	1	0	1	1	1	0	1	1	1	1	0	0	1	1	0	0	0	0	1	0	0	1
0	376	4/11/2010	0	Silaloda	27	0	1	1	15	1	1	0	1	1	1	0	1	1	0	1	0	0	1	1	0	1	1	0	0	0	0	0
0	377	4/11/2010	0	Silaloda	27	0	1	0	15	1	1	1	1	1	1	0	1	1	1		1	0	1	1	0	1	1	1	0	1	0	1
0	379	4/11/2010	0	Silaloda	27	0	1	0	13	0				1	1	0	0	1	1	0		0				1	1	1	0	0	1	0
0	380	4/11/2010	0	Silaloda	27	0	1	1	16	1	1	1	1	1	1	0	1	0	1	1	0	0	1	1	1	1	1	0	1	1	1	1
0	381	4/11/2010	0	Silaloda	27	0	1	0	15	0				1	0	1	1	1	0	0		0	0			0	0	0	1	1	1	1
0	383	4/11/2010	0	Silaloda	27	0	1	1	16	0				0									1	1	0	1	1	0	0	0	0	0
0	384	4/11/2010	0	Silaloda	27	0	1	0	14	1	1	0	1	1	1	0	1	1	1	0		0	0			1	1	1	0	1	0	1
0	385	4/11/2010	0	Silaloda	27	0	1	0	14	0				1	0	1	1	0	0	0		0	1	0	0	1	1	1	0	1	1	1
0	386	4/11/2010	0	Silaloda	27	0	1	1	16	1	0	1	1	1	1	0	1	1	0	0		0	1	1	0	1	1	1	0	1	0	1
0	387	4/11/2010	0	Silaloda	27	0	1	1	12	1	1	1	1	1	1	0	1	1	0	0		0	1	0	0	1	1	1	1	1	1	1
0	388	4/11/2010	0	Silaloda	27	0	1	1	15	1	1	0	1	0									1	0	0	1	1	0	1	1	0	1
0	389	4/11/2010	0	Silaloda	27	0	1	1	14	0				1	1	0	1	1	1	0		0	1	1	0	1	1	0	1	0	1	1
0	390	4/11/2010	0	Silaloda	27	0	1	0	13	1	0	0	1	0									1	0	0	1	1	0	0	1	0	1
0	391	4/11/2010	0	Silaloda	27	0	1	0	12	1	0	1	1	1	1	0	1	1	1	1	0	0	1	1	0	1	1	1	0	1	1	1
0	392	4/11/2010	0	Silaloda	27	0	1	0	14	0				1	0	1	1	1	1	1	0	0	1	1	0	0	0	0	1	1	1	0
0	393	4/11/2010	0	Silaloda	27	0	1	0	15	1	1	0	0	1	0	1	1	0	1	0		0	1	0	0	1	1	0	0	1	1	0
0	394	4/11/2010	0	Silaloda	27	0	1	0	13	1	0	1	1	1	0	1	1	0	1	0		0	1	1	0	0	1	0	0	1	1	0
0	395	4/11/2010	0	Silaloda	27	0	1	0	12	1	1	1	1	1	1	0	1	0	1	1	1	0	1	1	0	0	0	0	1	1	0	0
0	396	4/11/2010	0	Silaloda	27	0	1	0	15	1	0	1	1	1	0	1	1	1	1	0		0	0			1	1	1	0	0	1	1
0	397	4/11/2010	0	Silaloda	27	0	1	0	16	1	1	0	1	1	1	0	1	1	1	0		0	1	1	0	1	1	1	0	1	1	0
0	398	4/11/2010	0	Silaloda	27	0	1	0	14	1	0	1	1	0									0			1	1	1	0	0	1	0
0	479	18/11/2010	0	Simhha	28	0	1	1	12	1	1	0	1	0									0			0	0	0	1	0	1	1
0	480	18/11/2010	0	Simhha	28	0	1	0	13	1	0	1	1	1	0	1	1	1	1	1	1	0	1	0	0	1	1	1	0	0	1	1
0	481	18/11/2010	0	Simhha	28	0	1	0	15	1	1	1	1	0									0			0	0	0	0	0	1	1
0	482	18/11/2010	0	Simhha	28	0	1	0	13	1	1	0	1	1	1	0	1	1	1	0		0	0			1	0	0	1	0	1	1
0	483	18/11/2010	0	Simhha	28	0	1	0	17	1	0	1	0	1	1	0	1	1	1	0		0	1	0	0	1	1	0	0	0	1	1
0	484	18/11/2010	0	Simhha	28	0	1	1	14	1	0	0	0	1	0	1	1	1	1	0		1	1	1	0	0	1	0	0	1	1	1
0	485	18/11/2010	0	Simhha	28	0	1	1	16	1	0	0	0	1	1	0	0	1	0	1	0	0	0			0	1	1	1	0	0	0
0	486	18/11/2010	0	Simhha	28	0	1	1	13	1	1	1	1	1	1	0	1	1	1	0		0	1	1	0	1	1	0	1	0	1	0
0	487	18/11/2010	0	Simhha	28	0	1	1	14	1	0	0	1	1	1	0	1	1	0	1	1	0	1	1	0	1	1	1	0	0	0	1
0	488	18/11/2010	0	Simhha	28	0	1	1	16	0				1	1	0	1	0	1	1	1	0	0			0	0	0	1	0	1	1
0	489	18/11/2010	0	Simhha	28	0	1	1	15	1	0	1	1	0									0			1	1	1	1	0	1	1
0	490	18/11/2010	0	Simhha	28	0	1	1	13	1	0	0	0	1	0	1	1	1	1	1	1	0	1	1	0	0	1	0	1	0	1	1
0	491	18/11/2010	0	Simhha	28	0	1	1	13	0				1	1	1	1	1	1	1	1	0	0			1	1	1	1	0	1	0
0	492	18/11/2010	0	Simhha	28	0	1	1	13	0				1	1	1	1	1	0	1	1	0	0			1	1	0	1	0	1	0
0	493	18/11/2010	0	Simhha	28	0	1	1	17	1	1	0	1	1	0	1	1	1	1	0		0	0			1	1	1	1	0	1	0
0	494	18/11/2010	0	Simhha	28	0	1	0	13	1	0	1	1	1	0	1	1	1	1	0		0	0			1	0	1	0	0	0	1
0	495	18/11/2010	0	Simhha	28	0	1	1	13	0				1	1	1	1	1	1	1	1	0	0			0	1	0	1	0	1	0
0	496	18/11/2010	0	Simhha	28	0	1	1	12	0				1	1	0	1	1	1	0		0	1	1	0	1	1	1	1	0	1	1
0	497	18/11/2010	0	Simhha	28	0	1	1	14	0				1	0	1	1	1	1	0		0	1	1	0	0	1	1	0	0	1	1
0	498	18/11/2010	0	Simhha	28	0	1	1	14	0				1	0	1	1	1	1	0		0	1	1	0	1	1	1	0	0	1	0
0	499	18/11/2010	0	Simhha	28	0	1	1	13	0				1	0	1	1	1	1	0		0	1	1	0	0	1	1	0	0	1	1
0	500	18/11/2010	0	Simhha	28	0	1	0	14	0				1	1	0	1	1	1	1	0	0	1	0	0	1	1	1	1	1	1	1
0	501	18/11/2010	0	Simhha	28	0	1	0	15	1	1	1	1	1	1	0	1	1	1	1	1	0	1	1	0	1	1	1	0	1	1	1
0	502	18/11/2010	0	Simhha	28	0	1	1	14	1	0	1	1	1	1	0	0	0	0	0		0	0			0	1	0	1	0	1	0
0	503	18/11/2010	0	Simhha	28	0	1	0	15	1	1	0	1	1	1	0	1	0	1	1	1	0	1	1	0	1	1	1	0	0	1	0
0	504	18/11/2010	0	Simhha	28	0	1	1	12	1	1	0	1	0									0			0	0	0	0	0	0	1
0	505	18/11/2010	0	Simhha	28	0	1	1	16	0				1	1	0	0	0	0	0		0	1	0	0	1	0	0	1	0	1	1
0	506	18/11/2010	0	Simhha	28	0	1	1	17	1	1	1	1	1	1	0	1	1	0	1	0	0	1	1	0	0	0	0	1	0	1	1
0	507	18/11/2010	0	Simhha	28	0	1	0	13	0				1	1	0	0	0	0	1	0	0	1	0	0	0	0	1	0	0	1	1
0	508	18/11/2010	0	Simhha	28	0	1	0	15	1	1	0	1	1	0	1	1	1	1	1	0	1	0			0	0	0	0	0	0	0
0	509	18/11/2010	0	Simhha	28	0	1	1	13	1	0	0	0	1	0	1	0	0	0	1	0	0	1	1	0	1	1	0	1	1	1	1
0	510	18/11/2010	0	Simhha	28	0	1	1	13	0				1	1	1	1	1	0	1	1	0	0			1	1	0	1	0	1	0
0	511	18/11/2010	0	Simhha	28	0	1	1	13	0				1	1	0	1	0	0	1	1	0	0			0	0	0	1	0	1	0
0	512	18/11/2010	0	Simhha	28	0	1	0	13	1	0	0	0	1	1	0	0	0	0	1	0	1	1	0	0	1	1	0	1	0	1	1
0	309	10/11/2010	0	Tsaayo	29	0	1	0	13	0				1	1	0	1	1	1	0		0	1	1	0	1	1	1	0	1	0	1
0	310	10/11/2010	0	Tsaayo	29	0	1	0	15	0				1	1	0	1	1	1	0		0	1	1	0	1	0	0	1	1	1	1
0	311	10/11/2010	0	Tsaayo	29	0	1	0	13	0				1	1	0	1	1	1	0		0	1	1	0	1	0	1	0	1	1	1
0	312	10/11/2010	0	Tsaayo	29	0	1	0	14	0				1	1	0	1	0	1	0		0	1	1	0	1	1	1	0	1	1	0
0	313	10/11/2010	0	Tsaayo	29	0	1	0	13	0				1	0	1	1	1	1	0		0	0			1	0	0	1	0	1	1
0	314	10/11/2010	0	Tsaayo	29	0	1	0	14	0				1	0	0	1	1	1	0		0	1	1	0	1	1	1	1	1	1	1
0	315	10/11/2010	0	Tsaayo	29	0	1	1	12	0				1	1	0	1	1	1	0		1	1	1	0	1	0	0	1	1	1	0
0	316	10/11/2010	0	Tsaayo	29	0	1	1	13	0				1	1	0	1	1	1	0		0	1	1	0	1	1	0	1	1	1	1
0	317	10/11/2010	0	Tsaayo	29	0	1	1	13	1	0	1	1	1	1	0	0	0	1	0		0	1	1	0	1	1	0	1	0	1	0
0	318	10/11/2010	0	Tsaayo	29	0	1	0	14	0				1	1	0	1	1	1	0		0	0			1	1	0	1	0	1	1
0	319	10/11/2010	0	Tsaayo	29	0	1	1	15	0				1	1	0	1	1	1	0		0	0			1	1	0	1	1	1	0
0	320	10/11/2010	0	Tsaayo	29	0	1	1	14	0				1	1	0	1	1	1	0		0	0			1	1	0	1	1	1	0
0	321	10/11/2010	0	Tsaayo	29	0	1	0	14	0				1	1	0	1	0	1	0		0	1	1	0	1	1	0	1	1	1	1
0	322	10/11/2010	0	Tsaayo	29	0	1	0	13	1	1	1	1	1	1	0	1	1	1	0		0	0			0	0	0	1	1	1	1
0	323	10/11/2010	0	Tsaayo	29	0	1	0	15	0				1	1	0	1	1	1	0		0	0			0	1	1	1	1	1	1
0	324	10/11/2010	0	Tsaayo	29	0	1	0	14	1	1	0	0	1	1	0	0	0	1	1	1	0	1	1	0	1	1	0	1	1	1	1
0	325	10/11/2010	0	Tsaayo	29	0	1	1	13	0				1	1	0	1	0	1	0		0	0			1	1	0	1	1	1	0
0	326	10/11/2010	0	Tsaayo	29	0	1	1	12	0				1	1	0	0	0	1	1	0	0	1	1	0	1	1	0	1	0	1	0
0	327	10/11/2010	0	Tsaayo	29	0	1	0	14	0				1	1	0	0	0	0	0		1	1	1	0	1	1	1	1	1	1	1
0	328	10/11/2010	0	Tsaayo	29	0	1	1	13	0				1	1	0	0	1	1	0		1	0			0	1	1	1	0	1	1
0	329	10/11/2010	0	Tsaayo	29	0	1	1	12	1	0	0	0	1	1	0	0	1	0	0		0	0			1	1	0	1	0	1	0
0	330	10/11/2010	0	Tsaayo	29	0	1	0	13	0				1	1	0	1	1	0	0		0	1	1	0	1	1	0	0	1	1	0
0	331	10/11/2010	0	Tsaayo	29	0	1	0	12	1	0	1	1	1	1	0	0	1	1	0		0	1	1	0	1	1	0	0	1	1	1
0	332	10/11/2010	0	Tsaayo	29	0	1	1	13	0				1	1	0	1	1	1	0		0	1	1	0	1	1	1	1	0	1	1
0	333	10/11/2010	0	Tsaayo	29	0	1	1	12	0				1	1	0	1	1	1	0		0	1	1	0	1	1	1	1	0	1	0
0	334	10/11/2010	0	Tsaayo	29	0	1	1	13	0				1	1	0	0	1	0	0		0	1	0	0	1	1	0	1	1	0	1
0	335	10/11/2010	0	Tsaayo	29	0	1	0	12	1	0	1	1	1	1	1	0	1	1	0		0	1	1	0	1	0	1	0	1	1	1
0	336	10/11/2010	0	Tsaayo	29	0	1	0	13	0				1	1	0	0	1	0	0		0	1	1	0	1	1	0	1	1	1	1
0	337	10/11/2010	0	Tsaayo	29	0	1	1	14	0				1	1	0	0	0	1	0		0	0			1	1	0	1	0	1	0
0	338	10/11/2010	0	Tsaayo	29	0	1	1	12	0				1	1	0	1	1	1	0		0	0			1	1	0	0	0	1	1
0	339	10/11/2010	0	Tsaayo	29	0	1	1	14	0				0									0			1	1	1	1	1	0	0
0	340	10/11/2010	0	Tsaayo	29	0	1	0	12	1	0	1	1	1	1	0	1	0	0	1	0	0	1	0	0	1	0	0	0	0	1	0
0	341	10/11/2010	0	Tsaayo	29	0	1	0	14	0				1	1	0	1	1	1	1	0	0	1	1	0	1	0	1	1	1	1	0
0	342	10/11/2010	0	Tsaayo	29	0	1	0	12	0				1	1	0	1	1	1	0		0	1	1	0	1	1	1	0	1	1	0
0	343	10/11/2010	0	Tsaayo	29	0	1	0	15	0				1	1	0	1	1	0	0		0	1	1	0	1	1	1	1	1	1	1
0	344	10/11/2010	0	Tsaayo	29	0	1	0	13	0				1	1	0	1	1	1	0		0	1	1	0	1	1	0	0	1	1	1
0	345	10/11/2010	0	Tsaayo	29	0	1	0	12	0				1	1	0	1	1	0	0		0	1	1	0	1	0	1	1	1	1	1
0	346	10/11/2010	0	Tsaayo	29	0	1	0	12	0				1	1	0	1	1	1	1	0	0	1	1	0	1	1	1	0	0	1	1
0	347	10/11/2010	0	Tsaayo	29	0	1	0	14	1	1	1	1	1	1	1	1	1	1	0		1	1	1	0	1	1	1	0	0	1	1
0	348	10/11/2010	0	Tsaayo	29	0	1	0	15	0				1	1	0	1	1	1	0		0	1	1	0	1	1	1	0	0	0	1
0	973	12/11/2010	0	Tumati	30	1	1	0	13	1	1	0	1	1	1	0	0	1	1	1	1	0	1	1	0	1	1	1	1	0	1	1
0	974	12/11/2010	0	Tumati	30	1	1	1	14	0				1	1	0	1	1	1	0		1	1	1	0	1	1	1	1	1	1	0
0	975	12/11/2010	0	Tumati	30	1	1	1	12	0				1	1	0	1	0	0	1	1	0	1	1	0	0	1	1	0	0	1	0
0	976	12/11/2010	0	Tumati	30	1	1	0	13	1	1	0	1	1	1	0	0	1	1	1	0	0	0			1	1	0	1	0	0	1
0	977	12/11/2010	0	Tumati	30	1	1	1	13	0				1	1	0	1	1	1	0		0	1	1	0	1	1	0	1	1	1	1
0	978	12/11/2010	0	Tumati	30	1	1	1	14	0				1	0	1	1	1	1	0		0	1	1	0	1	0	0	1	0	1	1
0	979	12/11/2010	0	Tumati	30	1	1	1	16	0				1	1	0	0	1	0	0		0	1	0	0	1	0	0	1	1	1	1
0	980	12/11/2010	0	Tumati	30	1	1	1	12	0				1	1	0	1	1	1	0		0	1	1	0	0	0	0	1	1	1	1
0	981	12/11/2010	0	Tumati	30	1	1	1	14	1	0	0	1	1	1	0	0	1	1	1	1	0	1	0	0	1	1	1	1	0	0	0
0	982	12/11/2010	0	Tumati	30	1	1	0	15	1	1	1	1	1	1	0	1	0	1	1	1	0	1	1	0	1	1	1	1	1	0	1
0	983	12/11/2010	0	Tumati	30	1	1	1	13	1	1	0	1	1	0	1	1	1	0	1	0	0	1	0	0	1	1	1	1	0	1	0
0	984	12/11/2010	0	Tumati	30	1	1	1	13	0				1	1	0	0	0	0	1	0	0	1	0	0	1	1	1	0	0	0	1
0	985	12/11/2010	0	Tumati	30	1	1	1	13	0	1	0	1	1	1	0	1	1	1	1	1	0	1	1	0	1	1	0	1	0	0	1
0	986	12/11/2010	0	Tumati	30	1	1	1	13	0				1	1	0	1	1	1	1	1	0	1	0	0	1	1	1	0	1	0	0
0	987	12/11/2010	0	Tumati	30	1	1	1	12	0				1	1	0	1	1	0	0		0	0			1	1	1	1	0	1	1
0	988	12/11/2010	0	Tumati	30	1	1	0	13	1	0	0	1	1	1	0	1	1	1	0		0	1	0	0	1	1	1	0	0	0	1
0	989	12/11/2010	0	Tumati	30	1	1	0	14	1	0	1	1	1	1	0	0	1	0	1	1	0	1	1	0	0	0	0	1	1	1	1
0	990	12/11/2010	0	Tumati	30	1	1	0	13	1	0	1	1	1	1	1	1	1	1	0		0	1	0	0	1	1	1	1	0	1	1
0	991	12/11/2010	0	Tumati	30	1	1	1	14	0				1	1	0	1	0	1	0		0	0			1	1	0	1	0	1	1
0	992	12/11/2010	0	Tumati	30	1	1	1	13	0				1	1	0	1	1	1	0		0	0			0	1	0	1	1	1	1
0	993	12/11/2010	0	Tumati	30	1	1	1	14	0				1	0	1	1	1	1	0		0	0			0	1	0	0	0	1	1
0	994	12/11/2010	0	Tumati	30	1	1	1	13	0				1	1	0	1	0	1	0		0	1	1	0	0	0	1	0	0	1	1
0	995	12/11/2010	0	Tumati	30	1	1	1	12	1	1	0	1	1	1	0	0	0	1	1	0	0	1	0	0	1	1	1	1	0	1	0
0	996	12/11/2010	0	Tumati	30	1	1	1	14	1	1	0	1	1	1	0	1	1	0	0		0	1	0	0	0	1	0	1	1	1	1
0	997	12/11/2010	0	Tumati	30	1	1	1	15	0				1	1	0	1	1	1	0		1	1	1	0	1	1	1	1	0	1	0
0	998	12/11/2010	0	Tumati	30	1	1	1	12	0				1	0	1	1	0	1	0		0	1	1	0	1	1	1	0	0	1	1
0	999	12/11/2010	0	Tumati	30	1	1	1	12	1	1	1	1	1	1	0	1	1	0	1	1	0	1	1	0	0	1	0	1	0	0	0
0	1000	12/11/2010	0	Tumati	30	1	1	1	13	0				1	0	1	1	1	1	0		0	1	1	0	0	1	0	1	0	1	1
0	1001	12/11/2010	0	Tumati	30	1	1	1	13	1	1	1	1	1	0	1	1	1	1	1	1	0	1	1	0	1	1	1	1	0	1	1
0	1002	12/11/2010	0	Tumati	30	1	1	1	13	0				1	0	1	1	0	1	0		0	1	0	0	1	1	0	0	1	1	1
0	1003	12/11/2010	0	Tumati	30	1	1	1	14	1	1	1	1	1	1	0	1	1	1	1	1	0	1	1	0	1	0	0	1	0	1	1
0	1004	12/11/2010	0	Tumati	30	1	1	1	13	0				1	1	0	1	1	1	0		0	0			1	1	1	1	0	0	1
0	1005	12/11/2010	0	Tumati	30	1	1	1	13	0				1	0	1	1	0	0	1	0	1	1	1	0	0	0	0	1	0	1	1
0	1272	12/11/2010	1	Alexander	31	0	1	0	16	0				1	1	0	0	0	0	1	0	0	1	1	0	1	1	0	0	1	1	1
0	1273	12/11/2010	1	Alexander	31	0	1	0	15	1	0	1	1	1	1	0	1	1	0	1	0	0	1	1	0	0	1	1	0	1	1	1
0	1274	12/11/2010	1	Alexander	31	0	1	0	16	0				1	1	0	1	1	1	0		0	1	1	0	1	1	1	1	0	1	1
0	1275	12/11/2010	1	Alexander	31	0	1	1	16	1		0	1	1	1	1	1	1	1	0		0	0			0	1	0	1	0	0	1
0	1276	12/11/2010	1	Alexander	31	0	1	1	13	0				1	1	0	0	0	1	0		0	1	1	0	0	1	0	1	0	1	1
0	1277	12/11/2010	1	Alexander	31	0	1	1	15	1	0	0	1	1	1	0	0	1	1	0		0	1	0	0	1	1	1	1	0	1	1
0	1278	12/11/2010	1	Alexander	31	0	1	1	15	0				1	1	0	1	1	0	0		0	0			1	1	0	1	0	1	1
0	1279	12/11/2010	1	Alexander	31	0	1	1	15	1	0	0	0	1	1	0	0	1	1	0		0	1	1	0	1	1	1	1	0	1	1
0	1280	12/11/2010	1	Alexander	31	0	1	0	16	1	0	0	1	1	1	1	0	1	0	0		0	0			1	1	0	1	1	1	1
0	1281	12/11/2010	1	Alexander	31	0	1	0	14	1	1	0	1	1	0	1	0	0	0	0		0	1	1	0	0	0	0	0	1	1	1
0	1282	12/11/2010	1	Alexander	31	0	1	1	13	0				1	1	0	1	1	1	0		0	0			1	0	0	1	0	1	1
0	1283	12/11/2010	1	Alexander	31	0	1	1	15	1	0	0	1	1	1	0	1	1	1	0		0	1	1	0	1	0	0	1	0	1	1
0	1284	12/11/2010	1	Alexander	31	0	1	1	14	1	0	1	1	1	1	0	1	1	1	0		0	1	1	0	1	0	0	1	0	1	1
0	1285	12/11/2010	1	Alexander	31	0	1	1	16	1	0	0	1	1	0	1	0	0	0	0		0	1	1	0	0	1	0	1	0	0	1
0	1286	12/11/2010	1	Alexander	31	0	1	1	15	0				1	1	0	1	1	1	0		0	1	1	0	1	1	1	1	0	1	1
0	1287	12/11/2010	1	Alexander	31	0	1	1	16	0				1	1	0	1	1	1	0		0	1	1	0	0	1	1	1	0	1	1
0	1288	12/11/2010	1	Alexander	31	0	1	1	14	1	0	0	1	1	0	0	1	0	1	0		0	1	1	0	1	0	1	1	1	0	0
0	1289	12/11/2010	1	Alexander	31	0	1	1	14	0				1	0	1	1	0	0	0		1	1	1	0	0	1	0	1	0	0	1
0	1290	12/11/2010	1	Alexander	31	0	1	0	15	0				1	1	0	1	1	1	0		0	1	1	0	0	1	1	1	0	0	1
0	1291	12/11/2010	1	Alexander	31	0	1	0	20	0				1	1	0	0	1	1	0		0	1	1	0	1	1	1	1	0	0	1
0	1292	12/11/2010	1	Alexander	31	0	1	0	16	0				1	1	0	1	1	1	0		0	1	1	0	1	0	0	0	1	1	1
0	1293	12/11/2010	1	Alexander	31	0	1	1	17	1	1	0	1	0									1	1	0	0	0	1	1	0	1	0
0	1294	12/11/2010	1	Alexander	31	0	1	1	14	1	0	1	1	1	1	0	1	1	1	0		0	1	1	0	1	1	1	1	1	1	1
0	1295	12/11/2010	1	Alexander	31	0	1	1	15	1	0	1	1	1	1	1	1	1	1	0		0	1	1	0	1	1	0	1	1	0	1
0	1296	12/11/2010	1	Alexander	31	0	1	1	1					1	1	1	1	1	1	0		0	1	1	0	1	1	0	1	0	0	1
0	1297	12/11/2010	1	Alexander	31	0	1	0	16	1	0	0	0	1	1	0	0	1	1	0		0	1	1	0	0	1	0		0	1	1
0	1298	12/11/2010	1	Alexander	31	0	1	0	18	1	0	0	1	1	1	0	0	1	1	0		1	1	1	0	1	0	0	1	1	1	1
0	1299	12/11/2010	1	Alexander	31	0	1	1	15	0				0									1	1	0	1	1	0	1	0	1	1
0	1300	12/11/2010	1	Alexander	31	0	1	0	18	0				1	1	0	1	1	1	0		0	1	0	0	1	1	1	0	0	1	1
0	1301	12/11/2010	1	Alexander	31	0	1	1	15	0				1	1	0	1	1	1	0		0	1	1	0	1	1	1	1	0	0	1
0	1302	12/11/2010	1	Alexander	31	0	1	1	14	1	0	0	1	1	0	1	0	0	0	1	0	0	0			0	0	0	1	1	1	1
0	1303	12/11/2010	1	Alexander	31	0	1	1	17	0				1	0	1	1	1	0	1	0	0	1	1	0	1	1	0	1	1	1	1
0	1304	12/11/2010	1	Alexander	31	0	1	1	14	1	0	1	1	1	1	0	0	0	0	1	0	1	1	1	0	0	1	1	0	1	1	1
0	1305	12/11/2010	1	Alexander	31	0	1	1	14	1	0	1	1	1	1	1	1	1	1	0		0	0			1	1	1	1	0	1	1
0	1306	12/11/2010	1	Alexander	31	0	1	1	14	0				1	1	0	1	1	1	0		0	0			1	1	0	1	0	1	1
0	1307	12/11/2010	1	Alexander	31	0	1	1	15	0				1	1	0	1	1	1	0		0	1	0	0	1	1	0	1	0	0	1
0	1308	12/11/2010	1	Alexander	31	0	1	1	16	0				1	1	0	1	1	1	0		0	1	1	0	1	1	0	0	1	1	1
0	1309	12/11/2010	1	Alexander	31	0	1	1	14	0				0									1	1	0	0	1	1	0	1	1	1
0	1310	12/11/2010	1	Alexander	31	0	1	0	17	0				1	1	0	1	1	1	1	0	0	1	1	0	0	1	1	0	0	1	0
0	1311	12/11/2010	1	Alexander	31	0	1	0	15	1	0	0	1	1	1	0	0	1	0	0		0	1	1	0	0	1	0	1	1	1	0
0	1312	12/11/2010	1	Alexander	31	0	1	0	16	1	0	0	1	1	1	0	0	0	1	0		1	1	1	0	1	1	1	1	1	1	1
0	1313	12/11/2010	1	Alexander	31	0	1	0	19	0				1	1	0	0	1	1	0		0	1	0	0	0	1	0	1	1	1	1
0	1314	12/11/2010	1	Alexander	31	0	1	0	18	0				1	1	0	1	1	1	0		0	1	1	0	0	1	0	1	0	1	1
0	1315	12/11/2010	1	Alexander	31	0	1	1	17	1	0	0	1	1	1	0	0	0	0	0		0	1	1	0	1	1	1	1	0	1	0
0	1316	12/11/2010	1	Alexander	31	0	1	1	17	0				1	1	0	1	1	1	0		0	1	1	0	1	1	0	1	0	1	0
0	2177	8/11/2010	1	Bargish	32	0	1	1	16	0				1	1	1	1	1	1	0		0	1	1	0	1	1	1	1	0	1	1
0	2178	8/11/2010	1	Bargish	32	0	1	0	16	1	0	0	1	1	1	0	1	1	1	1	1	0	1	1	0	1	1	1	0	1	1	1
0	2179	8/11/2010	1	Bargish	32	0	1	1	19	1	0	0	1	1	1	1	1	1	1	0		0	1	1	0	1	1	1	1	0	1	0
0	2180	8/11/2010	1	Bargish	32	0	1	1	17	1	0	1	1	1	1	0	0	1	1	1	0	0	0			0	1	0	0	0	1	1
0	2181	8/11/2010	1	Bargish	32	0	1	0	18	0				1	1	1	1	1	1	0		0	1	1	0	1	1	1	1	1	1	1
0	2182	8/11/2010	1	Bargish	32	0	1	0	19	1	0	0	1	1	1	0	1	0	1	0		0	0			0	1	0	1	1	0	0
0	2183	8/11/2010	1	Bargish	32	0	1	1	15	1	0	0	1	1	1	0	1	0	1	0		0	1	1	0	1	1	1	0	0	1	1
0	2184	8/11/2010	1	Bargish	32	0	1	0	14	0				1	1	0	1	0	1	0		0	1	1	0	0	1	0	1	1	0	0
0	2185	8/11/2010	1	Bargish	32	0	1	0	17	1	1	0	1	1	1	0	1	1	1	1	0	0	1	0	0	0	1	0	0	0	1	1
0	2186	8/11/2010	1	Bargish	32	0	1	0	16	1	1	1	1	1	1	0	0	1	1	0		1	1	1	0	0	1	0	1	0	1	1
0	2187	8/11/2010	1	Bargish	32	0	1	0	19	1	0	0	1	1	1	0	1	1	1	1	0	0	1	1	0	1	1	0	1	0	1	1
0	2188	8/11/2010	1	Bargish	32	0	1	0	15	1	1	1	1	1	1	0	1	1	1	0		0	1	0	0	1	1	1	0	0	1	1
0	2189	8/11/2010	1	Bargish	32	0	1	0	16	1	0	1	1	1	1	0	1	1	0	1	0	0	0	1	0	1	1	1	0	0	0	1
0	2190	8/11/2010	1	Bargish	32	0	1	1	15	1	1	1	1	1	1	1	0	1	1	1	0	0	1	1	0	0	0	0	1	0	0	1
0	2191	8/11/2010	1	Bargish	32	0	1	1	14	1	0	0	1	0									0			0	1	0	1	0	0	1
0	2192	8/11/2010	1	Bargish	32	0	1	0	17	1	0	0	0	1	1	0	1	1	1	0		0	1	1	0	1	1	1	1	0	1	1
0	2193	8/11/2010	1	Bargish	32	0	1	0	18	0				1	1	0	1	1	1	0		0	0			1	1	0	0	0	1	1
0	2194	8/11/2010	1	Bargish	32	0	1	0	16	1	0	1	0	1	1	0	1	1	0	0		0	1	0	0	1	1	0	0	0	1	1
0	2195	8/11/2010	1	Bargish	32	0	1	0	17	0				1	1	0	0	1	1	0		1	1	1	0	1	1	0	0	1	1	1
0	2196	8/11/2010	1	Bargish	32	0	1	0	17	1	0	0	1	1	1	0	1	1	1	1	0	0	1	1	0	1	1	1	1	0	1	1
0	2197	8/11/2010	1	Bargish	32	0	1	1	15	1	0	1	1	1	1	0	1	1	1	0		0	1	1	0	0	0	0	1	1	1	0
0	2198	8/11/2010	1	Bargish	32	0	1	1	16	1	0	1	1	1	1	0	1	1	0	1	0	0	1	1	0	0	1	0	0	1	1	1
0	2199	8/11/2010	1	Bargish	32	0	1	1	15	1	0	1	1	1	1	0	1	1	1	0		0	1	1	0	1	1	1	1	0	1	1
0	2200	8/11/2010	1	Bargish	32	0	1	0	16	1	0	1	1	1	1	0	1	1	0	0		0	1	1	0	1	1	1	1	1	1	0
0	2201	8/11/2010	1	Bargish	32	0	1	0	15	0				1	1	0	1	1	1	0		0	1	1	0	1	1	1	0	0	1	1
0	2202	8/11/2010	1	Bargish	32	0	1	0	18	1	1	0	1	1	1	1	1	1	1	0		0	1	1	0	1	1	1	1	1	1	1
0	2203	8/11/2010	1	Bargish	32	0	1	0	18	1	0	0	1	1	1	0	1	1	1	1	0	0	1	0	0	1	1	1	1	1	1	1
0	2204	8/11/2010	1	Bargish	32	0	1	1	14	0				1	0	1	0	1	1	1	0	0	1	1	0	1	1	0	0	0	1	1
0	2205	8/11/2010	1	Bargish	32	0	1	0	16	1	0	0	1	1	1	0	0	0	1	0		0	1	1	0	0	0	0	0	1	1	1
0	2206	8/11/2010	1	Bargish	32	0	1	0	19	1	0	1	1	1	1	0	0	0	1	0		0	1	1	0	0	1	1	0	0	0	1
0	2207	8/11/2010	1	Bargish	32	0	1	0	15	1	1	1	1	0									0			0	1	0	0	0	0	1
0	2208	8/11/2010	1	Bargish	32	0	1	1	15	0				0									0			1	0	0	0	0	1	1
0	2209	8/11/2010	1	Bargish	32	0	1	0	15	1	1	1	1	1	1	0	1	1	1	1	1	0	1	1	0	1	1	0	0	1	1	1
0	2210	8/11/2010	1	Bargish	32	0	1	0	14	0				1	1	0	1	0	1	0		0	1	1	0	0	0	0	1	1	0	0
0	2211	8/11/2010	1	Bargish	32	0	1	0	15	1	0	1	1	1	1	1	0	1	1	0		0	1	1	0	1	1	1	0	1	1	1
0	2212	8/11/2010	1	Bargish	32	0	1	1	15	1	0	1	1	1	1	0	1	1	1	0		0	1	1	0	0	1	1	1	1	1	1
0	2213	8/11/2010	1	Bargish	32	0	1	1	15	0				1	1	1	1	0	1	1	0	0	1	1	0	1	1	0	1	1	1	1
0	2214	8/11/2010	1	Bargish	32	0	1	1	15	0				0									0			1	0	0	1	0	1	1
0	2215	8/11/2010	1	Bargish	32	0	1	1	14	1	1	1	1	1	1	0	0	0	0	1	1	0	1	1	0	0	0	0	1	1	1	1
0	2216	8/11/2010	1	Bargish	32	0	1	0	16	1	0	1	1	1	1	1	1	1	1	1	0	1	1	0	0	1	1	0	1	1	1	1
0	2217	8/11/2010	1	Bargish	32	0	1	0	17	1	0	1	1	1	1	0	1	1	1	1	0	0	0			0	1	0	1	0	1	1
0	2218	8/11/2010	1	Bargish	32	0	1	1	18	0				0									0			0	0	0	0	0	0	1
0	2219	8/11/2010	1	Bargish	32	0	1	0	15	0				1	1	0	1	1	1	0		0	1	0	0	1	1	0	0	1	1	1
0	2046	4/11/2010	1	Bashay	33	1	1	1	14	1	1	1	1	1	0	1	1	1	1	1	1	0	1	1	0	0	1	1	0	1	1	0
0	2047	4/11/2010	1	Bashay	33	1	1	0	17	0				1	1	0	0	1	0	0		0	1	0	0	1	1	1	0	1	1	1
0	2048	4/11/2010	1	Bashay	33	1	1	0	17	0				1	1	0	1	1	0	0		0	0			1	1	0	0	0	0	1
0	2049	4/11/2010	1	Bashay	33	1	1	0	15	1	0	1	1	1	1	1	1	1	1	1	0	0	1	1	0	1	1	1	0	0	1	1
0	2050	4/11/2010	1	Bashay	33	1	1	1	16	0				1	1	0	1	1	0	1	0	0	0			1	1	1	1	1	1	1
0	2051	4/11/2010	1	Bashay	33	1	1	1	15	0				1	1	1	1	1	1	1	0	0	1	0	0	1	1	0	1	0	1	1
0	2052	4/11/2010	1	Bashay	33	1	1	0	17	0				1	1	1	0	0	0	0		0	0			1	1	1	1	1	1	1
0	2053	4/11/2010	1	Bashay	33	1	1	0	19	1	0	1	1	1	1	0	1	1	1	1	0	0	1	1	0	1	1	1	1	0	1	1
0	2054	4/11/2010	1	Bashay	33	1	1	1	18	0				1	1	0	1	1	1	0		0	1	1	0	1	1	0	1	0	1	1
0	2055	4/11/2010	1	Bashay	33	1	1	0	15	0				1	1	0	1	1	1	0		0	1	1	0	0	1	0	1	0	1	1
0	2056	4/11/2010	1	Bashay	33	1	1	0	16	0				1	1	0	1	1	1	1	1	0	1	0	0	1	1	0	0	0	0	1
0	2057	4/11/2010	1	Bashay	33	1	1	0	16	0				1	1	0	1	1	1	0		0	1	1	0	0	1	0	0	0	0	1
0	2058	4/11/2010	1	Bashay	33	1	1	0	15	1	1	1	1	0									0			0	1	0	0	0	1	1
0	2059	4/11/2010	1	Bashay	33	1	1	0	18	1	0	0	0	1	1	0	1	1	1	0		0	0			0	1	1	0	1	1	1
0	2060	4/11/2010	1	Bashay	33	1	1	0	16	1	0	0	1	1	1	0	1	1	1	1	0	0	1	1	0	0	1	0	1	1	1	1
0	2061	4/11/2010	1	Bashay	33	1	1	1	17	0				1	1	0	1	1	1	0		0	0			1	1	1	1	1	0	1
0	2062	4/11/2010	1	Bashay	33	1	1	0	16	1	1	1	0	1	1	0	0	0	1	1	0	0	1	1	0	0	1	1	1	0	1	0
0	2063	4/11/2010	1	Bashay	33	1	1	0	16	1	0	1	1	1	1	0	0	1	1	0		0	1	1	0	1	1	0	0	0	1	1
0	2064	4/11/2010	1	Bashay	33	1	1	0	16	1	1	1	1	1	1	0	1	1	1	1	0	0	1	1	0	1	1	0	1	0	0	1
0	2065	4/11/2010	1	Bashay	33	1	1	0	18	0				1	1	1	1	1	1	1	0	0	1	1	0	1	1	0	0	0	1	1
0	2066	4/11/2010	1	Bashay	33	1	1	1	17	0				1	1	0	1	1	1	0		0	1	1	0	1	1	1	1	0	1	1
0	2067	4/11/2010	1	Bashay	33	1	1	1	16	0				1	0	1	1	0	1	1	0	1	1	1	0	1	1	1	1	1	1	1
0	2068	4/11/2010	1	Bashay	33	1	1	0	17	0				1	1	0	1	1	1	0		0	1	1	0	1	1	1	1	0	1	1
0	2069	4/11/2010	1	Bashay	33	1	1	0	18	0				1	1	0	1	1	1	0		0	1	1	0	0	1	0	0	0	0	1
0	2070	4/11/2010	1	Bashay	33	1	1	1	17	0				1	0	0	1	1	1	0		0	1	1	0	0	1	1	1	0	1	1
0	2071	4/11/2010	1	Bashay	33	1	1	1	15	0				1	0	1	1	1	1	0		0	1	1	0	1	1	0	1	1	0	0
0	2072	4/11/2010	1	Bashay	33	1	1	1	16	0				0									1	1	0	0	0	1	1	1	0	1
0	2073	4/11/2010	1	Bashay	33	1	1	1	15	0				1	1	1	1	1	0	0		0	1	1	0	1	1	1	1	0	1	1
0	2074	4/11/2010	1	Bashay	33	1	1	0	18	0				1	1	0	1	1	1	0		1	0			0	1	0	1	1	0	1
0	2075	4/11/2010	1	Bashay	33	1	1	1	18	0				1	0	1	1	1	0	0		0	1	1	0	1	1	1	1	1	0	1
0	2076	4/11/2010	1	Bashay	33	1	1	1	15	1	0	1	1	1	1	0	1	1	1	0		0	1	1	0	1	1	0	0	0	1	1
0	2077	4/11/2010	1	Bashay	33	1	1	1	15	0				1	1	0	1	1	1	0		1	1	1	0	1	1	1	1	0	1	1
0	2078	4/11/2010	1	Bashay	33	1	1	1	16	1	0	1	1	1	1	0	1	1	0	0		0	1	1	0	0	1	1	0	0	1	1
0	2079	4/11/2010	1	Bashay	33	1	1	1	16	1	0	0	0	1	1	0	0	1	1	1	0	0	1	1	0	0	0	0	0	0	1	1
0	2080	4/11/2010	1	Bashay	33	1	1	1	15	0				1	0	1	1	0	1	0		0	0			0	1	0	0	0	0	1
0	2081	4/11/2010	1	Bashay	33	1	1	1	15	0				1	1	0	1	0	1	0		1	0			0	0	0	0	0	1	1
0	2082	4/11/2010	1	Bashay	33	1	1	1	15	0				1	1	0	0	0	1	0		0	1	1	0	1	1	1	0	0	1	1
0	2083	4/11/2010	1	Bashay	33	1	1	1	15	0				1	1	1	0	0	1	1	0	0	0			0	1	0	1	0	1	1
0	2084	4/11/2010	1	Bashay	33	1	1	1	15	0				1	1	1	0	1	1	1	1	0	1	1	0	0	1	0	1	0	1	1
0	2085	4/11/2010	1	Bashay	33	1	1	1	16	0				1	1	0	1	1	1	0		0	0			0	1	0	0	1	1	1
0	2086	4/11/2010	1	Bashay	33	1	1	0	15	0				1	1	1	1	1	1	1	0	1	1	1	0	0	1	0	1	0	1	1
0	2087	4/11/2010	1	Bashay	33	1	1	1	16	0				1	1	0	1	1	0	0		0	0			0	0	0	0	1	1	1
0	2088	4/11/2010	1	Bashay	33	1	1	1	14	0				1	1	1	0	1	1	1	0	0	0			0	1	0	0	0	1	1
0	2089	4/11/2010	1	Bashay	33	1	1	1	16	0				1	0	1	0	1	1	1	0	0	1	1	0	1	1	1	0	0	0	1
0	1537	4/11/2010	1	Bishop_Hhando	34	0	1	1	16	1	0	0	1	1	1	0	1	1	1	0		0	1	1	0	1	1	0	0	0	0	1
0	1538	4/11/2010	1	Bishop_Hhando	34	0	1	1	17	0				0									1	1	0	1	1	1	1	0	1	1
0	1539	4/11/2010	1	Bishop_Hhando	34	0	1	1	16	1	0	0	1	1	1	0	1	1	1	0		0	1	1	0	1	1	1	1	1	1	1
0	1540	4/11/2010	1	Bishop_Hhando	34	0	1	0	18	1	1	0	1	1	1	0	1	1	1	1	0	0	1	1	0	1	1	1	0	0	1	1
0	1541	4/11/2010	1	Bishop_Hhando	34	0	1	1	16	0				1	1	0	1	1	0	0		1	1	1	0	1	0	0	1	0	0	0
0	1542	4/11/2010	1	Bishop_Hhando	34	0	1	0	16	1	0	1	1	0									0			1	0	0	0	0	0	1
0	1543	4/11/2010	1	Bishop_Hhando	34	0	1	1	16	0				1	1	0	1	1	1	1	1	0	0			1	1	0	0	0	1	1
0	1544	4/11/2010	1	Bishop_Hhando	34	0	1	1	18	0				1	1	0	1	1	1	0		0	1	0	0	0	1	0	0	0	1	1
0	1545	4/11/2010	1	Bishop_Hhando	34	0	1	1	16	1	0	0	0	1	1	0	0	1	1	1	0	0	1	1	0	1	1	1	1	0	1	1
0	1546	4/11/2010	1	Bishop_Hhando	34	0	1	1	17	1	0	0	1	1	1	0	1	0	1	1	0	0	1	1	0	1	1	1	0	0	1	1
0	1547	4/11/2010	1	Bishop_Hhando	34	0	1	0	18	1	0	1	1	1	1	0	1	1	1	1	0	1	1	1	0	1	1	1	1	0	1	1
0	1548	4/11/2010	1	Bishop_Hhando	34	0	1	1	16	0				1	1	0	1	1	1	0		0	1	1	0	1	1	0	0	0	1	1
0	1549	4/11/2010	1	Bishop_Hhando	34	0	1	0	18	1	0	1	1	1	0	1	0	1	1	1	0	1	1	1	0	1	1	1	0	0	0	1
0	1550	4/11/2010	1	Bishop_Hhando	34	0	1	0	15	0				1	0	1	1	1	1	0	0	0	0			1	1	1	0	1	1	1
0	1551	4/11/2010	1	Bishop_Hhando	34	0	1	0	15	1	1	1	1	1	1	0	1	1	0	0		0	0			1	1	1	1	1	0	1
0	1552	4/11/2010	1	Bishop_Hhando	34	0	1	1	16	1	0	0	1	1	0	1	1	1	0	0		0	1	0	0	1	1	1	1	0	0	0
0	1553	4/11/2010	1	Bishop_Hhando	34	0	1	1	16	1	0	1	1	1	0	1	1	1	0	1	0	0	1	0	0	1	1	1	0	1	0	1
0	1554	4/11/2010	1	Bishop_Hhando	34	0	1	0	17	1	0	0	1	1	1	0	1	1	1	0		0	1	1	0	1	1	0	0	0	1	1
0	1555	4/11/2010	1	Bishop_Hhando	34	0	1	0	19	0				1	0	1	0	1	0	1	0	0	1	1	0	0	0	0	0	0	1	1
0	1556	4/11/2010	1	Bishop_Hhando	34	0	1	0	18	1	0	0	1	1	1	0	0	1	1	0		0	0			1	1	1	1	0	1	0
0	1557	4/11/2010	1	Bishop_Hhando	34	0	1	0	18	1	0	0	1	1	1	0	0	1	1	0		0	0			1	1	1	1	0	1	0
0	1558	4/11/2010	1	Bishop_Hhando	34	0	1	0	16	1	0	0	0	1	1	0	0	1	0	0		1	1	1	0	1	1	1	1	0	0	0
0	1559	4/11/2010	1	Bishop_Hhando	34	0	1	0	18	0				1	1	0	0	1	0	0		0	0			1	1	1	1	1	0	1
0	1560	4/11/2010	1	Bishop_Hhando	34	0	1	1	16	0				1	1	0	1	1	1	0		0	0			1	1	0	0	0	1	1
0	1561	4/11/2010	1	Bishop_Hhando	34	0	1	0	16	1	0	1	1	1	0	1	1	1	1	1	0	0	1	1	0	0	1	0	0	0	1	1
0	1562	4/11/2010	1	Bishop_Hhando	34	0	1	0	18	0				1	1	0	0	1	1	0		0	1	1	0	1	1	0	0	1	1	1
0	1563	4/11/2010	1	Bishop_Hhando	34	0	1	0	16	0				1	1	0	1	1	1	0		0	0			1	1	1	0	0	1	1
0	1564	4/11/2010	1	Bishop_Hhando	34	0	1	1	15	1	1	1	1	1	1	1	1	1	1	0		0	1	1	0	1	1	1	1	1	1	1
0	1565	4/11/2010	1	Bishop_Hhando	34	0	1	1	15	0				1	1	0	0	1	1	0		0	0			1	1	0	0	0	1	1
0	1566	4/11/2010	1	Bishop_Hhando	34	0	1	1	15	0				1	1	0	1	1	1	0		0	1	1	0	1	1	0	0	0	1	1
0	1567	4/11/2010	1	Bishop_Hhando	34	0	1	1	15	1	1	1	1	1	1	0	1	1	0	0		0	0			0	1	1	0	0	1	1
0	1568	4/11/2010	1	Bishop_Hhando	34	0	1	0	18	1	0	1	1	1	1	0	1	1	1	0		0	1	1	0	1	1	1	0	1	1	1
0	1569	4/11/2010	1	Bishop_Hhando	34	0	1	0	18	1	1	1	1	1	0	1	0	1	1	1	0	0	1	1	0	1	1	1	0	1	1	1
0	1570	4/11/2010	1	Bishop_Hhando	34	0	1	1	18	0				1	0	1	1	1	1	0		0	0			1	1	1	0	0	0	1
0	1571	4/11/2010	1	Bishop_Hhando	34	0	1	1	16	1	1	1	1	1	1	0	0	1	0	0		0	1	1	0	1	1	1	0	0	0	1
0	1572	4/11/2010	1	Bishop_Hhando	34	0	1	0	16	1	1	0	1	1	0	1	1	1	1	1	0	0	0			1	1	1	0	0	0	1
0	1573	4/11/2010	1	Bishop_Hhando	34	0	1	1	17	0				1	1	0	1	1	1	1	0	0	1	1	0	0	1	1	1	0	1	1
0	1574	4/11/2010	1	Bishop_Hhando	34	0	1	1	14	1	0	1	1	1	1	0	1	0	1	1	0	0	0			0	1	0	1	1	1	1
0	1575	4/11/2010	1	Bishop_Hhando	34	0	1	0	18	1	0	1	1	1	1	0	1	1	0	0		0	0			1	1	1	0	0	1	1
0	1576	4/11/2010	1	Bishop_Hhando	34	0	1	1	16	0				1	1	0	1	1	1	0		0	0			1	1	1	1	0	1	1
0	1577	4/11/2010	1	Bishop_Hhando	34	0	1	1	18	0				1	1	0	0	1	0	1	0	0	1	1	0	0	1	1	1	1	0	1
0	1578	4/11/2010	1	Bishop_Hhando	34	0	1	1	16	0				0									0			1	1	0	0	0	1	1
0	2002	8/11/2010	1	Daudi	35	0	1	0	18	1	1	0	1	1	1	1	1	1	1	0		0	1	1	0	1	1	1	1	0	1	1
0	2003	8/11/2010	1	Daudi	35	0	1	0	20	1	0	1	1	1	1	1	1	1	1	0		0	1	1	0	1	1	1	1	1	1	1
0	2004	8/11/2010	1	Daudi	35	0	1	0	18	1	1	0	1	1	1	1	1	1	1	0		0	0			0	1	1	1	1	1	1
0	2005	8/11/2010	1	Daudi	35	0	1	0	16	0				1	0	0	1	1	1	1	0	0	1	1	0	0	1	0	1	1	1	1
0	2006	8/11/2010	1	Daudi	35	0	1	0	17	1	1	0	1	1	1	0	1	1	1	1	0	0	1	1	0	1	1	1	1	1	1	1
0	2007	8/11/2010	1	Daudi	35	0	1	1	17	1	0	0	1	1	1	0	1	1	1	0		0	1	1	0	1	1	1	0	0	1	1
0	2008	8/11/2010	1	Daudi	35	0	1	0	16	0				1	1	0	0	1	1	1	0	1	0			0	1	0	1	1	1	0
0	2009	8/11/2010	1	Daudi	35	0	1	1	16	1	1	1	1	1	1	0	0	1	1	0		0	1	1	0	1	0	0	1	1	1	1
0	2010	8/11/2010	1	Daudi	35	0	1	0	19	1	0	0	1	1	1	0	1	1	1	1	0	0	1	1	0	1	1	1	1	0	1	0
0	2011	8/11/2010	1	Daudi	35	0	1	0	14	1	1	1	1	1	1	0	0	0	0	1	0	0	1	1	0	0	1	1	1	0	1	1
0	2012	8/11/2010	1	Daudi	35	0	1	0	18	0				1	1	0	1	1	1	0		0	1	1	0	0	0	0	1	1	1	1
0	2013	8/11/2010	1	Daudi	35	0	1	0	16	1	0	0	1	1	1	0	0	1	1	0		0	1	0	0	1	1	1	1	0	1	0
0	2014	8/11/2010	1	Daudi	35	0	1	0	16	0				1	0	1	1	1	1	1	0	0	1	1	0	1	1	1	0	0	1	1
0	2015	8/11/2010	1	Daudi	35	0	1	1	17	1	1	0	1	1	1	1	0	1	0	0		0	1	0	0	1	0	0	1	0	1	0
0	2016	8/11/2010	1	Daudi	35	0	1	0	18	0				1	1	1	1	1	1	0		0	1	1	0	1	1	1	0	0	1	1
0	2017	8/11/2010	1	Daudi	35	0	1	1	17	0				1	1	0	1	1	1	0		0	1	0	0	1	1	1	1	0	1	1
0	2018	8/11/2010	1	Daudi	35	0	1	0	15	1	0	1	1	1	1	1	1	1	0	1	1	0	1	1	0	1	1	1	1	0	1	1
0	2019	8/11/2010	1	Daudi	35	0	1	1	16	0				1	1	0	0	1	0	1	0	0	1	1	0	1	1	1	1	1	1	0
0	2020	8/11/2010	1	Daudi	35	0	1	1	17	1	1	1	1	1	1	1	0	1	1	0		0	1	1	0	1	1	1	0	0	1	1
0	2021	8/11/2010	1	Daudi	35	0	1	0	17	1	1	0	1	1	1	0	1	1	1	0		0	1	1	0	1	1	1	1	1	1	1
0	2022	8/11/2010	1	Daudi	35	0	1	1	15	1	0	0	1	1	1	0	0	1	1	0		0	1	1	0	0	1	0	1	1	1	1
0	2023	8/11/2010	1	Daudi	35	0	1	1	18	1	0	1	1	1	1	0	1	1	0	0		0	1	1	0	0	1	1	1	1	1	0
0	2024	8/11/2010	1	Daudi	35	0	1	1	16	0				1	0	1	1	0	1	1	0	0	1	0	0	1	1	0	1	0	1	1
0	2025	8/11/2010	1	Daudi	35	0	1	1	17	1	0	1	1	1	1	1	1	1	1	0		0	1	1	0	1	1	1	1	1	1	1
0	2026	8/11/2010	1	Daudi	35	0	1	1	16	1	1	0	1	1	1	0	1	1	1	0		0	1	1	0	1	1	1	1	1	1	1
0	2027	8/11/2010	1	Daudi	35	0	1	1	16	1	0	1	1	1	1	1	1	1	1	1	0	0	1	1	0	1	1	1	1	1	1	1
0	2028	8/11/2010	1	Daudi	35	0	1	1	16	1	1	1	1	1	1	0	1	1	1	0		0	1	1	0	1	1	1	0	1	1	0
0	2029	8/11/2010	1	Daudi	35	0	1	1	15	0				1	1	1	1	1	0	0		0	1	0	0	0	1		0	0	1	1
0	2030	8/11/2010	1	Daudi	35	0	1	0	17	0				1	1	0	1	1	1	0		0	0			1	1	1	0	0	1	1
0	2031	8/11/2010	1	Daudi	35	0	1	0	18	1	0	1	1	1	1	0	0	1	1	0		0	1	1	0	0	0	0	1	1	1	1
0	2032	8/11/2010	1	Daudi	35	0	1	0	15	1	1	0	1	1	1	0	1	1	1	1	0	0	1	1	0	1	1	1	0	0	1	1
0	2033	8/11/2010	1	Daudi	35	0	1	1	15	0				1	1	0	1	1	1	0		0	1	1	0	1	1	1	1	1	1	0
0	2034	8/11/2010	1	Daudi	35	0	1	0	17	0				1	1	0	1	1	1	1	1	0	0			1	1	1	1	1	1	1
0	2035	8/11/2010	1	Daudi	35	0	1	0	15	1	0	0	0	0									0			1	1	1	0	1	1	0
0	2036	8/11/2010	1	Daudi	35	0	1	0	16	1	0	1	1	1	1	0	1	1	1	0		0	1	0	0	1	1	1	0	1	1	1
0	2037	8/11/2010	1	Daudi	35	0	1	1	14	1	0	0	1	1	1	1	1	1	1	0		1	1	1	0	1	0	0	0	1	1	1
0	2038	8/11/2010	1	Daudi	35	0	1	1	17	1	1	1	1	1	1	1	1	1	1	1	1	0	1	0	0	1	1	1	1	1	1	1
0	2039	8/11/2010	1	Daudi	35	0	1	1	17	1	1	0	1	1	1	1	0	1	0	1	1	0	1	1	0	1	1	1	1	0	0	1
0	2040	8/11/2010	1	Daudi	35	0	1	1	16	1	1	1	1	1	1	1	0	1	0	0		0	0			1	1	0	1	1	1	1
0	2041	8/11/2010	1	Daudi	35	0	1	1	17	1	1	0	1	1	1	0	1	1	1	1	1	0	1	1	0	1	0	0	1	0	1	0
0	2042	8/11/2010	1	Daudi	35	0	1	0	16	0				1	1	0	1	1	1	0		0	0			1	1	1	1	0	1	1
0	2043	8/11/2010	1	Daudi	35	0	1	1	17	1	0	1	1	1	1	1	0	1	1	0		0	1	1	0	1	1	1	0	1	1	0
0	2044	8/11/2010	1	Daudi	35	0	1	1	17	1	0	1	1	1	1	1	0	1	1	1	0	0	1	1	0	1	1	1	1	1	1	1
0	2045	8/11/2010	1	Daudi	35	0	1	1	17	1	1	1	1	1	1	1	1	1	0	0		0	1	0	0	1	1	1	1	1	1	1
0	1579	4/11/2010	1	Dinamu	36	1	1	0	18	1	0	0	1	1	1	0	1	1	1	1	1	0	1	1	0	1	1	1	0	1	1	1
0	1580	4/11/2010	1	Dinamu	36	1	1	0	19	1	0	0	0	1	1	0	0	1	1	1	0	0	1	1	0	0	1	0	1	0	0	1
0	1581	4/11/2010	1	Dinamu	36	1	1	1	17	0				1	1	0	0	1	1	0		0	1	1	0	1	1	0	1	0	0	1
0	1582	4/11/2010	1	Dinamu	36	1	1	1	14	1	0	1	1	1	1	0	1	0	1	0		0	1	0	0	1	1	1	1	0	1	1
0	1583	4/11/2010	1	Dinamu	36	1	1	0	14	1	0	1	1	1	1	0	1	1	1	1	0	0	1	1	0	1	1	1	1	1	1	1
0	1584	4/11/2010	1	Dinamu	36	1	1	0	18	0				1	1	0	0	1	1	0		0	1	1	0	0	1	1	1	1	0	1
0	1585	4/11/2010	1	Dinamu	36	1	1	1	16	1	0	1	1	1	1	0	1	1	0	1	0	0	1	1	0	1	0	0	0	0	1	1
0	1586	4/11/2010	1	Dinamu	36	1	1	0	17	1	0	1	1	1	1	0	1	1	1	1	1	0	1	1	0	1	1	0	0	0	1	1
0	1587	4/11/2010	1	Dinamu	36	1	1	0	18	0				0									0			1	1	1	1	0	1	1
0	1588	4/11/2010	1	Dinamu	36	1	1	0	16	1	0	1	1	1	1	0	1	1	1	0	0	1	1	0	0	1	1	0	0	1	1	1
0	1589	4/11/2010	1	Dinamu	36	1	1	0	15	1	0	1	1	1	1	0	0	1	1	0		0	1	1	0	1	1	1	0	1	1	1
0	1590	4/11/2010	1	Dinamu	36	1	1	0	17	1	0	0	1	1	1	1	1	1	1	0		0	1	1	0	1	0	1	1	1	1	1
0	1591	4/11/2010	1	Dinamu	36	1	1	1	17	1	1	1	0	1	1	0	1	1	1	1	0	0	0			0	1	1	0	1	1	1
0	1592	4/11/2010	1	Dinamu	36	1	1	1	14	0				1	1	0	1	1	1	0		0	1	1	0	1	1	0	1	1	1	1
0	1593	4/11/2010	1	Dinamu	36	1	1	0	16	1	0	1	1	1	0	1	1	1	0	1	0	0	1	1	0	1	1	0	0	0	1	1
0	1594	4/11/2010	1	Dinamu	36	1	1	0	19	1	0	0	1	1	1	0	1	1	1	0		0	1	1	0	1	1	1	1	0	0	1
0	1595	4/11/2010	1	Dinamu	36	1	1	0	17	1	0	0	0	1	0	1	1	1	1	1	0	0	1	0	0	1	1	1	1	0	1	1
0	1596	4/11/2010	1	Dinamu	36	1	1	1	16	1	0	1	1	1	1	1	1	1	1	0		1	1	1	0	1	1	0	1	1	1	1
0	1597	4/11/2010	1	Dinamu	36	1	1	0	17	1	0	1	1	1	1	0	1	1	1	0		0	1	1	0	0	1	1	0	0	1	1
0	1598	4/11/2010	1	Dinamu	36	1	1	1	17	1	1	0	1	1	1	1	1	1	1	1	0	0	1	1	0	1	1	1	1	0	1	1
0	1599	4/11/2010	1	Dinamu	36	1	1	0	18	0				1	1	0	1	1	1	0		0	1	1		1	1	1	1	0	1	1
0	1600	4/11/2010	1	Dinamu	36	1	1	0	19	1	0	0	1	1	1	0	1	1	1	1	0	0	1	1	0	1	1	1	1	1	1	1
0	1601	4/11/2010	1	Dinamu	36	1	1	0	17	1	0	1	0	0									0			0	1	0	1	0	1	1
0	1602	4/11/2010	1	Dinamu	36	1	1	0	18	1	0	0	0	1	1	0	1	1	1	0		0	1	0	0	1	1	1	1	0	0	1
0	1603	4/11/2010	1	Dinamu	36	1	1	0	16	0				1	1	0	1	1	1	0		0	1	1	0	1	1	1	0	1	0	1
0	1604	4/11/2010	1	Dinamu	36	1	1	0	17	0				1	1	0	1	1	1	0		0	1	1	0	0	1	1	1	0	1	1
0	1605	4/11/2010	1	Dinamu	36	1	1	0	17	0				1	0	1	1	0	1	1	0	0	1	1	0	0	1	1	0	0	1	0
0	1606	4/11/2010	1	Dinamu	36	1	1	0	16	1	0	1	1	1	1	0	0	1	0	0		0	1	1	0	1	1	1	0	0	0	1
0	1607	4/11/2010	1	Dinamu	36	1	1	1	17	1	1	1	1	1	1	0	1	1	1	0		0	1	1	0	1	1	1	0	0	1	1
0	1608	4/11/2010	1	Dinamu	36	1	1	1	16	1	0	0	1	1	1	0	1	1	1	0		0	1	0	0	1	1	1	0	1	1	1
0	1609	4/11/2010	1	Dinamu	36	1	1	1	17	1	1	0	1	1	1	0	0	1	1	0		0	0			1	0	1	1	0	0	1
0	1610	4/11/2010	1	Dinamu	36	1	1	0	18	0				1	0	1	1	1	1	1	0	0	0			1	1	0	0	0	0	1
0	1611	4/11/2010	1	Dinamu	36	1	1	0	15	1	1	1	1	1	1	0	1	1	1	1	0	0	1	1	0	1	1	0	0	0	1	1
0	1612	4/11/2010	1	Dinamu	36	1	1	1	15	1	1	1	1	1	1	1	0	1	1	1	0	0	1	1	0	0	1	0	0	0	1	1
0	1613	4/11/2010	1	Dinamu	36	1	1	0	16	0				1	1	0	0	1	1	0		0	1	1	0	1	1	0	1	0	0	1
0	1614	4/11/2010	1	Dinamu	36	1	1	1	16	1	0	0	1	1	1	0	1	1	0	1	0	0	0			0	0	0	0	0	1	1
0	1615	4/11/2010	1	Dinamu	36	1	1	0	16	1	1	0	1	1	1	0	1	1	1	1	1	0	1	1	0	1	1	1	1	0	1	1
0	1616	4/11/2010	1	Dinamu	36	1	1	1	15	1	0	1	1	1	1	0	1	1	1	1	1	0	1	1	0	1	1	0	1	0	1	1
0	1617	4/11/2010	1	Dinamu	36	1	1	1	17	1	0	1	1	1	1	0	0	1	1	0		0	1	1	0	0	1	0	1	1	1	1
0	1618	4/11/2010	1	Dinamu	36	1	1	1	15	1	0	1	1	1	1	1	0	1	0	1	0	0	1	1	0	1	1	1	1	0	1	1
0	1619	4/11/2010	1	Dinamu	36	1	1	0	15	1	0	0	1	0									1	1	0	0	0	1	1	0	0	1
0	1620	4/11/2010	1	Dinamu	36	1	1	0	16	1	0	0	0	0									0			0	1	0	0	0	0	1
0	1621	4/11/2010	1	Dinamu	36	1	1	1	17	1	0	0	1	1	1	0	1	1	1	0		0	0			0	1	0	0	1	1	0
0	1141	11/11/2010	1	Dongobesh_Se	37	1	1	1	18	0				0									1	0	0	0	1	0	1	1	1	1
0	1142	11/11/2010	1	Dongobesh_Sec	37	1	1	0	16	0				0									1	1	0	0	0	0	1	1	1	1
0	1143	11/11/2010	1	Dongobesh_Sec	37	1	1	0	16	1	0	1	1	0									1	1	0	0	0	0	1	1	1	1
0	1144	11/11/2010	1	Dongobesh_Sec	37	1	1	1	16	0				1	1	0	1	1	0	0		0	1	1	0	0	0	0	1	1	0	1
0	1145	11/11/2010	1	Dongobesh_Sec	37	1	1	1	17	1	0	1	1	1	1	0	0	1	0	0		0	1	1	0	1	1	1	1	0	0	0
0	1146	11/11/2010	1	Dongobesh_Sec	37	1	1	0	16	1	0	1	1	1	1	1	1	1	1	1	0	0	1	1	0	0	1	1	0	1	0	0
0	1147	11/11/2010	1	Dongobesh_Sec	37	1	1	0	21	0				1	1	0	1	1	1	1	1	0	1	1	0	0	1	0	1	0	1	1
0	1405	18/11/2010	1	Dr_Olsen	38	0	1	0	14	0				1	1	0	1	1	1	0		0	1	1	1	0	1	1	1	1	1	1
0	1406	18/11/2010	1	Dr_Olsen	38	0	1	0	16	0				1	1	0	1	1	1	0		0	1	1	1	1	0	1	1	0	1	1
0	1407	18/11/2010	1	Dr_Olsen	38	0	1	0	18	1	0	1	1	1	1	0	1	1	1	1	0	0	1	1	0	1	1	1	1	1	1	1
0	1408	18/11/2010	1	Dr_Olsen	38	0	1	0	16	1	0	1	1	1	1	0	1	1	1	1	0	0	1	1	0	1	1	1	1	1	0	1
0	1409	18/11/2010	1	Dr_Olsen	38	0	1	0	16	0				0									1	1	1	0	0	0	0	0	1	1
0	1410	18/11/2010	1	Dr_Olsen	38	0	1	1	14	1	1	1	1	1	1	0	1	1	1	1	0	0	1	1	0	1	0	0	1	0	1	1
0	1411	18/11/2010	1	Dr_Olsen	38	0	1	1	14	0				1	1	0	0	1	1	0		0	1	1	0	0	1	1	1	0	1	0
0	1412	18/11/2010	1	Dr_Olsen	38	0	1	1	15	0				1	1	0	1	1	1	1	0	0	1	1	0	0	1	1	1	1	0	1
0	1413	18/11/2010	1	Dr_Olsen	38	0	1	0	17	1	0	1	1	1	1	0	1	1	1	1	0	0	1	1	0	1	1	1	1	0	0	1
0	1414	18/11/2010	1	Dr_Olsen	38	0	1	1	15	1	1	1	1	1	1	0	1	1	1	1	0	0	1	1	0	1	1	0	1	0	1	1
0	1415	18/11/2010	1	Dr_Olsen	38	0	1	1	14	0				1	1	0	1	1	1	0		0	1	1	0	0	1	0	1	0	1	0
0	1416	18/11/2010	1	Dr_Olsen	38	0	1	1	15	1	0	1	1	1	1	0	0	1	1	0		0	1	1	0	0	1	1	0	0	1	1
0	1417	18/11/2010	1	Dr_Olsen	38	0	1	0	15	0				1	1	0	1	1	1	0		0	1	1	0	1	1	1	1	1	1	1
0	1418	18/11/2010	1	Dr_Olsen	38	0	1	1	14	0				1	1	0	1	1	1	0		0	1	1	1	1	0	0	1	1	1	1
0	1419	18/11/2010	1	Dr_Olsen	38	0	1	1	17	0				1	1	0	1	1	1	0		0	1	1	1	1	1	1	1	1	0	1
0	1420	18/11/2010	1	Dr_Olsen	38	0	1	0	18	0				1	1	0	1	1	1	0		0	1	1	0	1	1	1	1	1	1	1
0	1421	18/11/2010	1	Dr_Olsen	38	0	1	1	16	0				1	1	0	0	1	1	0		0	1	1	1	0	1	1	1	0	0	0
0	1422	18/11/2010	1	Dr_Olsen	38	0	1	0	15	0				1	1	0	1	1	1	1	0	0	1	1	0	1	1	1	1	1	0	1
0	1423	18/11/2010	1	Dr_Olsen	38	0	1	0	19	1	0	0	1	1	1	0	1	1	1	0		0	1	1	0	1	1	1	1	1	0	1
0	1424	18/11/2010	1	Dr_Olsen	38	0	1	0	15	1	0	0	1	1	1	0	1	1	1	1	0	0	1	1	0	1	1	1	1	1	1	1
0	1425	18/11/2010	1	Dr_Olsen	38	0	1	0	16	0				1	1	0	1	1	1	1	0	0	1	1	1	0	1	1	0	1	1	1
0	1426	18/11/2010	1	Dr_Olsen	38	0	1	0	18	1	0	0	1	1	1	0	1	1	1	1	0	0	1	1	0	1	1	1	1	1	1	1
0	1427	18/11/2010	1	Dr_Olsen	38	0	1	1	16	0				1	1	0	0	1	1	0		0	1	1	0	0	1	0	1	1	1	1
0	1428	18/11/2010	1	Dr_Olsen	38	0	1	1	15	1	0	1	1	1	1	0	1	1	1	0		0	1	1	1	0	1	0	1	1	1	1
0	1429	18/11/2010	1	Dr_Olsen	38	0	1	0	16	0				1	1	0	1	1	1	0		0	1	1	0	0	1	0	0	1	1	0
0	1430	18/11/2010	1	Dr_Olsen	38	0	1	1	14	0				1	1	0	1	1	1	0		0	1	1	0	0	1	1	1	0	1	1
0	1431	18/11/2010	1	Dr_Olsen	38	0	1	1	14	0				1	1	0	0	1	1	0		0	1	1	0	0	1	0	1	1	1	1
0	1432	18/11/2010	1	Dr_Olsen	38	0	1	1	14	0				1	1	0	1	1	1	0		0	1	1	0	0	1	1	1	1	1	1
0	1433	18/11/2010	1	Dr_Olsen	38	0	1	0	16	1	0	1	1	1	1	0	0	1	1	0		0	1	1	0	0	0	0	1	1	0	1
0	1434	18/11/2010	1	Dr_Olsen	38	0	1	1	15	1	0	1	1	1	1	0	0	1	1	0		0	1	1	0	0	0	0	1	0	1	1
0	1435	18/11/2010	1	Dr_Olsen	38	0	1	0	17	1	0	0	1	1	1	0	1	1	1	1	0	0	1	1	1	1	1	1	1	1	1	1
0	1436	18/11/2010	1	Dr_Olsen	38	0	1	0	15	1	0	1	1	1	1	0	1	1	1	1	0	0	1	1	1	1	0	1	1	1	1	1
0	1437	18/11/2010	1	Dr_Olsen	38	0	1	0	17	1	0	1	1	1	1	0	1	1	1	0		0	1	1	0	1	1	0	1	1	1	1
0	1438	18/11/2010	1	Dr_Olsen	38	0	1	1	15	0				1	1	0	1	1	1	1	0	0	1	1	1	0	0	0	1	1	1	1
0	1439	18/11/2010	1	Dr_Olsen	38	0	1	1	15	1	1	0	0	1	1	0	0	1	1	0		0	1	1	0	0	1	0	1	1	1	1
0	1440	18/11/2010	1	Dr_Olsen	38	0	1	1	14	0				1	1	0	1	1	1	0		0	1	1	0	1	1	0	1	1	1	1
0	1441	18/11/2010	1	Dr_Olsen	38	0	1	1	16	0				1	1	0	1	1	1	0		0	1	1	1	1	1	0	1	0	1	1
0	1442	18/11/2010	1	Dr_Olsen	38	0	1	1	16	0				1	1	0	0	1	1	1	0	0	1	1	1	1	1	1	1	0	1	1
0	1443	18/11/2010	1	Dr_Olsen	38	0	1	0	15	0				1	1	0	1	1	1	0		0	1	1	0	0	1	0	1	0	1	1
0	1444	18/11/2010	1	Dr_Olsen	38	0	1	1	14	1	0	1	1	1	1	0	1	1	1	0		0	1	1	0	0	1	0	1	1	1	1
0	1445	18/11/2010	1	Dr_Olsen	38	0	1	1	15	0				1	1	0	1	1	1	0		0	1	1	1	1	1	1	1	1	1	1
0	1446	18/11/2010	1	Dr_Olsen	38	0	1	1	17	0				1	1	0	1	1	1	0		0	1	1	1	1	1	1	1	1	1	1
0	1447	18/11/2010	1	Dr_Olsen	38	0	1	1	17	0				1	1	0	1	1	1	0		0	1	1	1	1	1	1	1	0	1	1
0	1448	18/11/2010	1	Dr_Olsen	38	0	1	1	15	0				1	1	0	0	1	1	0		0	1	1	0	1	1	1	1	1	0	1
0	1449	18/11/2010	1	Dr_Olsen	38	0	1	1	15	0				1	1	0	1	1	1	0		0	1	1	0	1	1	0	0	1	1	1
0	1148	12/11/2010	1	Endoji	39	0	1	0	16	1	0	1	1	1	1	1	1	1	1	0		0	1	1	0	1	1	1	0	0	1	1
0	1149	12/11/2010	1	Endoji	39	0	1	0	15	1	0	0	0	1	0	1	0	0	0	0		1	1	1	0	1	1	0	0	1	1	1
0	1150	12/11/2010	1	Endoji	39	0	1	0	19	0				1	1	0	1	1	1	0		0	1	1	0	1	1	1	0	0	1	0
0	1151	12/11/2010	1	Endoji	39	0	1	0	18	1	1	1	0	1	1	0	1	1	1	1	0	0	1	1	0	1	1	1	0	0	0	0
0	1152	12/11/2010	1	Endoji	39	0	1	1	15	0				1	1	0	0	1	0	1	0	0	0			1	1	1	1	1	1	1
0	1153	12/11/2010	1	Endoji	39	0	1	1	15	1	0	0	1	1	0	1	1	1	1	0		0	1	1	0	0	1	0	0	0	1	0
0	1154	12/11/2010	1	Endoji	39	0	1	1	15	0				1	1	0	0	1	0	1	1	0	0			1	1	1	1	0	1	1
0	1155	12/11/2010	1	Endoji	39	0	1	1	14	1	0	1	0	1	0	0	1	0	0	0		1	0			0	1	1	1	0	1	1
0	1156	12/11/2010	1	Endoji	39	0	1	1	15	0				1	1	0	1	0	1	0		0	0			0	1	0	0	0	0	1
0	1157	12/11/2010	1	Endoji	39	0	1	1	16	1	0	1	1	1	1	0	1	1	1	1	0	0	1	1	0	0	0	0	0	0	1	1
0	1158	12/11/2010	1	Endoji	39	0	1	1	15	1	0	0	1	1	0	0	1	1	0	1	0	0	0			0	1	0	1	0	0	1
0	1159	12/11/2010	1	Endoji	39	0	1	1	16	1	0	1	1	1	0	1	1	1	1	0		0	1	1	0	0	0	0	0	1	1	1
0	1160	12/11/2010	1	Endoji	39	0	1	0	15	0				1	1	0	0	1	1	0		0	0			1	1	1	0	1	0	0
0	1161	12/11/2010	1	Endoji	39	0	1	0	14	0				0									1	1	0	1	1	0	0	0	1	1
0	1162	12/11/2010	1	Endoji	39	0	1	0	16	1	1	1	1	1	0	0	1	1	1	0		0	1	0	0	0	0	0	1	0	1	1
0	1163	12/11/2010	1	Endoji	39	0	1	1	16	1	0	1	1	1	1	0	1	1	1	1	0	0	1	1	0	0	0	0	1	0	1	1
0	1164	12/11/2010	1	Endoji	39	0	1	1	16	0				1	1	0	1	1	1	1	0	0	1	1	0	1	1	1	1	1	1	1
0	1165	12/11/2010	1	Endoji	39	0	1	1	15	1	0	0	1	1	1	0	1	1	1	0		0	0			0	1	0	1	0	1	1
0	1166	12/11/2010	1	Endoji	39	0	1	1	15	0				1	1	0	1	0	0	0		0	1	1	0	0	1	0	0	0	1	1
0	1167	12/11/2010	1	Endoji	39	0	1	1	15	0				1	1	0	1	1	0	0		0	1	1	0	0	1	0	0	0	1	1
0	1168	12/11/2010	1	Endoji	39	0	1	1	15	0				1	1	0	1	1	0	0		0	1	1	0	0	1	0	0	0	0	1
0	1169	12/11/2010	1	Endoji	39	0	1	0	14	1	0	1	1	1	1	0	1	1	1	1	0	0	1	0	0	0	1	0	1	0	1	1
0	1170	12/11/2010	1	Endoji	39	0	1	0	15	1	0	1	1	1	1	0	1	1	1	1	0	0	1	0	0	0	1	0	1	1	0	0
0	1171	12/11/2010	1	Endoji	39	0	1	0	16	1	0	1	1	1	1	0	1	1	1	0		0	1	1	0	1	1	0	1	1	1	1
0	1172	12/11/2010	1	Endoji	39	0	1	0	14	1	1	1	0	1	1	0	1	1	0	1	0	1	1	0	0	1	0	0	0	0	1	0
0	1173	12/11/2010	1	Endoji	39	0	1	0	16	0				1	1	0	1	1	0	0		0	0			1	1	1	0	1	0	1
0	1174	12/11/2010	1	Endoji	39	0	1	0	16	0				1	1	0	1	1	1	0		0	0			1	1	0	1	1	1	1
0	1175	12/11/2010	1	Endoji	39	0	1	1	14	0				1	0	0	0	1	1	0		0	0			1	1	0	0	0	1	1
0	1176	12/11/2010	1	Endoji	39	0	1	0	16	0				1	1	0	1	1	1	1	0	0	1	1	0	1	1	1	1	1	1	0
0	1177	12/11/2010	1	Endoji	39	0	1	1	16	1	0	1	1	1	1	0	1	1	1	1	0	0	1	1	0	1	1	1	0	0	1	1
0	1178	12/11/2010	1	Endoji	39	0	1	0	18	1	0	1	1	1	0	1	0	0	0	1	0	0	1	1	0	1	1	1	0	0	1	1
0	1179	12/11/2010	1	Endoji	39	0	1	1	15	1	0	1	1	1	1	0	1	1	1	0		0	1	1	0	1	1	0	1	0	1	1
0	1180	12/11/2010	1	Endoji	39	0	1	1	16	1	0	0	1	1	0	1	1	1	1	1	1	0	0			1	1	0	0	0	0	1
0	1181	12/11/2010	1	Endoji	39	0	1	1	17	1	0	1	1	1	1	0	1	1	1	0		0	1	1	0	1	1	1	1	0	0	1
0	1182	12/11/2010	1	Endoji	39	0	1	1	14	1	0	1	1	1	1	1	1	1	1	1	0	0	0			1	1	0	0	0	1	1
0	1183	12/11/2010	1	Endoji	39	0	1	0	18	0				1	1	0	1	1	1	1	0	0	1	1	0	0	0	0	1	1	0	1
0	1184	12/11/2010	1	Endoji	39	0	1	1	16	1	0	0	1	1	1	1	0	1	1	1	0	0	0			1	1	0	0	0	1	1
0	1185	12/11/2010	1	Endoji	39	0	1	1	14	0				1	1	0	1	1	1	0		0	0			0	1	0	1	0	1	1
0	1186	12/11/2010	1	Endoji	39	0	1	1	16	0				1	1	0	1	1	1	0		0	0			1	1	0	1	1	1	1
0	1187	12/11/2010	1	Endoji	39	0	1	1	14	1	0	0	1	1	1	0	0	1	0	0		0	0			0	1	0	1	0	1	1
0	1188	12/11/2010	1	Endoji	39	0	1	1	17	1	0	0	1	1	0	1	1	1	1	0		0	1	1	0	1	1	1	0	1	1	1
0	1189	12/11/2010	1	Endoji	39	0	1	0	16	1	0	0	1	1	1	1	1	1	1	0		0	0			1	1	1	1	1	1	1
0	1190	12/11/2010	1	Endoji	39	0	1	0	15	1	1	0	1	1	0	0	1	1	1	0		0	1	1	0	0	1	1	1	1	1	1
0	1191	12/11/2010	1	Endoji	39	0	1	1	15	0				1	0	0	0	1	0	1	0	0	1	1	0	1	1	0	0	1	1	0
0	1192	12/11/2010	1	Endoji	39	0	1	1	15	0				1	1	0	0	0	0	1	0	0	0			1	1	0	0	1	1	1
0	1622	8/11/2010	1	Gehandu	40	1	1	1	16	0				1	1	0	1	1	1	0		0	0			1	1	1	1	1	0	1
0	1623	8/11/2010	1	Gehandu	40	1	1	0	15	1	1	1	1	1	1	0	1	1	1	1	0	0	0			1	1	0	1	1	1	1
0	1624	8/11/2010	1	Gehandu	40	1	1	0	16	0				1	1	0	1	1	1	0		0	0			1	1	1	0	1	1	1
0	1625	8/11/2010	1	Gehandu	40	1	1	0	17	0				1	1	1	0	1	1	0		1	1	1	0	1	1	1	1	1	1	1
0	1626	8/11/2010	1	Gehandu	40	1	1	0	19	1	0	0	1	1	1	1	1	1	0	1	0	0	1	1	0	1	1	1	1	1	1	1
0	1627	8/11/2010	1	Gehandu	40	1	1	1	15	0				1	1	0	0	1	1	0		0	1	1	0	1	1	1	1	1	1	1
0	1628	8/11/2010	1	Gehandu	40	1	1	1	17	1	0	1	1	1	0	1	0	1	1	0		1	1	1	0	0	1	0	1	0	1	1
0	1629	8/11/2010	1	Gehandu	40	1	1	0	17	1	1	1	1	1	1	1	1	1	1	0		0	0			0	1	0	1	1	1	1
0	1630	8/11/2010	1	Gehandu	40	1	1	1	17	0				1	1	1	0	1	0	0		0	0			0	0	0	1	0	0	1
0	1631	8/11/2010	1	Gehandu	40	1	1	0	15	1	1	0	1	1	1	1	1	1	1	0		0	1	1	0	1	1	1	0	1	1	1
0	1632	8/11/2010	1	Gehandu	40	1	1	0	16	1	1	1	1	1	1	1	1	1	1	0		0	1	1	0	1	1	1	1	0	1	1
0	1633	8/11/2010	1	Gehandu	40	1	1	0	17	1	0	1	1	1	1	0	0	1	0	1	0	0	1	1	0	1	1	0	1	1	1	1
0	1634	8/11/2010	1	Gehandu	40	1	1	0	15	1	0	1	1	1	1	0	1	1	1	0		0	1	1	0	1	1	0	1	0	1	0
0	1635	8/11/2010	1	Gehandu	40	1	1	1	16	1	0	0	1	1	0	1	1	0	1	0		0	1	1	0	0	0	0	1	1	1	1
0	1637	8/11/2010	1	Gehandu	40	1	1	1	16	1	0	0	1	1	1	1	0	1	0	0		0	0			1	1	1	1	0	1	1
0	1638	8/11/2010	1	Gehandu	40	1	1	0	15	0				1	1	0	0	1	0	0		1	0			1	1	1	1	1	1	0
0	1639	8/11/2010	1	Gehandu	40	1	1	1	16	0				1	0	1	1	1	1	0		0	0			0	0	0	0	0	1	1
0	1640	8/11/2010	1	Gehandu	40	1	1	1	15	0				1	1	0	1	1	1	0		0	1	1	0	0	0	0	1	1	1	1
0	1641	8/11/2010	1	Gehandu	40	1	1	0	15	1	0	1	1	1	1	1	1	1	1	0		0	1	1	0	1	1	1	1	1	1	1
0	1642	8/11/2010	1	Gehandu	40	1	1	1	15	0				1	1	0	1	1	1	0		0	0			0	1	0	0	0	1	1
0	1644	8/11/2010	1	Gehandu	40	1	1	1	15	0				1	1	1	1	1	1	1	1	0	1	1	0	1	1	1	1	1	1	0
0	1645	8/11/2010	1	Gehandu	40	1	1	0	16	1	0	1	1	1	1	0	1	1	1	0		0	1	1	0	1	1	0	0	1	1	1
0	1646	8/11/2010	1	Gehandu	40	1	1	1	16	0				1	0	1	0	1	1	0		0	0			0	1	0	0	1	1	1
0	1647	8/11/2010	1	Gehandu	40	1	1	1	17	0				1	1	0	0	0	0	0		0	0			1	1	1	1	0	0	0
0	1648	8/11/2010	1	Gehandu	40	1	1	0	16	0				1	1	0	1	1	1	1	0	0	1	1	0	1	1	0	1	0	1	1
0	1649	8/11/2010	1	Gehandu	40	1	1	0	17	0				1	1	0	0	1	1	1	0	0	1	1	0	1	1	1	1	1	1	1
0	1650	8/11/2010	1	Gehandu	40	1	1	0	17	1	1	0	1	1	1	0	1	1	1	1	0	1	1	1	0	1	1	0	0	0	1	0
0	1651	8/11/2010	1	Gehandu	40	1	1	1	16	1	1	1	1	1	1	0	1	0	0	0		0	1	1	0	1	0	0	0	0	0	0
0	1652	8/11/2010	1	Gehandu	40	1	1	0	16	1	0	0	1	1	1	1	1	0	1	0		1	1	1	0	0	1	0	1	0	1	1
0	1653	8/11/2010	1	Gehandu	40	1	1	0	16	1	0	1	1	1	1	1	1	1	1	1	0	0	1	1	0	1	1	1	0	1	1	1
0	1654	8/11/2010	1	Gehandu	40	1	1	1	15	0				1	1	0	1	1	1	0		1	0			1	1	0	1	0	0	1
0	1655	8/11/2010	1	Gehandu	40	1	1	0	14	1	0	1	1	1	1	0	0	1	1	0		0	1	1	0	1	1	1	1	1	1	1
0	1656	8/11/2010	1	Gehandu	40	1	1	0	16	1	0	1	1	1	1	0	1	1	1	1	1	1	1	1	0	1	1	1	1	1	1	1
0	1657	8/11/2010	1	Gehandu	40	1	1	0	16	1	1	1	1	1	1	1	1	1	1	0		0	1	1	0	0	1	0	1	1	0	1
0	1658	8/11/2010	1	Gehandu	40	1	1	1	16	0				1	1	0	1	1	1	1	0	0	0			1	1	1	1	0	1	1
0	1659	8/11/2010	1	Gehandu	40	1	1	0	15	0				0									0			0	1	0	1	0	0	1
0	1660	8/11/2010	1	Gehandu	40	1	1	1	15	0				1	1	0	1	1	0	0		0	1	1	0	1	1	0	0	0	1	1
0	1661	8/11/2010	1	Gehandu	40	1	1	1	15	1	0	1	1	1	1	0	1	1	1	0		1	1	1	0	1	1	0	1	1	1	1
0	1662	8/11/2010	1	Gehandu	40	1	1	1	14	0				1	1	0	1	1	1	0		0	0			0	0	0	0	0	0	1
0	1663	8/11/2010	1	Gehandu	40	1	1	0	20	1	1	0	1	1	1	0	0	1	1	1	0	0	1	0	0	1	1	1	1	1	1	0
0	1664	8/11/2010	1	Gehandu	40	1	1	1	15	1	1	1	1	1	1	1	0	1	1	1	0	0	1	1	0	0	1	0	0	1	1	1
0	1665	8/11/2010	1	Gehandu	40	1	1	1	14	1	0	1	1	1	1	1	1	1	1	1	0	0	1	1	0	0	1	0	0	1	1	1
0	1666	8/11/2010	1	Gehandu	40	1	1	1	15	0				0									1	1	0	1	1	1	1	0	1	1
0	749	15/11/2010	1	Gidhim	41	0	1	1	13	0				1	1	0	1	1	1	0		0	1	1	0	1	1	0	0	0	1	1
0	1827	15/11/2010	1	Gidhim	41	0	1	1	15	0				1	0	1	1	1	1	0		0	1	1	0	1	0	0	0	0	0	1
0	1828	15/11/2010	1	Gidhim	41	0	1	1	17	1	1	0	1	1	1	0	1	1	1	0		0	0			1	1	1	1	1	0	1
0	1829	15/11/2010	1	Gidhim	41	0	1	1	17	0				1	1	0	0	0	0	1	1	0	1	1	0	0	1	0	1	0	0	1
0	1830	15/11/2010	1	Gidhim	41	0	1	1	15	0				1	1	0	1	1	0	1	0	0	1	1	0	1	1	0	1	0	0	1
0	1831	15/11/2010	1	Gidhim	41	0	1	1	15	1	1	0	1	1	1	0	0	1	0	0		0	1	1	0	1	1	1	1	0	1	0
0	1832	15/11/2010	1	Gidhim	41	0	1	0	18	1	0	0	1	1	1	0	1	1	1	0		0	0			1	1	1	1	1	1	1
0	1833	15/11/2010	1	Gidhim	41	0	1	0	20	0				1	0	1	1	1	1	1	0	0	1	1	0	0	0	0	0	1	1	1
0	1834	15/11/2010	1	Gidhim	41	0	1	0	17	0				1	1	1	1	1	1	0		0	1	1	0	0	0	0	0	0	1	1
0	1835	15/11/2010	1	Gidhim	41	0	1	0	17	0				1	1	0	1	1	1	0		1	1	1	0	1	1	1	0	0	1	1
0	1836	15/11/2010	1	Gidhim	41	0	1	1	17	0				1	1	0	1	1	1	1	1	0	1	1	0	1	1	1	1	0	0	1
0	1837	15/11/2010	1	Gidhim	41	0	1	1	17	0				1	1	0	1	1	1	0		0	1	1	0	1	1	1	1	1	1	1
0	1838	15/11/2010	1	Gidhim	41	0	1	1	17	0				1	1	0	0	1	1	0		1	1	1	0	1	1	1	1	1	1	1
0	1839	15/11/2010	1	Gidhim	41	0	1	1	16	0				1	1	0	1	1	1	0		1	1	1	0	1	1	0	1	0	1	1
0	1840	15/11/2010	1	Gidhim	41	0	1	1	16	1	0	0	0	1	1	1	0	1	0	0		1	1	1	0	1	1	0	0	0	0	1
0	1841	15/11/2010	1	Gidhim	41	0	1	0	16	0				1	1	0	0	1	1	1	1	1	0			1	1	1	1	0	1	1
0	1842	15/11/2010	1	Gidhim	41	0	1	1	17	1	0	1	1	1	1	0	0	1	1	0		0	0			1	1	1	1	0	1	1
0	1843	15/11/2010	1	Gidhim	41	0	1	1	14	1	0	1	1	1	1	0	0	0	1	0		0	0			1	0	1	0	0	1	1
0	1844	15/11/2010	1	Gidhim	41	0	1	1	17	0				1	0	0	0	1	1	0		0	0			1	0	0	1	0	1	1
0	1845	15/11/2010	1	Gidhim	41	0	1	0	15	0				1	0	1	1	1	1	1	1	0	0			0	0	0	1	0	0	1
0	1846	15/11/2010	1	Gidhim	41	0	1	1	16	0				1	1	0	1	0	0	0		0	1	0	0	0	0	0	1	0	0	1
0	1847	15/11/2010	1	Gidhim	41	0	1	1	17	1	0	1	1	1	1	0	0	1	1	0		0	0			1	0	0	1	0	0	1
0	1848	15/11/2010	1	Gidhim	41	0	1	1	17	1	0	0	1	1	1	0	1	1	1	0		0	1	1	0	0	1	0	1	1	1	1
0	1849	15/11/2010	1	Gidhim	41	0	1	1	14	1	0	1	1	1	1	0	0	0	1	1	0	0	1	0	0	1	1	1	1	0	1	1
0	1850	15/11/2010	1	Gidhim	41	0	1	1	16	1	1	1	1	1	1	0	0	1	1	0		0	1	1	0	1	1	1	1	0	1	1
0	1851	15/11/2010	1	Gidhim	41	0	1	1	15	1	0	0	1	1	1	0	0	1	0	0		0	1	1	0	1	1	1	1	0	1	1
0	1852	15/11/2010	1	Gidhim	41	0	1	0	15	0				1	1	0	0	1	1	0		0	0			0	0	0	0	1	1	1
0	1853	15/11/2010	1	Gidhim	41	0	1	0	20	1	0	1	1	1	1	0	1	1	1	0		0	1	1	0	0	0	0	0	0	1	1
0	1854	15/11/2010	1	Gidhim	41	0	1	0	17	1	0	1	1	1	1	0	0	1	1	0		0	1	1	0	1	1	1	1	1	1	1
0	1855	15/11/2010	1	Gidhim	41	0	1	0	16	0				1	0	0	0	0	0	0		0	1	1	0	0	0	0	0	1	1	1
0	1856	15/11/2010	1	Gidhim	41	0	1	0	16	1	0	1	1	1	1	0	1	1	1	1	0	0	0			1	1	0	0	1	1	1
0	1857	15/11/2010	1	Gidhim	41	0	1	0	19	0				1	1	1	1	1	1	0		0	1	0	0	1	1	1	1	0	0	1
0	1858	15/11/2010	1	Gidhim	41	0	1	0	17	0				1	1	0	1	1	1	0		0	1	1	0	1	1	0	0	0	1	1
0	1859	15/11/2010	1	Gidhim	41	0	1	0	17	0				1	1	1	1	1	1	1	0	0	1	1	0	0	1	1	0	1	1	1
0	1860	15/11/2010	1	Gidhim	41	0	1	1	15	0				1	1	0	0	0	0	0		0	1	1	0	0	1	0	0	0	1	1
0	1861	15/11/2010	1	Gidhim	41	0	1	0	16	1	1	1	1	1	1	0	1	1	0	1	1	0	1	1	0	1	1	0	1	1	1	0
0	1862	15/11/2010	1	Gidhim	41	0	1	0	17	1	0	1	0	1	1	0	1	1	0	0		0	1	1	0	1	1	1	1	0	1	0
0	1863	15/11/2010	1	Gidhim	41	0	1	0	20	0				1	0	0	0	1	1	0		0	1	1	0	0	1	0	1	1	1	1
0	1864	15/11/2010	1	Gidhim	41	0	1	0	16	1	1	0	1	1	1	0	1	1	0	0		0	1	1	0	1	1	1	0	1	1	1
0	1865	15/11/2010	1	Gidhim	41	0	1	0	21	0				1	1	1	0	0	1	0		1	1	1	0	1	1	1	1	1	1	1
0	1866	15/11/2010	1	Gidhim	41	0	1	1	18	0				1	1	0	1	1	1	0		0	0			0	1	0	1	0	1	1
0	1867	15/11/2010	1	Gidhim	41	0	1	1	15	0				1	1	0	1	1	1	0		0	1	0	0	1	1	0	1	0	1	1
0	1868	15/11/2010	1	Gidhim	41	0	1	1	15	1	0	0	1	1	1	0	1	1	1	0		0	1	0	0	0	1	0	1	0	1	1
0	1869	15/11/2010	1	Gidhim	41	0	1	1	17	1	0	1	1	1	1	0	1	1	1	0		0	0			1	1	1	1	0	1	1
0	1870	15/11/2010	1	Gidhim	41	0	1	1	15	0				1	1	0	1	1	1	0		1	1	1	0	1	0	0	1	1	1	1
0	1238	18/11/2010	1	Haydarer	42	1	1	1	16	1	0	1	1	1	1	0	1	1	1	0		0	1	1	0	1	1	1	1	0	1	1
0	1239	18/11/2010	1	Haydarer	42	1	1	1	18	0				1	1	0	1	1	1	0		0	1	1	0	1	1	1	0	0	1	1
0	1240	18/11/2010	1	Haydarer	42	1	1	0	17	1	0	1	1	1	1	0	1	1	1	1	1	0	1	1	0	1	1	1	1	1	1	1
0	1241	18/11/2010	1	Haydarer	42	1	1	1	16	1	0	0	1	1	1	0	0	1	1	0		0	1	1	0	1	0	0	0	0	1	1
0	1242	18/11/2010	1	Haydarer	42	1	1	1	16	1	0	1	1	1	1	0	1	0	1	0		0	1	1	0	1	1	1	0	0	1	1
0	1243	18/11/2010	1	Haydarer	42	1	1	1	17	0				1	1	0	1	1	1	0		0	1	1	0	1	1	1	0	0	0	1
0	1244	18/11/2010	1	Haydarer	42	1	1	0	18	1	1	1	1	1	1	1	1	1	1	1	0	0	1	1	0	1	1	1	0	0	1	1
0	1245	18/11/2010	1	Haydarer	42	1	1	0	16	1	1	1	1	1	1	0	1	1	1	0		0	1	1	0	0	0	0	0	1	0	1
0	1246	18/11/2010	1	Haydarer	42	1	1	0	16	1	1	0	1	1	1	0	1	1	1	0		0	1	1	0	1	0	0	0	0	0	1
0	1247	18/11/2010	1	Haydarer	42	1	1	0	16	1	0	0	1	1	1	0	1	1	1	0		0	1	1	0	1	1	1	1	0	1	1
0	1248	18/11/2010	1	Haydarer	42	1	1	0	17	1	1	1	1	1	1	1	0	1	1	1	0	0	1	1	0	1	1	0	0	0	1	1
0	1249	18/11/2010	1	Haydarer	42	1	1	0	17	1	0	1	1	1	1	0	0	1	0	1	0	0	1	1	0	1	0	1	1	1	0	0
0	1250	18/11/2010	1	Haydarer	42	1	1	1	16	1	0	1	0	1	1	0	1	1	1	1	0	0	1	1	0	1	1	1	1	1	1	1
0	1251	18/11/2010	1	Haydarer	42	1	1	1	17	1	1	1	1	1	1	0	1	1	1	1	0	0	1	1	0	1	1	1	1	1	1	1
0	1252	18/11/2010	1	Haydarer	42	1	1	0	16	1	1	1	1	1	1	0	1	1	1	1	0	0	1	1	0	1	1	1	1	0	0	1
0	1253	18/11/2010	1	Haydarer	42	1	1	0	19	1	0	0	1	1	1	0	1	1	1	1	0	0	1	1	0	1	1	1	1	1	1	1
0	1254	18/11/2010	1	Haydarer	42	1	1	0	19	1	0	0	1	1	1	0	0	1	1	1	0	0	1	1	0	1	1	1	1	0	1	1
0	1255	18/11/2010	1	Haydarer	42	1	1	1	18	0				0									1	1	0	1	1	1	1	1	1	1
0	1256	18/11/2010	1	Haydarer	42	1	1	1	17	0				1	1	0	1	1	1	0		0	1	1	0	0	1	0	1	1	1	1
0	1257	18/11/2010	1	Haydarer	42	1	1	1	17	0	0	1	1	0									1	1	0	0	0	1	0	1	1	1
0	1258	18/11/2010	1	Haydarer	42	1	1	0	18	1	1	1	1	1	1	0	1	1	1	1	0	0	1	1	0	0	1	1	0	0	1	1
0	1259	18/11/2010	1	Haydarer	42	1	1	0	16	1	0	0	1	1	1	0	0	1	1	1	0	0	1	1	0	1	1	1	1	1	1	1
0	1260	18/11/2010	1	Haydarer	42	1	1	0	18	1	1	1	1	1	1	0	1	1	1	0		0	1	1	0	0	0	0	0	0	1	1
0	1261	18/11/2010	1	Haydarer	42	1	1	0	17	1	1	1	1	1	1	0	1	1	1	1	0	0	1	1	0	1	1	1	1	1	1	1
0	1262	18/11/2010	1	Haydarer	42	1	1	1	19	0				1	1	0	1	1	1	0		0	1	1	0	1	1	0	0	1	0	1
0	1263	18/11/2010	1	Haydarer	42	1	1	1	18	1	1	1	1	1	1	0	1	1	1	1	0	0	1	1	0	1	1	1	1	1	1	1
0	1264	18/11/2010	1	Haydarer	42	1	1	1	15	0				1	1	0	1	1	1	0		0	1	1	0	1	1	1	1	1	0	1
0	1265	18/11/2010	1	Haydarer	42	1	1	1	15	1	1	0	1	1	0	1	1	0	0	0		0	0			1	1	1	1	1	0	0
0	1266	18/11/2010	1	Haydarer	42	1	1	1	16	0				1	1	0	1	1	1	0		0	1	1	0	1	1	0	1	0	1	1
0	1267	18/11/2010	1	Haydarer	42	1	1	1	19	0				1	1	0	1	1	1	0		0	1	1	0	1	1	1	0	0	1	1
0	1268	18/11/2010	1	Haydarer	42	1	1	1	16	1	0	0	1	1	1	0	0	1	1	1	0	0	1	1	0	1	1	0	0	1	1	1
0	1269	18/11/2010	1	Haydarer	42	1	1	1	16	0				1	1	1	1	1	1	1	1	0	1	1	0	1	1	0	1	0	1	1
0	1270	18/11/2010	1	Haydarer	42	1	1	1	17	1	0	1	1	1	1	0	1	1	1	1	0	0	1	1	0	1	1	1	1	0	1	1
0	1271	18/11/2010	1	Haydarer	42	1	1	1	15	1	0	1	1	1	1	0	1	1	1	0		0	1	1	0	1	1	1	1	0	1	1
0	1317	18/11/2010	1	Haydom	43	1	1	1	15	0				1	1	1	0	1	1	0		0	1	1	0	1	1	1	0	1	1	1
0	1318	18/11/2010	1	Haydom	43	1	1	0	17	0				0									1	1	0	1	1	1	1	1	1	1
0	1319	18/11/2010	1	Haydom	43	1	1	0	20	1	1	1	1	1	1	0	1	1	1	0		0	1	1	0	1	1	1	1	0	0	0
0	1320	18/11/2010	1	Haydom	43	1	1	1	16	1	0	1	1	1	1	0	0	1	0	0		1	1	1	0	1	1	1	1	1	1	1
0	1321	18/11/2010	1	Haydom	43	1	1	0	16	1	1	1	1	1	1	1	1	1	1	1	0	0	1	1	0	1	1	1	0	1	1	0
0	1322	18/11/2010	1	Haydom	43	1	1	1	18	0				1	1	0	1	1	1	1	0	0	1	1	0	1	1	1	0	1	0	1
0	1323	18/11/2010	1	Haydom	43	1	1	1	16	0				1	1	1	1	1	0	0		0	1	1	0	0	1	0	1	1	0	0
0	1324	18/11/2010	1	Haydom	43	1	1	1	16	0				1	1	0	1	1	1	0		0	1	1	0	1	1	1	0	1	1	1
0	1325	18/11/2010	1	Haydom	43	1	1	0	20	1	0	1	1	1	1	0	1	1	1	1	0	0	1	1	0	1	1	1	1	1	1	1
0	1326	18/11/2010	1	Haydom	43	1	1	0	17	1	0	1	1	1	1	0	1	1	1	0		0	1	0	0	0	1	1	1	1	1	1
0	1327	18/11/2010	1	Haydom	43	1	1	1	18	0				1	1	0	1	1	1	1	0	0	1	1	0	1	1	1	0	1	1	1
0	1328	18/11/2010	1	Haydom	43	1	1	1	18	0				1	1	0	1	1	1	0		0	1	1	0	1	1	1	0	1	1	1
0	1329	18/11/2010	1	Haydom	43	1	1	1	16	0				1	1	0	1	0	1	0		0	1	1	0	1	1	1	0	1	1	1
0	1330	18/11/2010	1	Haydom	43	1	1	0	17	0				1	1	0	0	1	1	1	0	0	1	1	0	1	0	0	1	0	1	1
0	1331	18/11/2010	1	Haydom	43	1	1	1	15	1	0	1	1	1	1	0	0	1	0	0		0	1	1	0	0	0	0	1	1	1	1
0	1332	18/11/2010	1	Haydom	43	1	1	1	18	1	1	0	1	1	1	0	1	1	1	1	0	0	1	1	0	1	1	1	0	1	1	0
0	1333	18/11/2010	1	Haydom	43	1	1	1	15	1	0	1	1	1	1	0	1	1	1	0		0	1	1	0	1	1	1	1	1	1	1
0	1334	18/11/2010	1	Haydom	43	1	1	1	15	1	0	1	1	1	1	0	0	1	1	0		0	1	1	0	1	1	1	1	0	1	1
0	1335	18/11/2010	1	Haydom	43	1	1	0	16	1	1	1	1	1	1	0	1	1	1	0		1	1	1	0	1	1	1	1	1	0	1
0	1336	18/11/2010	1	Haydom	43	1	1	1	17	1	0	1	1	1	0	1	0	1	0	1	0	0	1	1	0	1	1	1	0	1	1	1
0	1337	18/11/2010	1	Haydom	43	1	1	1	16	1	0	1	1	1	1	1	1	1	1	1	0	0	1	1	0	1	1	1	1	1	1	1
0	1338	18/11/2010	1	Haydom	43	1	1	1	15	1	0	1	1	1	1	0	1	1	1	0		0	1	1	0	1	1	1	0	1	1	1
0	1339	18/11/2010	1	Haydom	43	1	1	0	16	1	0	1	1	1	1	1	1	1	1	1	0	0	1	1	0	1	1	1	0	1	1	1
0	1340	18/11/2010	1	Haydom	43	1	1	0	18	1	0	0	1	1	1	1	0	1	1	0		0	1	1	0	0	0	0	1	1	1	1
0	1341	18/11/2010	1	Haydom	43	1	1	0	17	1	0	1	1	1	1	0	1	1	1	0		0	1	1	0	1	1	1	0	1	0	1
0	1342	18/11/2010	1	Haydom	43	1	1	0	20	1	0	1	1	1	0	1	1	1	1	0		0	1	0	0	1	1	1	1	1	1	1
0	1343	18/11/2010	1	Haydom	43	1	1	1	15	0				1	1	0	1	1	1	0		0	1	1	0	1	1	1	0	1	1	1
0	1344	18/11/2010	1	Haydom	43	1	1	0	16	0				1	1	1	0	1	1	1	0	0	1	1	0	1	1	0	1	1	1	1
0	1345	18/11/2010	1	Haydom	43	1	1	1	18	0				1	1	0	1	1	0	0		1	1	1	0	1	1	1	1	1	1	0
0	1346	18/11/2010	1	Haydom	43	1	1	1	16	1	0	1	1	1	1	0	1	1	1	0		0	1	1	0	1	1	1	1	1	1	1
0	1347	18/11/2010	1	Haydom	43	1	1	0	15	0				1	1	0	1	1	1	0		0	1	1	0	0	0	0	1	1	1	1
0	1348	18/11/2010	1	Haydom	43	1	1	1	17	1	1	1	1	1	1	1	1	1	1	0		1	1	1	0	0	1	1	1	1	1	1
0	1349	18/11/2010	1	Haydom	43	1	1	0	18	1	0	1	1	1	1	0	1	1	1	1	0	0	1	1	0	1	1	1	1	0	1	1
0	1350	18/11/2010	1	Haydom	43	1	1	0	16	0				1	1	1	1	1	1	0		1	1	1	0	0	1	0	0	1	1	1
0	1351	18/11/2010	1	Haydom	43	1	1	0	17	1	1	1	1	1	0	1	1	1	1	0		0	1	1	0	1	1	1	1	1	0	1
0	1352	18/11/2010	1	Haydom	43	1	1	1	14	1	0	1	1	1	1	1	1	1	1	0		0	1	1	0	1	1	1	1	1	1	1
0	1353	18/11/2010	1	Haydom	43	1	1	1	15	1	0	0	1	1	1	1	1	1	1	0		0	1	1	0	1	1	1	1	1	1	1
0	1354	18/11/2010	1	Haydom	43	1	1	0	18	1	1	1	1	1	1	0	1	1	1	1	0	0	1	1	0	1	1	1	1	1	0	1
0	1355	18/11/2010	1	Haydom	43	1	1	1	16	0				1	1	0	1	1	1	0		1	1	1	0	1	1	1	0	0	1	1
0	1356	18/11/2010	1	Haydom	43	1	1	0	14	1	0	1	1	1	1	0	1	1	1	1	0	0	1	1	0	1	1	1	1	1	0	1
0	1357	18/11/2010	1	Haydom	43	1	1	1	15	1	0	1	1	1	1	0	0	1	1	0		0	1	1	0	1	1	0	1	1	1	0
0	1358	18/11/2010	1	Haydom	43	1	1	0	15	1	1	1	1	1	1	0	1	1	1	0		0	1	1	0	1	1	1	1	1	0	1
0	1359	18/11/2010	1	Haydom	43	1	1	0	16	1	1	1	1	1	1	0	1	1	1	0		0	1	1	0	1	1	1	1	1	0	1
0	1360	18/11/2010	1	J_Kikwete	44	0	1	1	16	1	0	1	1	1	0	1	1	1	1	0		0	1	1	0	0	1	0	1	1	1	1
0	1361	18/11/2010	1	J_Kikwete	44	0	1	1	14	0				1	1	1	1	1	0	1	0	0	1	1	0	1	1	1	1	1	1	1
0	1362	18/11/2010	1	J_Kikwete	44	0	1	0	15	0				1	1	1	1	1	1	0		0	1	1	0	1	1	1	1	1	1	1
0	1363	18/11/2010	1	J_Kikwete	44	0	1	1	16	0				1	1	0	0	1	1	0		0	0			0	1	0	0	1	1	0
0	1364	18/11/2010	1	J_Kikwete	44	0	1	1	14	1	0	0	1	1	1	1	1	1	1	0		0	1	1	0	1	1	1	1	1	1	0
0	1365	18/11/2010	1	J_Kikwete	44	0	1	1	17	1	1	0	1	1	0	1	1	1	1	1	0	1	1	1	0	1	1	0	1	0	0	1
0	1366	18/11/2010	1	J_Kikwete	44	0	1	1	17	0				0									1	1	0	0	1	1	1	0	0	0
0	1367	18/11/2010	1	J_Kikwete	44	0	1	0	18	0				1	1	0	1	1	1	0		0	1	0	0	1	1	1	1	0	0	1
0	1368	18/11/2010	1	J_Kikwete	44	0	1	0	15	1	1	0	1	1	1	1	1	1	1	0		0	1	1	0	1	1	1	0	1	1	0
0	1369	18/11/2010	1	J_Kikwete	44	0	1	0	18	1	0	1	0	1	1	0	1	1	1	1	1	0	1	1	0	1	1	1	1	1	1	1
0	1370	18/11/2010	1	J_Kikwete	44	0	1	0	16	0				1	1	1	1	1	1	1	0	0	1	1	0	1	1	1	1	0	1	1
0	1371	18/11/2010	1	J_Kikwete	44	0	1	0	16	1	1	1	1	1	1	0	1	1	1	1	0	0	1	1	0	1	1	1	0	1	1	1
0	1372	18/11/2010	1	J_Kikwete	44	0	1	0	18	0				1	0	1	1	1	1	0		0	1	1	0	1	1	1	1	1	1	1
0	1373	18/11/2010	1	J_Kikwete	44	0	1	1	15	0				1	1	1	0	1	0	1	1	0	1	0	0	1	1	1	1	1	0	1
0	1374	18/11/2010	1	J_Kikwete	44	0	1	0	16	0				1	1	0	1	1	1	0		0	1	1	0	1	1	1	0	0	1	1
0	1375	18/11/2010	1	J_Kikwete	44	0	1	0	15	1	1	1	1	1	1	0	1	1	1	1	0	0	1	0	0	1	1	1	0	0	1	1
0	1376	18/11/2010	1	J_Kikwete	44	0	1	0	15	0				1	1	0	1	1	1	1	1	0	1	1	0	1	1	1	0	1	1	1
0	1378	18/11/2010	1	J_Kikwete	44	0	1	0	16	0				1	1	1	1	1	1	0		0	0			1	1	0	1	1	1	1
0	1379	18/11/2010	1	J_Kikwete	44	0	1	0	16	1	0	1	1	1	1	1	1	1	1	0		0	1	1	0	1	1	1	1	1	1	1
0	1380	18/11/2010	1	J_Kikwete	44	0	1	0	15	0				1	1	1	1	1	0	0		1	1	0	0	1	1	1	1	1	1	1
0	1381	18/11/2010	1	J_Kikwete	44	0	1	0	19	1	1	0	1	1	1	0	1	1	1	0		0	1	1	0	1	1	1	0	1	1	1
0	1382	18/11/2010	1	J_Kikwete	44	0	1	1	16	1	0	0	1	1	1	0	0	1	0	0		0	1	0	0	1	1	1	0	1	0	1
0	1383	18/11/2010	1	J_Kikwete	44	0	1	1	16	1	1	0	1	1	1	0	0	1	1	0		0	1	1	0	0	1	1	1	1	0	1
0	1384	18/11/2010	1	J_Kikwete	44	0	1	1	14	1	0	0	1	1	1	1	0	1	1	1	0	0	1	1	0	0	1	0	1	1	1	1
0	1385	18/11/2010	1	J_Kikwete	44	0	1	1	17	1	0	0	1	1	1	1	1	1	1	0		0	1	1	0	1	1	1	1	1	1	1
0	1386	18/11/2010	1	J_Kikwete	44	0	1	1	17	1	0	1	1	1	1	1	1	1	0	0		0	1	1	0	1	1	0	1	1	1	1
0	1387	18/11/2010	1	J_Kikwete	44	0	1	1	16	0				1	1	0	1	1	1	0		0	1	1	0	1	0	0	1	1	1	1
0	1388	18/11/2010	1	J_Kikwete	44	0	1	1	16	0				1	1	0	1	1	1	0		0	1	1	0	1	1	1	1	0	1	1
0	1389	18/11/2010	1	J_Kikwete	44	0	1	1	15	1	0	1	1	1	1	1	0	0	0	0		0	1	0	0	0	1	0	1	0	1	0
0	1390	18/11/2010	1	J_Kikwete	44	0	1	0	18	1	0	0	1	1	1	1	1	1	1	1	0	0	1	1	0	1	1	1	1	0	1	1
0	1391	18/11/2010	1	J_Kikwete	44	0	1	0	19	1	1	0	1	1	1	1	1	1	1	1	0	0	1	1	0	1	1	1	1	0	1	1
0	1392	18/11/2010	1	J_Kikwete	44	0	1	0	18	1	0	0	1	1	1	1	1	1	1	1	0	0	1	1	0	1	1	0	1	0	1	0
0	1393	18/11/2010	1	J_Kikwete	44	0	1	1	17	0				1	1	1	1	1	1	1	0	0	1	1	0	1	1	1	0	0	0	0
0	1394	18/11/2010	1	J_Kikwete	44	0	1	1	18	0				1	1	1	1	0	1	0		0	1	1	0	1	1	1	0	1	1	1
0	1395	18/11/2010	1	J_Kikwete	44	0	1	1	16	1	0	0	1	1	1	0	1	1	0	0		0	1	0	0	1	1	1	0	0	1	0
0	1396	18/11/2010	1	J_Kikwete	44	0	1	1	19	0				1	1	1	1	1	1	0		0	1	1	0	0	1	1	0	1	0	0
0	1397	18/11/2010	1	J_Kikwete	44	0	1	1	16	1	0	1	1	1	1	1	1	1	1	0		1	1	0	0	1	0	0	1	0	0	1
0	1398	18/11/2010	1	J_Kikwete	44	0	1	1	15	1	1	0	1	0									1	0	0	0	0	0	1	0	0	1
0	1399	18/11/2010	1	J_Kikwete	44	0	1	1	15	0				1	1	1	0	1	0	0		0	1	1	0	0	1	0	1	0	1	1
0	1400	18/11/2010	1	J_Kikwete	44	0	1	1	15	0				1	1	1	0	1	0	0		0	1	1	0	1	1	0	1	0	1	1
0	1401	18/11/2010	1	J_Kikwete	44	0	1	1	18	1	0	1	1	1	1	0	1	1	1	0		0	1	1	0	1	1	0	1	1	0	0
0	1402	18/11/2010	1	J_Kikwete	44	0	1	1	17	0				1	1	0	1	1	1	1	1	0	1	1	0	1	1	1	1	1	1	0
0	1403	18/11/2010	1	J_Kikwete	44	0	1	1	16	1	1	1	1	1	1	1	1	1	1	1	1	0	1	0	0	1	1	1	1	0	1	1
0	1404	18/11/2010	1	J_Kikwete	44	0	1	1	16	0				1	1	0	0	1	0	0		0	1	1	0	0	1	0	1	1	1	1
0	2090	9/11/2010	1	Kainam	45	1	1	0	19	1	0	1	1	1	1	0	1	1	1	1	0	0	1	1	0	1	1	0	1	0	1	0
0	2091	9/11/2010	1	Kainam	45	1	1	0	17	1	0	0	1	1	1	1	1	1	1	0		0	1	1	0	1	0	0	0	0	0	1
0	2092	9/11/2010	1	Kainam	45	1	1	1	18	1	1	1	1	1	1	1	1	1	1	1		0	0			1	1	1	0	1	1	1
0	2093	9/11/2010	1	Kainam	45	1	1	0	20	1	1	1	1	1	1	1	1	1	1	1	0	0	0			1	1	0	1	0	0	1
0	2094	9/11/2010	1	Kainam	45	1	1	0	20	1	0	1	1	1	0	0	1	1	1	1	0	0	1	1	0	1	1	1	1	1	1	1
0	2095	9/11/2010	1	Kainam	45	1	1	0	18	1	0	0	1	1	1	0	1	1	1	1	0	0	1	1	0	0	1	0	1	1	1	1
0	2096	9/11/2010	1	Kainam	45	1	1	1	14	1	1	0	1	1	1	0	1	1	1	0		0	1	1	0	1	1	1	1	1	1	1
0	2097	9/11/2010	1	Kainam	45	1	1	1	18	0				1	0	1	1	1	1	0		0	1	1	0	1	1	0	0	1	0	1
0	2098	9/11/2010	1	Kainam	45	1	1	0	17	1	0	0	1	1	1	0	1	1	1	0		0	1	1	0	1	1	1	0	0	0	1
0	2099	9/11/2010	1	Kainam	45	1	1	0	17	1	0	1	1	0									1	1	0	1	1	1	0	0	1	1
0	2100	9/11/2010	1	Kainam	45	1	1	1	19	1	0	0	0	1	1	0	0	1	1	1	0	0	1	1	0	1	1	1	1	1	1	1
0	2101	9/11/2010	1	Kainam	45	1	1	1	15	1	0	0	1	1	1	0	1	1	1	0		0	1	1	0	1	1	1	1	0	1	0
0	2102	9/11/2010	1	Kainam	45	1	1	1	15	1	0	1	1	1	1	0	1	1	1	0		0	1	1	0	1	1	1	1	1	1	0
0	2103	9/11/2010	1	Kainam	45	1	1	1	17	0				1	1	0	1	0	1	0		0	1	1	0	1	1	1	1	1	1	1
0	2104	9/11/2010	1	Kainam	45	1	1	1	15	1	1	1	1	1	1	0	1	1	1	0		0	1	1	0	1	1	1	1	0	1	1
0	2105	9/11/2010	1	Kainam	45	1	1	0	16	1	0	0	1	1	1	1	1	1	1	1	0	0	1	1	0	1	1	1	1	1	1	1
0	2106	9/11/2010	1	Kainam	45	1	1	0	16	1	1	1	1	1	1	0	1	1	1	0		0	1	1	0	1	1	1	1	1	1	1
0	2107	9/11/2010	1	Kainam	45	1	1	1	17	0				1	1	0	1	1	1	0		0	0			1	1	0	1	0	1	1
0	2108	9/11/2010	1	Kainam	45	1	1	0	17	0				1	1	1	1	1	1	0		0	0			1	1	0	0	1	0	1
0	2109	9/11/2010	1	Kainam	45	1	1	0	16	0				0									0			1	1	0	0	0	1	1
0	2110	9/11/2010	1	Kainam	45	1	1	0	15	1	0	0	1	1	1	0	0	1	0	0		0	0			1	1	0	0	0	0	0
0	2111	9/11/2010	1	Kainam	45	1	1	0	15	1	0	1	1	1	1	0	1	1	1	0		1	1	1	0	1	1	1	1	1	1	0
0	2112	9/11/2010	1	Kainam	45	1	1	1	17	1	0	1	1	1	1	0	1	0	1	0		0	0			0	0	0	0	0	1	1
0	2113	9/11/2010	1	Kainam	45	1	1	1	15	1	1	1	1	1	1	0	1	1	1	0		0	1	1	0	1	1	1	1	1	1	1
0	2114	9/11/2010	1	Kainam	45	1	1	0	14	1	0	1	1	1	1	1	1	1	1	1	0	0	1	1	0	1	1	1	0	0	1	1
0	2115	9/11/2010	1	Kainam	45	1	1	0	15	1	1	0	1	1	1	0	1	1	1	0		0	1	1	0	1	1	1	1	1	1	1
0	2116	9/11/2010	1	Kainam	45	1	1	0	15	1	1	0	1	1	0	1	1	1	1	0		0	1	1	0	1	1	1	1	1	1	1
0	2117	9/11/2010	1	Kainam	45	1	1	1	14	1	1	1	1	1	1	0	1	1	1	1	0	0	1	1	0	1	1	1	0	0	1	1
0	2118	9/11/2010	1	Kainam	45	1	1	1	16	1	1	1	1	1	1	0	1	0	1	1	0	0	1	0	0	1	1	1	1	1	0	1
0	2119	9/11/2010	1	Kainam	45	1	1	0	15	1	0	0	1	1	1	1	1	1	1	0		0	1	0	0	1	1	1	0	1	0	0
0	2120	9/11/2010	1	Kainam	45	1	1	1	15	1	0	1	1	1	1	0	0	1	1	0		0	1	1	0	1	1	1	1	1	1	1
0	2121	9/11/2010	1	Kainam	45	1	1	1	15	1	0	0	1	1	1	0	1	1	1	0		0	1	1	0	1	1	1	0	0	1	1
0	2122	9/11/2010	1	Kainam	45	1	1	0	16	1	1	0	1	1	1	0	1	0	1	0		0	1	0	0	0	1	0	0	1	1	1
0	2123	9/11/2010	1	Kainam	45	1	1	0	18	1	1	0	0	1	1	0	1	1	1	0		0	1	0	0	0	1	0	0	0	1	1
0	2124	9/11/2010	1	Kainam	45	1	1	1	16	1	0	0	1	1	1	0	1	1	1	0		0	1	1	0	1	1	1	1	1	0	1
0	2125	9/11/2010	1	Kainam	45	1	1	0	17	1	0	1	1	1	1	0	1	1	0	0		0	1	1	0	1	1	1	1	1	1	0
0	2126	9/11/2010	1	Kainam	45	1	1	0	18	1	1	1	1	1	1	1	1	1	1	0		1	1	1	0	1	1	0	0	1	0	1
0	2127	9/11/2010	1	Kainam	45	1	1	0	18	1	0	0	1	1	1	0	0	1	1	0		1	1	1	0	0	1	1	0	1	1	1
0	2128	9/11/2010	1	Kainam	45	1	1	0	14	1	0	1	1	1	0	1	1	1	1	0		0	0			0	1	0	1	1	1	1
0	2129	9/11/2010	1	Kainam	45	1	1	0	15	1	1	1	1	1	1	0	1	1	1	0		0	0			1	1	0	0	0	1	1
0	2130	9/11/2010	1	Kainam	45	1	1	0	18	1	0	1	1	1	1	1	1	1	0	0		0	0			1	1	1	1	0	1	1
0	2131	9/11/2010	1	Kainam	45	1	1	0	15	0				1	0	1	1	0	1	0		0	0			0	0	0	0	0	0	1
0	2132	9/11/2010	1	Kainam	45	1	1	0	15	1	1	1	1	1	1	1	1	1	1	1	0	0	1	1	0	1	1	1	1	0	0	1
0	2133	9/11/2010	1	Kainam	45	1	1	1	15	1	1	0	1	1	1	1	1	1	1	0		0	1	0	0	1	1	1	0	1	0	1
0	2134	9/11/2010	1	Kainam	45	1	1	1	15	1	0	1	1	1	1	1	1	1	1	1	0	0	1	1	0	1	1	1	1	0	1	1
0	2220	17/11/2010	1	Maghang	46	0	1	1	16	1	0	0	1	1	0	1	0	1	0	1	0	0	1	1	0	0	1	0	0	1	1	1
0	2221	17/11/2010	1	Maghang	46	0	1	1	17	1	0	1	1	1	1	0	1	1	1	0		0	1	1	0	1	0	1	1	1	1	1
0	2222	17/11/2010	1	Maghang	46	0	1	1	18	0				1	1	0	1	1	0	0		0	0			0	1	1	1	1	0	1
0	2223	17/11/2010	1	Maghang	46	0	1	1	16	1	0	0	1	1	1	0	0	1	1	1	1	0	1	1	0	0	0	0	1	0	1	1
0	2224	17/11/2010	1	Maghang	46	0	1	1	15	1	0	1	1	1	0	0	0	1	0	1	0	0	1	1	0	0	1	0	0	0	1	1
0	2225	17/11/2010	1	Maghang	46	0	1	1	18	1	0	1	1	1	1	1	1	1	1	1	0	0	1	1	0	1	1	1	1	0	1	1
0	2226	17/11/2010	1	Maghang	46	0	1	1	16	1	0	0	1	1	1	0	0	1	1	0		0	1	1	0	1	1	1	1	1	0	1
0	2227	17/11/2010	1	Maghang	46	0	1	1	16	1	1	1	1	1	1	0	1	1	0	0		0	0			1	1	1	1	0	0	0
0	2228	17/11/2010	1	Maghang	46	0	1	0	15	0				1	1	0	1	1	1	0		0	1	1	0	1	1	0	1	1	1	1
0	2229	17/11/2010	1	Maghang	46	0	1	1	15	1	0	0	1	0									1	1	0	0	1	1	0	0	1	1
0	2230	17/11/2010	1	Maghang	46	0	1	0	19	0				1	1	0	1	1	1	0		1	0			0	0	0	0	0	0	1
0	2231	17/11/2010	1	Maghang	46	0	1	1	18	0				1	1	0	1	1	1	0		0	1	0	0	1	1	0	0	0	0	1
0	2232	17/11/2010	1	Maghang	46	0	1	1	18	0				1	1	0	1	1	1	1	0	0	1	1	0	1	1	1	1	0	1	1
0	2233	17/11/2010	1	Maghang	46	0	1	0	17	1	0	1	1	1	1	0	1	1	1	1	0	0	1	1	0	1	1	0	1	1	1	1
0	2234	17/11/2010	1	Maghang	46	0	1	0	16	1	0	0	1	1	1	0	1	1	1	0		0	1	1	0	0	1	0	1	1	1	1
0	2235	17/11/2010	1	Maghang	46	0	1	0	15	1	1	1	1	1	1	0	0
0	2236	17/11/2010	1	Maghang	46	0	1	1	16	0				1	0	1	1	1	1	0		0	1	1	0	0	1	1	1	1	1	1
0	2237	17/11/2010	1	Maghang	46	0	1	1	16	1	0	1	1	1	0	0	1	1	1	1	1	0	1	1	0	1	1	1	1	1	1	1
0	2238	17/11/2010	1	Maghang	46	0	1	0	17	1	0	1	1	0									0			1	0	0	0	0	1	1
0	2239	17/11/2010	1	Maghang	46	0	1	0	18	1	0	1	1	1	1	0	1	1	1	1	0	0	1	1	0	1	1	1	1	1	1	1
0	2240	17/11/2010	1	Maghang	46	0	1	1	18	1	0	0	1	1	1	0	1	1	1	1	0	0	1	0	0	1	1	1	1	0	1	1
0	2241	17/11/2010	1	Maghang	46	0	1	0	18	1	0	0	1	1	1	0	1	1	1	1	0	0	1	1	0	1	1	1	1	1	0	1
0	2242	17/11/2010	1	Maghang	46	0	1	0	18	1	1	0	1	1	1	0	1	1	1	1	0	0	1	1	0	1	1	1	1	1	1	1
0	2243	17/11/2010	1	Maghang	46	0	1	1	14	1	1	1	1	1	1	0	1	1	1	1	0	0	1	1	0	1	1	1	1	1	1	1
0	2244	17/11/2010	1	Maghang	46	0	1	0	17	1	0	1	1	1	1	1	1	1	0	0		0	0			1	1	1	1	1	1	1
0	2245	17/11/2010	1	Maghang	46	0	1	0	16	1	0	1	1	1	1	1	0	1	0	0		0	0			0	1	0	0	1	1	1
0	2246	17/11/2010	1	Maghang	46	0	1	0	17	1	0	1	1	1	1	0	1	1	1	0		0	1	0	0	1	1	1	0	0	1	0
0	2247	17/11/2010	1	Maghang	46	0	1	0	15	1	0	1	1	0									0			0	1	0	1	0	0	1
0	2248	17/11/2010	1	Maghang	46	0	1	0	18	1	0	0	1	1	1	1	1	1	1	1	0	0	1	1	0	1	1	1	0	1	1	1
0	2249	17/11/2010	1	Maghang	46	0	1	0	18	1	1	1	1	1	1	0	1	1	1	0		0	1	1	0	1	1	1	1	1	1	1
0	2250	17/11/2010	1	Maghang	46	0	1	0	20	1	0	1	1	1	1	0	1	1	1	1	0	0	1	0	0	1	1	1	1	1	1	1
0	2251	17/11/2010	1	Maghang	46	0	1	0	17	1	0	1	1	1	1	1	0	1	1	0		0	1	0	0	0	1	1	1	0	1	1
0	2252	17/11/2010	1	Maghang	46	0	1	0	17	0				1	1	1	0	1	1	0	0	0	1	1	0	1	1	1	1	0	1	1
0	2253	17/11/2010	1	Maghang	46	0	1	1	14	1	0	1	1	1	1	0	0	1	0	0		0	0			1	1	1	1	1	1	0
0	2254	17/11/2010	1	Maghang	46	0	1	1	15	1	1	0	1	1	1	0	0	1	0	1	0	0	1	1	0	0	1	1	1	1	1	0
0	2255	17/11/2010	1	Maghang	46	0	1	0	20	0				1	1	1	0	1	1	0		1	1	0	0	1	1	1	0	1	1	1
0	2256	17/11/2010	1	Maghang	46	0	1	1	17	1	1	1	1	1	1	0	1	1	1	0		0	1	1	0	1	1	1	1	0	0	1
0	2257	17/11/2010	1	Maghang	46	0	1	1	16	0				1	1	0	0	1	0	0		0	1	1	0	0	1	1	0	0	1	1
0	2258	17/11/2010	1	Maghang	46	0	1	1	17	1	0	0	1	1	1	0	1	1	1	0		0	1	1	0	1	1	1	0	0	1	1
0	2259	17/11/2010	1	Maghang	46	0	1	1	15	0				0									0			0	1	0	1	0	1	1
0	2260	17/11/2010	1	Maghang	46	0	1	1	18	1	1	1	1	1	1	0	1	1	1	0		0	1	1	0	1	1	1	1	1	1	1
0	1957	16/11/2010	1	Mare_Juu_Secondary	47	0	1	0	17	0				1	1	0	1	1	1	0		0	1	1	0	0	0	0	1	1	1	1
0	1958	16/11/2010	1	Mare_Juu_Secondary	47	0	1	0	15	0				1	1	0	1	1	1	0		1	1	1	0	0	1	0	0	0	1	1
0	1959	16/11/2010	1	Mare_Juu_Secondary	47	0	1	0	16	1	0	1	0	1	1	0	0	1	0	0		0	1	1	0	1	1	1	0	1	1	1
0	1960	16/11/2010	1	Mare_Juu_Secondary	47	0	1	1	18	0				1	0	1	1	1	0	0		0	1	1	0	0	0	0	0	0	1	1
0	1961	16/11/2010	1	Mare_Juu_Secondary	47	0	1	0	17	0				1	0	0	0	1	1	0		0	1	1	0	0	0	0	1	0	0	1
0	1962	16/11/2010	1	Mare_Juu_Secondary	47	0	1	0	15	0				1	1	0	1	1	0	0		0	1	0	0	1	1	0	1	1	0	1
0	1963	16/11/2010	1	Mare_Juu_Secondary	47	0	1	1	15	0				1	1	0	0	1	1	0		1	1	1	0	0	1	1	1	0	1	1
0	1964	16/11/2010	1	Mare_Juu_Secondary	47	0	1	0	15	0				1	1	1	1	1	1	1	0	0	1	1	0	1	1	0	1	1	1	1
0	1965	16/11/2010	1	Mare_Juu_Secondary	47	0	1	0	17	0				1	1	0	0	1	0	1	0	0	1	1	0	0	1	0	1	0	1	1
0	1966	16/11/2010	1	Mare_Juu_Secondary	47	0	1	1	14	1	1	1	1	1	0	0	1	0	1	1	0	0	0			0	1	0	1	1	1	1
0	1967	16/11/2010	1	Mare_Juu_Secondary	47	0	1	1	15	0				1	1	0	0	1	0	1	0	0	1	1	0	0	0	0	1	0	1	1
0	1968	16/11/2010	1	Mare_Juu_Secondary	47	0	1	1	15	0				1	1	0	1	1	1	0		1	1	1	0	1	0	0	1	1	1	1
0	1969	16/11/2010	1	Mare_Juu_Secondary	47	0	1	0	17	0				1	1	1	0	1	0	1	1	1	1	1	0	1	0	0	1	1	0	1
0	1970	16/11/2010	1	Mare_Juu_Secondary	47	0	1	1	15	0				1	1	0	1	1	1	1	0	1	1	1	0	1	1	0	1	0	1	1
0	1971	16/11/2010	1	Mare_Juu_Secondary	47	0	1	1	16	1	0	0	1	1	1	0	1	1	1	1	0	0	1	1	0	1	0	0	1	0	1	1
0	1972	16/11/2010	1	Mare_Juu_Secondary	47	0	1	0	16	0				1	1	0	1	1	1	0		0	1	0	0	1	1	1	1	1	1	1
0	1973	16/11/2010	1	Mare_Juu_Secondary	47	0	1	0	17	1	0	1	1	1	1	0	0	1	1	0		0	1	1	0	1	1	1	1	1	1	1
0	1974	16/11/2010	1	Mare_Juu_Secondary	47	0	1	1	17	1	1	0	1	1	1	1	1	1	1	0		0	1	1	0	1	1	1	1	1	1	1
0	1975	16/11/2010	1	Mare_Juu_Secondary	47	0	1	1	17	0				1	1	1	1	1	1	0		0	1	1	0	0	1	0	1	0	1	1
0	1976	16/11/2010	1	Mare_Juu_Secondary	47	0	1	0	19	0				1	0	0	1	1	1	0		0	1	1	0	1	1	1	0	0	1	1
0	1977	16/11/2010	1	Mare_Juu_Secondary	47	0	1	0	15	0				1	1	0	0	1	0	0		0	1	1	0	1	1	1	0	1	1	1
0	1978	16/11/2010	1	Mare_Juu_Secondary	47	0	1	1	15	0				1	1	0	0	1	1	1	0	1	1	0	0	1	1	0	1	1	0	1
0	1979	16/11/2010	1	Mare_Juu_Secondary	47	0	1	1	16	1	0	1	1	1	1	0	1	1	0	1	0	0	1	1	0	0	1	1	1	0	0	1
0	1980	16/11/2010	1	Mare_Juu_Secondary	47	0	1	0	16	1	0	1	1	1	1	0	0	1	0	1	0	0	1	1	0	1	1	1	1	1	1	1
0	1981	16/11/2010	1	Mare_Juu_Secondary	47	0	1	1	16	0				1	1	1	1	1	0	0		0	1	1	0	0	0	0	1	1	1	1
0	1982	16/11/2010	1	Mare_Juu_Secondary	47	0	1	1	16	0				1	0	1	0	1	1	0		0	1	1	0	0	1	0	1	1	1	1
0	1983	16/11/2010	1	Mare_Juu_Secondary	47	0	1	0	16	1	1	1	1	1	1	1	1	1	1	1	0	1	1	1	0	1	1	1	1	1	1	1
0	1984	16/11/2010	1	Mare_Juu_Secondary	47	0	1	0	16	1	0	1	1	1	1	0	1	1	1	1	0	0	1	1	0	0	0	0	1	1	1	1
0	1985	16/11/2010	1	Mare_Juu_Secondary	47	0	1	1	17	1	1	1	1	1	1	1	1	1	1	1	0	1	1	1	0	1	1	1	1	0	1	1
0	1986	16/11/2010	1	Mare_Juu_Secondary	47	0	1	1	16	1	0	0	1	1	1	0	1	1	1	1	0	0	1	1	0	1	1	1	1	1	1	1
0	1987	16/11/2010	1	Mare_Juu_Secondary	47	0	1	0	16	1	1	1	1	1	1	0	1	1	1	0		0	1	0	0	0	1	0	0	1	1	1
0	1988	16/11/2010	1	Mare_Juu_Secondary	47	0	1	0	20	0				1	0	1	0	1	1	0		0	1	1	0	0	0	0	1	1	1	1
0	1989	16/11/2010	1	Mare_Juu_Secondary	47	0	1	0	17	0				1	1	0	0	1	1	0		0	1	1	0	0	0	0	1	1	1	1
0	1990	16/11/2010	1	Mare_Juu_Secondary	47	0	1	0	18	1	0	1	1	1	0	1	1	1	1	1	0	0	1	1	0	0	1	0	1	1	1	1
0	1991	16/11/2010	1	Mare_Juu_Secondary	47	0	1	1	18	0				1	0	0	1	1	1	0		0	0			1	1	0	1	1	1	0
0	1992	16/11/2010	1	Mare_Juu_Secondary	47	0	1	0	16	1	0	0	1	1	1	1	0	1	1	0		0	0			1	1	0	0	1	0	1
0	1993	16/11/2010	1	Mare_Juu_Secondary	47	0	1	0	16	0				1	1	0	1	1	1	1	0	0	1	1	0	0	1	0	1	0	1	0
0	1994	16/11/2010	1	Mare_Juu_Secondary	47	0	1	1	18	1	0	0	1	1	1	0	1	1	1	0		0	1	1	0	1	1	1	0	1	0	0
0	1995	16/11/2010	1	Mare_Juu_Secondary	47	0	1	0	17	1	1	1	1	1	1	0	1	1	1	0		0	1	1	0	1	0	0	1	1	0	1
0	1996	16/11/2010	1	Mare_Juu_Secondary	47	0	1	0	19	0				1	1	1	1	1	1	1	0	0	1	1	0	0	1	0	1	1	1	1
0	1997	16/11/2010	1	Mare_Juu_Secondary	47	0	1	0	15	1	0	0	0	1	1	0	0	1	1	0		0	1	0	0	0	1	1	1	1	1	1
0	1998	16/11/2010	1	Mare_Juu_Secondary	47	0	1	1	18	0				1	1	0	1	1	1	0		0	1	1	0	0	1	1	0	0	0	0
0	1999	16/11/2010	1	Mare_Juu_Secondary	47	0	1	1	16	1	0	0	1	1	1	0	1	1	1	0		0	1	1	0	0	1	1	1	1	1	1
0	2000	16/11/2010	1	Mare_Juu_Secondary	47	0	1	0	16	1	0	1	1	1	1	1	1	1	1	0		0	1	1	0	1	1	1	1	1	1	1
0	2001	16/11/2010	1	Mare_Juu_Secondary	47	0	1	1	18	1	1	0	1	1	0	0	0	1	0	1	0	0	1	1	0	0	1	0	1	1	1	1
0	1871	16/11/2010	1	Maretadu_Secondary	48	1	1	1	15	1	0	0	1	1	1	1	1	1	1	0		0	1	1	0	1	1	1	1	1	1	1
0	1872	16/11/2010	1	Maretadu_Secondary	48	1	1	1	15	1	0	0	1	1	1	1	0	1	1	0		1	1	1	0	0	1	0	1	0	1	1
0	1873	16/11/2010	1	Maretadu_Secondary	48	1	1	0	16	1	1	0	1	1	1	0	1	1	1	0		0	1	1	0	1	1	1	1	1	1	1
0	1874	16/11/2010	1	Maretadu_Secondary	48	1	1	1	15	1	0	0	1	1	1	0	1	1	1	0		0	1	1	0	1	1	0	0	0	0	1
0	1875	16/11/2010	1	Maretadu_Secondary	48	1	1	1	15	1	0	1	1	1	1	1	0	1	1	0		0	1	1	0	1	1	0	1	1	1	1
0	1876	16/11/2010	1	Maretadu_Secondary	48	1	1	0	15	1	0	0	1	1	1	0	1	1	1	0		0	1	0	0	1	0	1	0	1	1	1
0	1877	16/11/2010	1	Maretadu_Secondary	48	1	1	0	16	1	0	1	1	1	1	0	1	1	1	1	0	0	1	1	0	1	1	1	0	0	1	1
0	1878	16/11/2010	1	Maretadu_Secondary	48	1	1	1	16	1	0	1	0	1	0	1	1	1	1	0		0	1	0	0	1	1	1	0	1	1	1
0	1879	16/11/2010	1	Maretadu_Secondary	48	1	1	1	17	1	1	0	1	1	1	0	1	1	1	1	0	0	1	1	0	1	1	1	1	1	0	0
0	1880	16/11/2010	1	Maretadu_Secondary	48	1	1	0	16	0				1	1	1	1	1	1	0		0	1	1	0	1	1	1	1	0	1	1
0	1881	16/11/2010	1	Maretadu_Secondary	48	1	1	0	15	1	0	1	1	1	1	1	1	1	1	1	0	0	1	0	0	1	1	0	1	1	1	1
0	1882	16/11/2010	1	Maretadu_Secondary	48	1	1	1	15	1	0	0	1	1	1	1	1	1	1	0		0	1	0	0	1	1	1	1	1	1	0
0	1883	16/11/2010	1	Maretadu_Secondary	48	1	1	1	14	1	0	1	1	1	1	1	0	1	0	0		0	1	1	0	1	1	1	0	0	0	1
0	1884	16/11/2010	1	Maretadu_Secondary	48	1	1	1	18	1	0	0	1	1	1	0	1	1	1	0		1	1	1	0	1	1	1	1	0	1	0
0	1885	16/11/2010	1	Maretadu_Secondary	48	1	1	1	17	1	0	1	1	1	1	1	1	0	1	0		0	1	1	0	0	1	0	0	1	1	1
0	1886	16/11/2010	1	Maretadu_Secondary	48	1	1	0	15	1	0	0	1	1	1	1	0	1	1	1	1	0	1	1	0	0	0	0	1	0	1	0
0	1887	16/11/2010	1	Maretadu_Secondary	48	1	1	1	17	1	1	0	1	1	1	1	0	1	0	0		0	1	1	0	0	1	0	1	1	1	1
0	1888	16/11/2010	1	Maretadu_Secondary	48	1	1	0	17	1	0	1	1	1	1	1	0	1	1	0		0	1	1	0	1	1	1	1	1	1	1
0	1889	16/11/2010	1	Maretadu_Secondary	48	1	1	0	16	1	1	1	1	1	0	1	1	1	1	1	0	0	1	1	0	1	1	1	1	1	1	1
0	1890	16/11/2010	1	Maretadu_Secondary	48	1	1	0	17	1	0	0	1	1	1	0	1	1	0	0		0	1	1	0	0	0	0	1	0	1	1
0	1891	16/11/2010	1	Maretadu_Secondary	48	1	1	1	14	1	0	0	1	1	1	0	1	1	1	0		0	1	0	0	1	1	1	1	1	1	1
0	1892	16/11/2010	1	Maretadu_Secondary	48	1	1	0	17	1	0	1	1	1	1	0	1	1	1	0		0	1	1	0	1	1	1	1	1	1	1
0	1893	16/11/2010	1	Maretadu_Secondary	48	1	1	1	15	1	0	1	1	1	1	0	1	1	1	0		0	1	1	0	1	1	1	1	0	1	1
0	1894	16/11/2010	1	Maretadu_Secondary	48	1	1	1	15	1	0	1	1	1	1	1	1	1	1	1	0	0	1	1	0	1	1	1	1	0	1	1
0	1895	16/11/2010	1	Maretadu_Secondary	48	1	1	0	17	0				1	1	1	1	1	1	0		0	1	1	0	1	1	1	0	1	1	1
0	1896	16/11/2010	1	Maretadu_Secondary	48	1	1	0	16	1	0	0	1	1	1	1	1	1	1	0		0	1	1	0	1	1	1	1	0	1	1
0	1897	16/11/2010	1	Maretadu_Secondary	48	1	1	0	16	1	0	0	1	1	0	1	1	1	1	0		1	1	0	0	1	1	1	0	1	1	1
0	1898	16/11/2010	1	Maretadu_Secondary	48	1	1	0	15	1	0	0	1	1	0	1	1	1	1	1	0	0	1	1	0	1	1	1	1	1	1	1
0	1899	16/11/2010	1	Maretadu_Secondary	48	1	1	0	19	1	0	1	1	1	1	0	1	1	1	0		0	1	1	0	1	1	0	1	1	1	1
0	1900	16/11/2010	1	Maretadu_Secondary	48	1	1	0	16	1	1	0	1	1	1	0	1	1	1	0	1	0	1	1	0	1	1	1	0	1	1	1
0	1901	16/11/2010	1	Maretadu_Secondary	48	1	1	1	15	1	0	1	1	1	0	1	1	1	1	0		0	1	1	0	0	1	0	1	1	1	1
0	1902	16/11/2010	1	Maretadu_Secondary	48	1	1	1	15	0				1	1	1	1	1	1	0		0	1	0	0	1	0	0	1	1	1	1
0	1903	16/11/2010	1	Maretadu_Secondary	48	1	1	0	16	0				1	0	0	1	1	1	0		0	1	1	0	0	0	0	1	1	0	1
0	1904	16/11/2010	1	Maretadu_Secondary	48	1	1	0	16	1	0	0	1	1	0	1	1	1	1	1	1	0	1	1	0	1	0	1	1	1	1	1
0	1905	16/11/2010	1	Maretadu_Secondary	48	1	1	0	16	0				1	1	0	1	1	1	0		0	1	1	0	1	0	0	1	1	1	1
0	1906	16/11/2010	1	Maretadu_Secondary	48	1	1	0	18	1	0	1	1	1	1	0	1	1	1	0		0	1	0	0	0	1	1	1	1	1	1
0	1907	16/11/2010	1	Maretadu_Secondary	48	1	1	0	15	0				1	1	1	1	1	1	0		0	1	1	0	1	0	0	1	0	0	1
0	1908	16/11/2010	1	Maretadu_Secondary	48	1	1	0	15	1	1	0	1	1	1	0	0	1	1	0		0	1	0	0	1	1	1	1	0	1	1
0	1909	16/11/2010	1	Maretadu_Secondary	48	1	1	0	15	1	1	1	1	1	1	0	1	1	1	0		0	1	1	0	0	1	1	1	0	1	1
0	1910	16/11/2010	1	Maretadu_Secondary	48	1	1	1	16	1	0	1	1	1	1	1	1	0	1	0		0	1	1	0	0	1	0	1	0	1	1
0	1911	16/11/2010	1	Maretadu_Secondary	48	1	1	1	14	0				1	1	0	1	1	1	1	1	1	1	1	0	1	1	0	1	1	1	1
0	1912	16/11/2010	1	Maretadu_Secondary	48	1	1	1	15	1	0	1	1	1	1	1	1	1	0	0		0	1	1	0	1	1	1	1	0	1	1
0	1913	16/11/2010	1	Maretadu_Secondary	48	1	1	0	16	0				1	0	1	0	1	1	1	0	0	1	1	0	1	1	1	1	1	1	1
0	1914	16/11/2010	1	Maretadu_Secondary	48	1	1	0	14	1	0	1	1	1	1	1	1	1	1	0		0	1	1	0	1	1	1	1	1	1	1
0	1786	5/11/2010	1	Masieda	49	1	1	1	16	1	0	1	1	1	1	0	1	1	1	1	0	0	1	0	0	1	1	1	1	1	1	1
0	1787	5/11/2010	1	Masieda	49	1	1	0	16	1	0	1	1	1	1	0	0	1	1	0		0	1	1	0	1	1	0	1	0	1	1
0	1788	5/11/2010	1	Masieda	49	1	1	0	15	1	1	1	1	1	1	1	1	1	0	0		0	1	1	0	0	1	0	0	0	0	0
0	1789	5/11/2010	1	Masieda	49	1	1	0	17	0				1	1	0	1	1	1	0		0	1	1	0	1	1	0	0	1	0	1
0	1790	5/11/2010	1	Masieda	49	1	1	1	15	1	1	1	1	1	1	0	0	1	1	0		0	1	1	0	1	1	1	1	0	0	1
0	1791	5/11/2010	1	Masieda	49	1	1	1	16	1	0	1	1	1	0	0	0	1	1	1	0	0	1	1	0	1	1	1	0	0	1	0
0	1792	5/11/2010	1	Masieda	49	1	1	0	18	0				1	1	0	0	1	0	0		0	1	1	0	1	0	0	1	1	1	1
0	1793	5/11/2010	1	Masieda	49	1	1	1	16	0				1	1	0	0	0	0	0		0	0			0	0	0	0	0	1	1
0	1794	5/11/2010	1	Masieda	49	1	1	1	15	0				1	1	1	1	1	1	0		0	0			1	1	1	1	1	1	1
0	1795	5/11/2010	1	Masieda	49	1	1	1	16	1	1	1	0	1	0	1	0	1	1	1	1	0	0			1	1	1	1	0	1	1
0	1796	5/11/2010	1	Masieda	49	1	1	1	16	1	0	0	1	1	1	0	0	1	1	0		0	1	0	0	1	1	1	0	1	0	0
0	1797	5/11/2010	1	Masieda	49	1	1	1	15	0				1	1	0	1	1	1	0		0	0			0	1	0	1	0	1	1
0	1798	5/11/2010	1	Masieda	49	1	1	1	17	1	1	1	1	1	0	1	1	1	1	0		0	0			1	1	1	0	0	1	1
0	1799	5/11/2010	1	Masieda	49	1	1	0	16	1	1	0	1	1	1	0	0	1	1	1	0	0	1	1	0	1	1	1	0	1	1	1
0	1800	5/11/2010	1	Masieda	49	1	1	0	15	0				0									0			0	0	0	0	0	1	1
0	1801	5/11/2010	1	Masieda	49	1	1	0	16	1	0	1	1	1	1	1	0	1	1	1	0	1	1	1	0	0	1	1	1	1	0	1
0	1802	5/11/2010	1	Masieda	49	1	1	0	16	0				1	1	0	0	1	1	0		1	0			0	1	0	1	1	1	0
0	1803	5/11/2010	1	Masieda	49	1	1	0	16	1	1	1	1	1	0	1	1	1	1	1	0	0	1	1	0	0	1	0	1	0	1	1
0	1804	5/11/2010	1	Masieda	49	1	1	0	17	0				1	0	1	0	1	1	0		1	0			1	1	0	0	0	0	1
0	1805	5/11/2010	1	Masieda	49	1	1	1	17	1	0	0	1	1	1	0	1	0	1	1	0	0	0			1	1	1	1	1	1	0
0	1806	5/11/2010	1	Masieda	49	1	1	0	16	0				0									0			0	1	0	0	0	0	1
0	1807	5/11/2010	1	Masieda	49	1	1	1	16	0				1	1	1	1	1	1	1	0	0	1	1	0	0	0	0	0	1	1	1
0	1808	5/11/2010	1	Masieda	49	1	1	0	14	1	0	1	1	1	0	0	1	1	1	1	0	0	1	0	0	0	0	1	1	0	1	1
0	1809	5/11/2010	1	Masieda	49	1	1	0	16	1	0	1	1	1	0	1	1	1	0	0		0	0			0	1	1	0	0	1	1
0	1810	5/11/2010	1	Masieda	49	1	1	0	17	1	0	1	1	1	1	0	1	1	1	0		0	1	0	0	1	1	1	1	0	1	1
0	1811	5/11/2010	1	Masieda	49	1	1	0	16	1	0	1	1	1	0	1	1	1	1	0		0	1	1	0	1	1	0	1	0	1	1
0	1812	5/11/2010	1	Masieda	49	1	1	0	18	1	0	1	1	1	1	0	0	1	1	0		0	0			0	1	0	0	1	1	1
0	1813	5/11/2010	1	Masieda	49	1	1	0	16	0				0									0			0	1	1	0	0	1	1
0	1814	5/11/2010	1	Masieda	49	1	1	1	15	0				1	1	0	0	1	1	0		0	0			1	1	0	1	1	0	1
0	1815	5/11/2010	1	Masieda	49	1	1	0	15	1	0	0	1	1	1	0	1	1	1	1	0	0	1	1	0	1	1	1	0	0	0	1
0	1816	5/11/2010	1	Masieda	49	1	1	1	15	1	0	0	1	1	1	1	1	1	1	1	0	1	1	1	0	1	1	1	1	0	1	1
0	1817	5/11/2010	1	Masieda	49	1	1	1	16	0				1	1	1	1	0	1	0		0	1	1	0	1	1	1	1	0	0	1
0	1818	5/11/2010	1	Masieda	49	1	1	1	16	1	0	1	1	1	1	0	1	1	1	1	0	0	1	0	0	1	1	1	1	1	1	1
0	1819	5/11/2010	1	Masieda	49	1	1	0	16	0				1	1	0	0	1	1	1	0	0	1	1	0	1	1	1	1	0	1	1
0	1820	5/11/2010	1	Masieda	49	1	1	0	16	0				1	1	0	1	1	1	1	0	1	0			1	1	0	1	0	1	1
0	1821	5/11/2010	1	Masieda	49	1	1	1	18	1	0	1	1	1	1	0	1	1	0	0		0	1	1	0	1	1	1	1	0	0	1
0	1822	5/11/2010	1	Masieda	49	1	1	1	17	0				0									0			0	1	0	0	0	0	0
0	1823	5/11/2010	1	Masieda	49	1	1	0	17	0				1	1	0	0	1	1	1	1	0	0			0	1	0	1	0	1	1
0	1824	5/11/2010	1	Masieda	49	1	1	0	13	0				1	0	1	1	1	0	0		1	1	1	0	0	1	0	0	0	1	1
0	1825	5/11/2010	1	Masieda	49	1	1	0	17	1	0	1	1	1	1	0	1	1	1	1	0	0	0			1	1	1	1	1	1	1
0	1826	5/11/2010	1	Masieda	49	1	1	0	17	0				1	1	0	1	1	1	0		0	0			1	0	0	0	0	1	1
0	1915	9/11/2010	1	Murray	50	1	1	0	16	1	0	1	1	1	0	1	0	1	1	1	0	1	1	1	0	1	1	0	1	1	1	1
0	1916	9/11/2010	1	Murray	50	1	1	1	14	1	1	1	1	1	1	0	1	1	1	0		0	1	1	0	1	1	0	1	1	1	1
0	1917	9/11/2010	1	Murray	50	1	1	0	14	0				1	1	0	1	1	1	1	0	0	1	1	0	1	1	1	0	1	1	1
0	1918	9/11/2010	1	Murray	50	1	1	0	18	1	0	0	1	1	1	0	1	1	1	1	0	0	1	1	0	1	1	1	1	0	1	1
0	1919	9/11/2010	1	Murray	50	1	1	1	14	1	1	1	1	1	1	0	0	1	1	1	1	0	1	1	0	1	1	1	0	1	1	1
0	1920	9/11/2010	1	Murray	50	1	1	1	14	1	0	1	1	1	1	0	1	1	1	0		0	1	1	0	1	1	1	0	1	1	1
0	1921	9/11/2010	1	Murray	50	1	1	1	15	0				1	1	0	1	1	1	0		0	0			1	1	1	1	0	1	1
0	1922	9/11/2010	1	Murray	50	1	1	1	17	1	0	0	1	1	1	0	0	1	1	1	0	0	1	1	0	0	0	0	1	1	1	1
0	1923	9/11/2010	1	Murray	50	1	1	0	17	1	0	0	1	1	1	1	1	1	1	1	0	1	1	1	0	1	1	1	1	0	1	1
0	1924	9/11/2010	1	Murray	50	1	1	0	18	1	0	1	1	1	1	0	1	1	1	0		0	1	1	0	1	1	1	1	1	1	1
0	1925	9/11/2010	1	Murray	50	1	1	0	17	0				1	1	0	0	1	0	1	0	0	1	1	0	1	1	1	1	0	0	0
0	1926	9/11/2010	1	Murray	50	1	1	1	14	1	0	0	1	1	1	0	1	1	0	1	0	0	1	1	0	1	1	0	1	1	1	1
0	1927	9/11/2010	1	Murray	50	1	1	1	15	1	0	0	1	1	1	0	1	1	1	0		0	1	1	0	1	1	1	1	0	1	0
0	1928	9/11/2010	1	Murray	50	1	1	1	15	0				0									0			1	1	1	1	0	1	1
0	1929	9/11/2010	1	Murray	50	1	1	1	15	1	0	0	1	1	1	0	0	1	1	1	0	0	1	1	0	1	1	1	1	0	1	1
0	1930	9/11/2010	1	Murray	50	1	1	1	16	1	1	0	1	1	1	0	0	1	1	1	0	0	1	1	0	1	1	0	1	1	1	0
0	1931	9/11/2010	1	Murray	50	1	1	1	15	1	0	0	1	1	1	0	1	1	1	0		0	1	1	0	1	0	0	0	1	1	1
0	1932	9/11/2010	1	Murray	50	1	1	1	18	1	0	1	1	1	1	0	0	1	1	0		0	1	1	0	1	1	0	0	0	1	1
0	1933	9/11/2010	1	Murray	50	1	1	0	17	1	1	1	1	1	1	0	1	1	0	0		0	1	0	0	1	1	1	0	0	1	1
0	1934	9/11/2010	1	Murray	50	1	1	0	17	1	0	0	1	1	1	0	0	1	0	1	1	0	0			1	1	0	0	0	0	1
0	1935	9/11/2010	1	Murray	50	1	1	1	17	1	0	0	1	1	0	1	0	0	1	0		0	1	1	0	1	1	1	1	0	1	0
0	1936	9/11/2010	1	Murray	50	1	1	1	16	1	0	1	1	1	0	1	1	1	1	0		0	1	1	0	1	1	1	0	0	1	1
0	1937	9/11/2010	1	Murray	50	1	1	1	15	1	0	0	1	1	1	0	1	1	1	0		0	1	1	0	1	1	1	0	1	1	1
0	1938	9/11/2010	1	Murray	50	1	1	1	17	1	0	0	1	1	1	0	1	1	1	1	1	0	1	1	0	1	0	1	1	1	0	1
0	1939	9/11/2010	1	Murray	50	1	1	0	18	1	1	1	1	1	1	0	1	1	1	0		0	1	1	0	1	1	1	1	1	1	1
0	1940	9/11/2010	1	Murray	50	1	1	1	18	1	0	0	1	1	1	0	1	1	1	0		0	1	1	0	1	0	0	0	1	1	1
0	1941	9/11/2010	1	Murray	50	1	1	0	15	0				1	1	0	1	1	1	1	0	0	1	1	0	0	1	0	0	0	1	1
0	1942	9/11/2010	1	Murray	50	1	1	0	17	1	0	1	1	1	1	0	1	1	0	0		0	1	1	0	1	1	1	0	1	1	1
0	1943	9/11/2010	1	Murray	50	1	1	0	18	0				1	1	0	0	1	1	1	0	0	1	1	0	1	1	1	0	0	1	1
0	1944	9/11/2010	1	Murray	50	1	1	0	16	1	0	0	1	1	1	1	1	1	1	1	0	1	1	1	0	0	1	1	0	1	1	0
0	1945	9/11/2010	1	Murray	50	1	1	0	17	1	0	1	1	1	1	1	1	1	1	0		0	1	1	0	1	1	0	1	0	1	1
0	1946	9/11/2010	1	Murray	50	1	1	1	18	1	0	1	1	1	1	1	1	1	1	0		0	1	1	0	1	1	1	1	1	1	1
0	1947	9/11/2010	1	Murray	50	1	1	0	18	1	0	0	1	1	1	0	0	1	0	0		1	1	1	0	1	0	0	1	0	1	1
0	1948	9/11/2010	1	Murray	50	1	1	0	16	1	1	1	1	1	0	1	1	1	1	0		1	1	1	0	1	1	0	1	1	1	1
0	1949	9/11/2010	1	Murray	50	1	1	1	15	0				1	1	0	1	1	1	0		0	1	1	0	1	1	1	0	1	1	1
0	1950	9/11/2010	1	Murray	50	1	1	1	16	0				1	0	1	1	1	1	1	0	0	1	1	0	1	1	1	1	1	1	1
0	1951	9/11/2010	1	Murray	50	1	1	1	15	1	0	1	1	1	1	0	1	1	1	0		0	1	1	0	1	1	1	0	1	1	1
0	1952	9/11/2010	1	Murray	50	1	1	1	18	0				1	1	0	1	1	0	0		0	1	1	0	1	1	1	1	1	1	0
0	1953	9/11/2010	1	Murray	50	1	1	1	16	0				1	1	0	0	1	1	0		0	1	1	0	1	1	1	1	1	1	1
0	1954	9/11/2010	1	Murray	50	1	1	0	17	1	0	1	1	1	1	0	1	1	1	0		0	1	1	0	1	1	1	0	1	1	1
0	1955	9/11/2010	1	Murray	50	1	1	0	18	1	0	0	1	1	1	0	1	1	1	1	0	0	1	1	0	1	1	1	1	1	1	1
0	1956	9/11/2010	1	Murray	50	1	1	0	16	1	1	1	1	1	0	0	1	1	1	1	0	0	1	1	0	0	1	0	0	1	1	1
0	1744	9/11/2010	1	Nowu	51	0	1	1	17	0				1	1	0	1	1	1	0		0	1	1	0	1	1	1	0	0	1	0
0	1745	9/11/2010	1	Nowu	51	0	1	1	17	0				1	1	1	1	1	1	1	1	0	1	1	0	0	0	0	0	1	1	1
0	1746	9/11/2010	1	Nowu	51	0	1	1	15	0				1	1	1	0	1	1	0		0	1	1	0	0	1	0	0	0	1	0
0	1747	9/11/2010	1	Nowu	51	0	1	1	16	1	1	1	1	1	1	0	0	1	1	0		0	1	1	0	1	1	1	1	1	1	1
0	1748	9/11/2010	1	Nowu	51	0	1	1	14	0				1	1	1	0	1	1	0		0	1	1	0	1	0	0	0	1	1	0
0	1749	9/11/2010	1	Nowu	51	0	1	1	15	0				1	1	0	1	1	1	0		1	1	0	0	0	1	0	0	0	1	1
0	1750	9/11/2010	1	Nowu	51	0	1	1	16	0				1	0	1	0	1	1	1	0	0	1	1	0	1	1	1	1	1	1	1
0	1751	9/11/2010	1	Nowu	51	0	1	1	15	1	0	1	1	1	1	0	1	1	1	1	0	0	1	1	0	1	1	1	0	1	1	1
0	1752	9/11/2010	1	Nowu	51	0	1	0	18	1	0	0	1	1	1	1	0	1	1	0		0	1	1	0	0	1	1	0	0	0	1
0	1753	9/11/2010	1	Nowu	51	0	1	1	16	1	1	0	1	1	1	0	0	1	1	0		0	0			0	1	0	1	1	1	0
0	1754	9/11/2010	1	Nowu	51	0	1	0	16	1	0	1	0	1	1	0	0	0	1	0		0	1	0	0	1	0	0	0	0	1	1
0	1755	9/11/2010	1	Nowu	51	0	1	0	17	1	1	1	1	1	1	0	0	1	1	0		0	1	1	0	1	1	1	1	1	1	1
0	1756	9/11/2010	1	Nowu	51	0	1	1	14	0				1	1	0	0	1	1	0		0	1	1	0	0	1	0	1	0	1	1
0	1757	9/11/2010	1	Nowu	51	0	1	0	15	1	0	1	1	1	1	1	1	1	1	1	0	0	1	1	0	1	1	0	0	1	1	1
0	1758	9/11/2010	1	Nowu	51	0	1	1	15	0				1	1	0	1	1	1	1	1	0	1	1	0	1	1	0	1	1	1	0
0	1759	9/11/2010	1	Nowu	51	0	1	1	16	0				1	1	0	1	1	1	0		0	1	1	0	1	1	1	1	0	1	0
0	1760	9/11/2010	1	Nowu	51	0	1	1	14	0				1	1	0	1	1	1	0		0	1	1	0	0	1	0	0	0	1	1
0	1761	9/11/2010	1	Nowu	51	0	1	1	15	1	0	1	1	1	0	1	1	0	1	1	0	0	1	1	0	1	1	1	1	1	1	1
0	1762	9/11/2010	1	Nowu	51	0	1	1	16	1	0	1	1	1	0	1	1	1	1	0		0	1	1	0	1	1	0	0	0	1	1
0	1763	9/11/2010	1	Nowu	51	0	1	0	16	0				1	1	1	0	1	1	1	0	0	1	1	0	0	1	0	0	0	1	1
0	1764	9/11/2010	1	Nowu	51	0	1	0	15	0				1	1	0	1	1	1	0		0	1	1	0	1	1	0	0	1	0	1
0	1765	9/11/2010	1	Nowu	51	0	1	0	17	1	0	0	1	1	0	1	0	1	1	1	0	0	1	1	0	1	1	1	1	0	1	1
0	1766	9/11/2010	1	Nowu	51	0	1	0	16	0				1	1	0	1	1	1	0		0	1	1	0	1	1	1	0	0	1	1
0	1767	9/11/2010	1	Nowu	51	0	1	0	15	0				1	1	0	1	1	1	0		0	1	1	0	1	1	1	0	1	0	1
0	1768	9/11/2010	1	Nowu	51	0	1	0	16	1	0	0	1	1	1	1	0	1	1	1	1	0	1	1	0	1	1	1	0	0	1	1
0	1769	9/11/2010	1	Nowu	51	0	1	1	16	1	0	0	1	1	1	0	1	1	1	1	0	0	1	1	0	1	1	1	1	0	1	0
0	1770	9/11/2010	1	Nowu	51	0	1	0	15	1	0	1	0	1	1	1	0	1	1	1	0	1	1	1	0	1	1	1	1	0	1	1
0	1771	9/11/2010	1	Nowu	51	0	1	1	15	0				1	1	0	1	1	1	0		0	1	1	0	1	1	0	1	0	1	0
0	1772	9/11/2010	1	Nowu	51	0	1	1	16	1	0	1	1	1	1	0	0	1	0	1	0	0	1	1	0	1	1	1	1	0	1	1
0	1773	9/11/2010	1	Nowu	51	0	1	1	15	0				1	1	1	1	1	1	1	0	0	0			1	1	1	1	0	1	1
0	1774	9/11/2010	1	Nowu	51	0	1	1	16	0				1	1	1	1	1	1	0		0	1	1	0	0	0	0	0	1	1	1
0	1775	9/11/2010	1	Nowu	51	0	1	0	17	0				1	1	1	1	1	1	1	1	0	0			1	1	1	0	0	1	1
0	1776	9/11/2010	1	Nowu	51	0	1	0	16	1	1	1	1	1	0	0	1	1	1	0		0	1	1	0	1	1	1	1	1	1	1
0	1777	9/11/2010	1	Nowu	51	0	1	0	16	1	0	1	1	1	1	1	0	1	1	1	0	0	1	1	0	1	1	0	1	1	1	1
0	1778	9/11/2010	1	Nowu	51	0	1	0	14	0				1	1	1	0	1	0	0		0	0			0	1	0	0	0	1	1
0	1779	9/11/2010	1	Nowu	51	0	1	0	18	1	0	0	1	1	1	1	0	1	1	1	0	0	1	1	0	0	0	0	1	1	1	1
0	1780	9/11/2010	1	Nowu	51	0	1	0	14	1	0	0	1	1	1	1	0	1	1	1	0	0	1	1	0	1	1	0	1	1	1	1
0	1781	9/11/2010	1	Nowu	51	0	1	0	15	1	1	0	1	1	1	0	1	1	1	0		0	1	1	0	0	0	0	1	1	1	1
0	1782	9/11/2010	1	Nowu	51	0	1	0	14	1	0	0	1	1	1	1	1	1	1	1	0	0	1	1	0	1	1	0	1	0	1	1
0	1783	9/11/2010	1	Nowu	51	0	1	1	14	0				1	1	0	0	1	0	0		0	1	1	0	0	0	0	0	0	0	0
0	1784	9/11/2010	1	Nowu	51	0	1	1	15	1	0	1	1	1	1	0	1	1	1	0		0	0			0	0	0	0	0	1	1
0	1785	9/11/2010	1	Nowu	51	0	1	0	15	0				1	0	0	0	1	0	0		0	1	1	0	0	0	0	0	1	1	1
0	1450	19/11/2010	1	P_Marmo	52	1	1	0	17	0				1	1	1	1	0	1	1	1	0	1	1	0	0	1	1	1	1	1	1
0	1451	19/11/2010	1	P_Marmo	52	1	1	0	20	1	1	1	1	1	1	0	1	1	1	1	0	0	1	1	0	1	1	0	0	0	0	1
0	1452	19/11/2010	1	P_Marmo	52	1	1	1	17	1	0	0	1	1	1	0	1	1	1	0		0	1	1	0	1	0	0	1	1	0	1
0	1453	19/11/2010	1	P_Marmo	52	1	1	1	18	0				1	1	0	0	1	1	0		0	1	1	0	1	1	1	1	0	1	1
0	1454	19/11/2010	1	P_Marmo	52	1	1	1	18	1	1	0	1	1	1	1	0	1	1	1	0	0	1	1	0	1	1	1	1	1	1	1
[truncated: 4,951 more rows]

## Sheet: Variables
	VARIABLES
	Visit = Stage of Assessment
		0	Baseline
		1	First post-intervention assessment
		2	Second post-intervention assessment
		3	Third post-intervention assessment (secondary schools only)
	School_Category = Level of study
		0	Primary School
		1	Secondary School
	Treatment = Intervention Allocation
		0	Control group
		1	Intervention group
	School_Participation
		0	Baseline only
		1	Baseline + Follow-ups
